# Supplementary material for: Impact of selected risk factors on motor performance in the third month of life and motor development in the ninth month
Source: PeerJ. 2023 Jun 13;11:e15460. doi: 10.7717/peerj.15460 (PMC10274587; doi:10.7717/peerj.15460)
Supplement: Supplemental Information 1 [file peerj-11-15460-s001.xlsx]

## Sheet: recouded
boys 0/ girls 1	week of gestation at birth	born preterm /born at term	born preterm=1/born at term=0	weight	APGAR score in 5	apgar category 5: 2- good condition > 7 Apgar score; 1-low (4-7 points) 5-minute Apgar ; 0-poor Apgar score in 5ht minute	lower category Apgar in 5th minute	lowerAPGAR5=1 good condition=0	IVH intraventricular hemorrhage 0- NO; 1- YES	degree of IVH	RDS respiratory distress syndrome 0- NO; 1- YES	hypotrophy 1- NO; )- YES	hyperbilirubinemia 1- NO; 0-YES	sume+preterm+APGAR	risk factors, as single or in combinations	risk factors	Quantitative pronation-supination	Qualitative assessment at the age of 3 months	isolated head rotation	rigth arm in front	Left arm in front	right palm loosely open	Left palm loosely open	right thumb outside	Left thumb outside	spine in segmental extension	right scapula situated in medial position	Left scapula situated in medial position	pelvis in an intermediate position	right lower limbs situated loosely a	Left lower limbs situated loosely	right foot in an intermediate position	Left foot in an intermediate position	qualitative assessment supine positions 3 th	head symmetry	spine in extension	right shoulder in a balance between external and internal rotation	Left shoulder in a balance between external and internal rotation	right wrist in an intermediate position	left wrist in an intermediate position	right thumb outside	Left thumb outside	right palm in an intermediate position	Left palm in an intermediate position	pelvis extended	right lower limb situated in moderate external rotation, bent at the right angle at hip and knee joints	L eft lower limb situated in moderate external rotation,bent at the right angle at hip and knee joints	right foot in an intermediate position	Left foot in an intermediate position
0	38	1	0	2230	10	2	OK	0	0	0	0	1	0	1	hipo	yes	1-1	15	1	1	1	1	1	1	1	1	1	1	1	1	1	1	1	15	1	1	1	1	1	1	1	1	1	1	1	1	1	1	1
1	38	1	0	2210	10	2	OK	0	0	0	0	1	0	1	hipo	yes	1-1	15	1	1	1	1	1	1	1	1	1	1	1	1	1	1	1	15	1	1	1	1	1	1	1	1	1	1	1	1	1	1	1
1	38	1	0	1970	10	2	OK	0	0	0	0	1	0	1	hipo	yes	1-1	15	1	1	1	1	1	1	1	1	1	1	1	1	1	1	1	15	1	1	1	1	1	1	1	1	1	1	1	1	1	1	1
0	38	1	0	2230	10	2	OK	0	0	0	0	1	0	1	hipo	yes	1-1	15	1	1	1	1	1	1	1	1	1	1	1	1	1	1	1	15	1	1	1	1	1	1	1	1	1	1	1	1	1	1	1
1	38	1	0	2210	10	2	OK	0	0	0	0	1	0	1	hipo	yes	1-1	15	1	1	1	1	1	1	1	1	1	1	1	1	1	1	1	15	1	1	1	1	1	1	1	1	1	1	1	1	1	1	1
1	39	1	0	2430	10	2	OK	0	0	0	0	1	0	1	hipo	yes	0-0	0	0	0	0	0	0	0	0	0	0	0	0	0	0	0	0	0	0	0	0	0	0	0	0	0	0	0	0	0	0	0	0
1	39	1	0	2590	10	2	OK	0	0	0	0	1	0	1	hipo	yes	1-1	15	1	1	1	1	1	1	1	1	1	1	1	1	1	1	1	15	1	1	1	1	1	1	1	1	1	1	1	1	1	1	1
1	40	1	0	2720	6	1	1	1	0	0	0	1	0	2	hipo+APGAR	yes	1-1	15	1	1	1	1	1	1	1	1	1	1	1	1	1	1	1	15	1	1	1	1	1	1	1	1	1	1	1	1	1	1	1
0	41	1	0	2260	10	2	OK	0	0	0	0	1	0	1	hipo	yes	1-1	15	1	1	1	1	1	1	1	1	1	1	1	1	1	1	1	15	1	1	1	1	1	1	1	1	1	1	1	1	1		1
1	41	1	0	3840	10	2	OK	0	0	0	0	1	0	1	hipo	yes	1-1	15	1	1	1	1	1	1	1	1	1	1	1	1	1	1	1	15	1	1	1	1	1	1	1	1	1	1	1	1	1	1	1
0	38	1	0	2160	10	2	OK	0	0	0	0	0	1	1	hyper	yes	1-1	15	1	1	1	1	1	1	1	1	1	1	1	1	1	1	1	15	1	1	1	1	1	1	1	1	1	1	1	1	1	1	1
0	39	1	0	3350	9	2	OK	0	0	0	0	0	1	1	hyper	yes	0-0	0	0	0	0	0	0	0	0	0	0	0	0	0	0	0	0	0	0	0	0	0	0	0	0	0	0	0	0	0	0	0	0
1	39	1	0	2980	10	2	OK	0	0	0	0	0	1	1	hyper	yes	0-0	6	0	0	0	0	0	1	1	0	0	0	0	1	1	1	1	8	0	0	1	0	1	1	1	1	1	1	0	0	0	0	0
0	39	1	0	2880	10	2	OK	0	0	0	0	0	1	1	hyper	yes	1-1	15	1	1	1	1	1	1	1	1	1	1	1	1	1	1	1	15	1	1	1	1	1	1	1	1	1	1	1	1	1	1	1
0	40	1	0	3880	9	2	OK	0	0	0	0	0	1	1	hyper	yes	0-0	9	1	1	0	1	1	1	1	0	0	0	0	1	0	1	1	10	1	0	0	0	1	1	1	1	1	1	0	1	0	1	1
0	40	1	0	3910	10	2	OK	0	0	0	0	0	1	1	hyper	yes	0-0	6	0	0	0	1	1	1	1	0	0	0	0	0	0	1	1	4	0	0	0	0	0	0	0	0	0	0	0	1	1	1	1
0	41	1	0	3200	10	2	OK	0	0	0	0	0	1	1	hyper	yes	0-0	0	0	0	0	0	0	0	0	0	0	0	0	0	0	0	0	0	0	0	0	0	0	0	0	0	0	0	0	0	0	0	0
1	41	1	0	3070	9	2	OK	0	0	0	0	0	1	1	hyper	yes	1-0	11	1	0	1	1	1	1	1	0	0	1	0	1	1	1	1	8	0	0	0	0	1	1	1	1	1	1	0	1	1	0	0
1	41	1	0	3070	9	2	OK	0	0	0	0	0	1	1	hyper	yes	1-0	11	1	0	1	1	1	1	1	0	0	1	0	1	1	1	1	8	0	0	0	0	1	1	1	1	1	1	0	1	1	0	0
0	41	1	0	2820	10	2	OK	0	0	0	0	0	1	1	hyper	yes	0-0	0	0	0	0	0	0	0	0	0	0	0	0	0	0	0	0	0	0	0	0	0	0	0	0	0	0	0	0	0	0	0	0
0	41	1	0	3540	9	2	OK	0	0	0	0	0	1	1	hyper	yes	1-1	15	1	1	1	1	1	1	1	1	1	1	1	1	1	1	1	15	1	1	1	1	1	1	1	1	1	1	1	1	1	1	1
0	41	1	0	3540	9	2	OK	0	0	0	0	0	1	1	hyper	yes	1-1	15	1	1	1	1	1	1	1	1	1	1	1	1	1	1	1	15	1	1	1	1	1	1	1	1	1	1	1	1	1	1	1
1	42	1	0	3160	10	2	OK	0	0	0	0	0	1	1	hyper	yes	1-1	15	1	1	1	1	1	1	1	1	1	1	1	1	1	1	1	15	1	1	1	1	1	1	1	1	1	1	1	1	1	1	1
1	42	1	0	3160	10	2	OK	0	0	0	0	0	1	1	hyper	yes	1-1	15	1	1	1	1	1	1	1	1	1	1	1	1	1	1	1	15	1	1	1	1	1	1	1	1	1	1	1	1	1	1	1
0	38	1	0	3960	10	2	OK	0	0	0	1	0	0	1	IVH	yes	0-0	10	1	0	1	1	1	1	1	0	0	1	0	0	1	1	1	13	1	0	1	1	1	1	1	1	1	1	0	1	1	1	1
1	39	1	0	4130	10	2	OK	0	1	2	0	0	0	1	IVH	yes	0-1	7	0	0	0	0	0	1	1	0	0	1	1	1	1	1	1	15	1	1	1	1	1	1	1	1	1	1	1	1	1	1	1
0	40	1	0	4490	9	2	OK	0	1	1	0	0	0	1	IVH	yes	0-0	6	0	0	0	1	1	1	1	0	0	0	0	0	0	1	1	8	0	0	0	0	1	0	1	0	1	0	1	1	1	1	1
1	40	1	0	4050	10	2	OK	0	1	1	0	0	0	1	IVH	yes	0-1	11	1	1	0	1	1	1	1	0	0	0	1	1	1	1	1	15	1	1	1	1	1	1	1	1	1	1	1	1	1	1	1
0	40	1	0	3500	10	2	OK	0	1	1	0	0	0	1	IVH	yes	1-1	15	1	1	1	1	1	1	1	1	1	1	1	1	1	1	1	15	1	1	1	1	1	1	1	1	1	1	1	1	1	1	1
0	41	1	0	3540	10	2	OK	0	1	3	0	0	0	1	IVH	yes	1-1	15	1	1	1	1	1	1	1	1	1	1	1	1	1	1	1	15	1	1	1	1	1	1	1	1	1	1	1	1	1	1	1
0	41	1	0	3480	10	2	OK	0	1	1	0	0	0	1	IVH	yes	1-1	15	1	1	1	1	1	1	1	1	1	1	1	1	1	1	1	15	1	1	1	1	1	1	1	1	1	1	1	1	1	1	1
0	41	1	0	3480	10	2	OK	0	1	1	0	0	0	1	IVH	yes	1-1	15	1	1	1	1	1	1	1	1	1	1	1	1	1	1	1	15	1	1	1	1	1	1	1	1	1	1	1	1	1	1	1
0	41	1	0	3160	8	2	OK	0	0	0	1	0	0	1	IVH	tak	0-1	9	0	0	0	1	1	1	1	0	0	0	1	1	1	1	1	15	1	1	1	1	1	1	1	1	1	1	1	1	1	1	1
1	39	1	0	3100	10	2	OK	0	1	3	1	0	0	2	IVH+RDS	yes	0-0	0	0	0	0	0	0	0	0	0	0	0	0	0	0	0	0	0	0	0	0	0	0	0	0	0	0	0	0	0	0	0	0
0	39	1	0	5160	9	2	OK	0	0	0	1	0	1	2	RDS+hyper	yes	1-1	15	1	1	1	1	1	1	1	1	1	1	1	1	1	1	1	15	1	1	1	1	1	1	1	1	1	1	1	1	1	1	1
0	41	1	0	4700	2	0	1	1	0	0	1	0	1	3	RDS+hyper+APGAR	yes	0-0	7	1	0	0	0	1	0	1	0	0	0	0	1	1	1	1	4	1	0	0	0	0	1	0	0	1	1	0	0	0	0	0
1	30	0	1	2900	9	2	OK	0	0	0	0	0	0	1	born preterm	yes	1-1	15	1	1	1	1	1	1	1	1	1	1	1	1	1	1	1	15	1	1	1	1	1	1	1	1	1	1	1	1	1	1	1
0	31	0	1	1810	6	1	1	1	0	0	0	0	0	2	born preterm+APGAR	yes	0-0	11	1	0	0	1	1	1	1	1	0	0	1	1	1	1	1	13	1	1	0	0	1	1	1	1	1	1	1	1	1	1	1
0	31	0	1	1620	7	1	1	1	0	0	0	0	0	2	born preterm+APGAR	yes	0-1	11	1	0	0	1	1	1	1	1	0	0	1	1	1	1	1	15	1	1	1	1	1	1	1	1	1	1	1	1	1	1	1
0	32	0	1	1850	7	1	1	1	0	0	0	0	0	2	born preterm+APGAR	yes	0-0	0	0	0	0	0	0	0	0	0	0	0	0	0	0	0	0	0	0	0	0	0	0	0	0	0	0	0	0	0	0	0	0
0	32	0	1	1850	7	1	1	1	0	0	0	0	0	2	born preterm+APGAR	yes	0-0	0	0	0	0	0	0	0	0	0	0	0	0	0	0	0	0	0	0	0	0	0	0	0	0	0	0	0	0	0	0	0	0
1	32	0	1	2320	9	2	OK	0	0	0	0	0	0	1	born preterm	yes	1-1	15	1	1	1	1	1	1	1	1	1	1	1	1	1	1	1	15	1	1	1	1	1	1	1	1	1	1	1	1	1	1	1
1	32	0	1	2320	9	2	OK	0	0	0	0	0	0	1	born preterm	yes	1-1	15	1	1	1	1	1	1	1	1	1	1	1	1	1	1	1	15	1	1	1	1	1	1	1	1	1	1	1	1	1	1	1
0	33	0	1	1560	8	2	OK	0	0	0	0	0	0	1	born preterm	yes	0-0	9	1	0	0	1	1	1	1	0	0	0	0	1	1	1	1	7	1	0	0	0	1	1	1	1	1	1	0	0	0	1	1
1	33	0	1	1820	10	2	OK	0	0	0	0	0	0	1	born preterm	yes	0-0	8	0	0	0	1	1	1	1	0	0	0	0	1	1	1	1	6	0	0	0	0	1	1	1	1	1	1	0	0	0	0	0
1	33	0	1	1820	10	2	OK	0	0	0	0	0	0	1	born preterm	yes	0-0	8	0	0	0	1	1	1	1	0	0	0	0	1	1	1	1	6	0	0	0	0	1	1	1	1	1	1	0	0	0	0	0
0	33	0	1	1690	10	2	OK	0	0	0	0	0	0	1	born preterm	yes	0-0	6	0	0	0	0	0	1	1	0	0	0	0	1	1	1	1	11	1	0	0	0	1	1	1	1	1	1	0	1	1	1	1
1	33	0	1	1600	8	2	OK	0	0	0	0	0	0	1	born preterm	yes	1-1	15	1	1	1	1	1	1	1	1	1	1	1	1	1	1	1	15	1	1	1	1	1	1	1	1	1	1	1	1	1	1	1
0	33	0	1	2770	10	2	OK	0	0	0	0	0	0	1	born preterm	yes	1-1	15	1	1	1	1	1	1	1	1	1	1	1	1	1	1	1	15	1	1	1	1	1	1	1	1	1	1	1	1	1	1	1
1	34	0	1	1710	9	2	OK	0	0	0	0	0	0	1	born preterm	yes	0-0	0	0	0	0	0	0	0	0	0	0	0	0	0	0	0	0	2	0	0	0	0	0	0	0	1	0	1	0	0	0	0	0
1	34	0	1	3030	10	2	OK	0	0	0	0	0	0	1	born preterm	yes	1-1	15	1	1	1	1	1	1	1	1	1	1	1	1	1	1	1	15	1	1	1	1	1	1	1	1	1	1	1	1	1	1	1
1	34	0	1	2080	9	2	OK	0	0	0	0	0	0	1	born preterm	yes	1-1	11	1	1	1	1	1	1	1	0	1	1	0	0	0	0	0	9	1	0	1	1	1	1	1	1	1	1	0	0	0	0	0
0	34	0	1	1560	10	2	OK	0	0	0	0	0	0	1	born preterm	yes	0-0	8	0	0	0	1	1	1	1	0	0	0	0	1	1	1	1	5	0	0	1	0	1	0	1	0	1	1	0	0	0	0	0
0	34	0	1	3030	10	2	OK	0	0	0	0	0	0	1	born preterm	yes	1-1	15	1	1	1	1	1	1	1	1	1	1	1	1	1	1	1	15	1	1	1	1	1	1	1	1	1	1	1	1	1	1	1
1	35	0	1	2200	10	2	OK	0	0	0	0	0	0	1	born preterm	yes	0-1	9	1	0	0	0	0	1	1	1	0	0	1	1	1	1	1	9	1	1	0	0	0	0	1	1	0	0	1	1	1	1	1
1	35	0	1	2180	8	2	OK	0	0	0	0	0	0	1	born preterm	yes	1-1	15	1	1	1	1	1	1	1	1	1	1	1	1	1	1	1	15	1	1	1	1	1	1	1	1	1	1	1	1	1	1	1
0	35	0	1	2420	10	2	OK	0	0	0	0	0	0	1	born preterm	yes	0-1	9	0	0	0	1	1	1	1	0	0	0	1	1	1	1	1	15	1	1	1	1	1	1	1	1	1	1	1	1	1	1	1
0	35	0	1	2460	10	2	OK	0	0	0	0	0	0	1	born preterm	yes	1-1	15	1	1	1	1	1	1	1	1	1	1	1	1	1	1	1	15	1	1	1	1	1	1	1	1	1	1	1	1	1	1	1
1	35	0	1	2650	9	2	OK	0	0	0	0	0	0	1	born preterm	yes	1-1	15	1	1	1	1	1	1	1	1	1	1	1	1	1	1	1	15	1	1	1	1	1	1	1	1	1	1	1	1	1	1	1
0	35	0	1	1830	8	2	OK	0	0	0	0	0	0	1	born preterm	yes	1-1	15	1	1	1	1	1	1	1	1	1	1	1	1	1	1	1	15	1	1	1	1	1	1	1	1	1	1	1	1	1	1	1
1	35	0	1	2600	10	2	OK	0	0	0	0	0	0	1	born preterm	yes	1-1	15	1	1	1	1	1	1	1	1	1	1	1	1	1	1	1	8	1	1	0	0	1	1	1	1	1	1	0	0	0	0	0
1	35	0	1	2830	10	2	OK	0	0	0	0	0	0	1	born preterm	yes	1-1	15	1	1	1	1	1	1	1	1	1	1	1	1	1	1	1	15	1	1	1	1	1	1	1	1	1	1	1	1	1	1	1
0	35	0	1	3130	9	2	OK	0	0	0	0	0	0	1	born preterm	yes	0-1	11	1	0	0	1	1	1	1	1	0	0	1	1	1	1	1	15	1	1	1	1	1	1	1	1	1	1	1	1	1	1	1
0	35	0	1	2420	10	2	OK	0	0	0	0	0	0	1	born preterm	yes	0-1	9	0	0	0	1	1	1	1	0	0	0	1	1	1	1	1	15	1	1	1	1	1	1	1	1	1	1	1	1	1	1	1
0	35	0	1	2260	9	2	OK	0	0	0	0	0	0	1	born preterm	yes	1-1	15	1	1	1	1	1	1	1	1	1	1	1	1	1	1	1	15	1	1	1	1	1	1	1	1	1	1	1	1	1	1	1
1	35	0	1	1570	10	2	OK	0	0	0	0	0	0	1	born preterm	yes	1-1	15	1	1	1	1	1	1	1	1	1	1	1	1	1	1	1	15	1	1	1	1	1	1	1	1	1	1	1	1	1	1	1
1	35	0	1	1570	10	2	OK	0	0	0	0	0	0	1	born preterm	yes	1-1	15	1	1	1	1	1	1	1	1	1	1	1	1	1	1	1	15	1	1	1	1	1	1	1	1	1	1	1	1	1	1	1
0	35	0	1	2260	9	2	OK	0	0	0	0	0	0	1	born preterm	yes	1-1	15	1	1	1	1	1	1	1	1	1	1	1	1	1	1	1	15	1	1	1	1	1	1	1	1	1	1	1	1	1	1	1
0	35	0	1	1830	8	2	OK	0	0	0	0	0	0	1	born preterm	yes	1-1	15	1	1	1	1	1	1	1	1	1	1	1	1	1	1	1	15	1	1	1	1	1	1	1	1	1	1	1	1	1	1	1
1	35	0	1	2650	9	2	OK	0	0	0	0	0	0	1	born preterm	yes	1-1	15	1	1	1	1	1	1	1	1	1	1	1	1	1	1	1	15	1	1	1	1	1	1	1	1	1	1	1	1	1	1	1
0	35	0	1	1930	10	2	OK	0	0	0	0	0	0	1	born preterm	yes	0-0	0	0	0	0	0	0	0	0	0	0	0	0	0	0	0	0	0	0	0	0	0	0	0	0	0	0	0	0	0	0	0	0
1	36	0	1	2830	9	2	OK	0	0	0	0	0	0	1	born preterm	yes	0-0	2	0	0	0	0	0	0	0	0	0	0	0	0	0	1	1	0	0	0	0	0	0	0	0	0	0	0	0	0	0	0	0
1	36	0	1	2530	10	2	OK	0	0	0	0	0	0	1	born preterm	yes	0-0	8	1	0	0	0	0	1	1	0	0	0	1	1	1	1	1	11	0	0	0	0	1	1	1	1	1	1	1	1	1	1	1
0	36	0	1	2770	10	2	OK	0	0	0	0	0	0	1	born preterm	yes	0-0	13	1	0	0	1	1	1	1	1	1	1	1	1	1	1	1	12	0	1	0	0	1	1	1	1	1	1	1	1	1	1	1
0	36	0	1	3130	10	2	OK	0	0	0	0	0	0	1	born preterm	yes	1-1	15	1	1	1	1	1	1	1	1	1	1	1	1	1	1	1	15	1	1	1	1	1	1	1	1	1	1	1	1	1	1	1
0	36	0	1	2770	10	2	OK	0	0	0	0	0	0	1	born preterm	yes	0-0	13	1	0	0	1	1	1	1	1	1	1	1	1	1	1	1	12	0	1	0	0	1	1	1	1	1	1	1	1	1	1	1
1	36	0	1	2530	10	2	OK	0	0	0	0	0	0	1	born preterm	yes	0-0	8	1	0	0	0	0	1	1	0	0	0	1	1	1	1	1	11	0	0	0	0	1	1	1	1	1	1	1	1	1	1	1
1	36	0	1	2920	10	2	OK	0	0	0	0	0	0	1	born preterm	yes	1-1	15	1	1	1	1	1	1	1	1	1	1	1	1	1	1	1	15	1	1	1	1	1	1	1	1	1	1	1	1	1	1	1
0	36	0	1	2970	8	2	OK	0	0	0	0	0	0	1	born preterm	yes	1-1	15	1	1	1	1	1	1	1	1	1	1	1	1	1	1	1	15	1	1	1	1	1	1	1	1	1	1	1	1	1	1	1
1	36	0	1	2340	10	2	OK	0	0	0	0	0	0	1	born preterm	yes	1-1	15	1	1	1	1	1	1	1	1	1	1	1	1	1	1	1	15	1	1	1	1	1	1	1	1	1	1	1	1	1	1	1
1	36	0	1	3520	10	2	OK	0	0	0	0	0	0	1	born preterm	yes	1-1	15	1	1	1	1	1	1	1	1	1	1	1	1	1	1	1	15	1	1	1	1	1	1	1	1	1	1	1	1	1	1	1
0	36	0	1	3130	10	2	OK	0	0	0	0	0	0	1	born preterm	yes	1-1	15	1	1	1	1	1	1	1	1	1	1	1	1	1	1	1	15	1	1	1	1	1	1	1	1	1	1	1	1	1	1	1
0	36	0	1	2600			1	1	0	0	0	0	0	2	born preterm	yes	0-0	0	0	0	0	0	0	0	0	0	0	0	0	0	0	0	0	0	0	0	0	0	0	0	0	0	0	0	0	0	0	0	0
0	37	0	1	2550	10	2	OK	0	0	0	0	0	0	1	born preterm	yes	0-0	9	1	0	0	1	1	1	1	0	0	0	0	1	1	1	1	11	1	0	0	0	1	1	1	1	1	1	0	1	1	1	1
0	37	0	1	3150	8	2	OK	0	0	0	0	0	0	1	born preterm	yes	0-0	7	0	0	0	0	0	1	1	0	0	0	1	1	1	1	1	9	0	0	0	0	1	1	1	1	1	1	1	1	1	1	1
1	37	0	1	2820	10	2	OK	0	0	0	0	0	0	1	born preterm	yes	0-0	6	0	0	0	1	1	1	1	0	0	0	0	0	0	1	1	6	0	0	0	0	1	1	1	1	1	1	0	0	0	0	0
0	37	0	1	2770	10	2	OK	0	0	0	0	0	0	1	born preterm	yes	0-0	9	0	0	1	1	1	1	1	0	0	0	0	1	1	1	1	11	0	0	0	1	1	1	1	1	1	1	0	1	1	1	1
0	37	0	1	2630	10	2	OK	0	0	0	0	0	0	1	born preterm	yes	1-1	15	1	1	1	1	1	1	1	1	1	1	1	1	1	1	1	15	1	1	1	1	1	1	1	1	1	1	1	1	1	1	1
0	37	0	1	3200	10	2	OK	0	0	0	0	0	0	1	born preterm	yes	1-1	15	1	1	1	1	1	1	1	1	1	1	1	1	1	1	1	15	1	1	1	1	1	1	1	1	1	1	1	1	1	1	1
1	37	0	1	2270	10	2	OK	0	0	0	0	0	0	1	born preterm	yes	1-1	15	1	1	1	1	1	1	1	1	1	1	1	1	1	1	1	15	1	1	1	1	1	1	1	1	1	1	1	1	1	1	1
0	37	0	1	2670	10	2	OK	0	0	0	0	0	0	1	born preterm	yes	1-1	12	0	1	0	1	1	1	1	0	1	1	1	1	1	1	1	12	0	0	0	1	1	1	1	1	1	1	1	1	1	1	1
1	37	0	1	3400	9	2	OK	0	0	0	0	0	0	1	born preterm	yes	1-1	15	1	1	1	1	1	1	1	1	1	1	1	1	1	1	1	15	1	1	1	1	1	1	1	1	1	1	1	1	1	1	1
0	37	0	1	2950	9	2	OK	0	0	0	0	0	0	1	born preterm	yes	1-1	15	1	1	1	1	1	1	1	1	1	1	1	1	1	1	1	15	1	1	1	1	1	1	1	1	1	1	1	1	1	1	1
1	37	0	1	3910	10	2	OK	0	0	0	0	0	0	1	born preterm	yes	1-1	15	1	1	1	1	1	1	1	1	1	1	1	1	1	1	1	15	1	1	1	1	1	1	1	1	1	1	1	1	1	1	1
0	37	0	1	2370	10	2	OK	0	0	0	0	0	0	1	born preterm	yes	1-1	15	1	1	1	1	1	1	1	1	1	1	1	1	1	1	1	15	1	1	1	1	1	1	1	1	1	1	1	1	1	1	1
1	37	0	1	3900	10	2	OK	0	0	0	0	0	0	1	born preterm	yes	1-1	15	1	1	1	1	1	1	1	1	1	1	1	1	1	1	1	15	1	1	1	1	1	1	1	1	1	1	1	1	1	1	1
1	37	0	1	3100	9	2	OK	0	0	0	0	0	0	1	born preterm	yes	1-0	13	0	1	1	1	1	1	1	0	1	1	1	1	1	1	1	13	0	0	1	1	1	1	1	1	1	1	1	1	1	1	1
0	37	0	1	3140	10	2	OK	0	0	0	0	0	0	1	born preterm	yes	1-1	15	1	1	1	1	1	1	1	1	1	1	1	1	1	1	1	15	1	1	1	1	1	1	1	1	1	1	1	1	1	1	1
1	37	0	1	3440	10	2	OK	0	0	0	0	0	0	1	born preterm	yes	0-0	13	0	0	1	1	1	1	1	1	1	1	1	1	1	1	1	9	0	0	0	1	1	1	1	0	0	0	1	1	1	1	1
0	37	0	1	3200	10	2	OK	0	0	0	0	0	0	1	born preterm	yes	1-1	15	1	1	1	1	1	1	1	1	1	1	1	1	1	1	1	15	1	1	1	1	1	1	1	1	1	1	1	1	1	1	1
1	37	0	1	3280	10	2	OK	0	0	0	0	0	0	1	born preterm+APGAR	yes	1-1	15	1	1	1	1	1	1	1	1	1	1	1	1	1	1	1	15	1	1	1	1	1	1	1	1	1	1	1	1	1	1	1
0	37	0	1	2400	8	2	OK	0	0	0	0	0	0	1	born preterm	yes	1-1	15	1	1	1	1	1	1	1	1	1	1	1	1	1	1	1	15	1	1	1	1	1	1	1	1	1	1	1	1	1	1	1
0	37	0	1	3800	10	2	OK	0	0	0	0	0	0	1	born preterm	yes	1-1	15	1	1	1	1	1	1	1	1	1	1	1	1	1	1	1	15	1	1	1	1	1	1	1	1	1	1	1	1	1	1	1
1	37	0	1	2480	10	2	OK	0	0	0	0	0	0	1	born preterm	yes	1-1	15	1	1	1	1	1	1	1	1	1	1	1	1	1	1	1	15	1	1	1	1	1	1	1	1	1	1	1	1	1	1	1
1	37	0	1	2490	10	2	OK	0	0	0	0	0	0	1	born preterm	yes	1-1	15	1	1	1	1	1	1	1	1	1	1	1	1	1	1	1	15	1	1	1	1	1	1	1	1	1	1	1	1	1	1	1
1	37	0	1	3580	10	2	OK	0	0	0	0	0	0	1	born preterm	yes	1-1	15	1	1	1	1	1	1	1	1	1	1	1	1	1	1	1	15	1	1	1	1	1	1	1	1	1	1	1	1	1	1	1
1	37	0	1	3170	10	2	OK	0	0	0	0	0	0	1	born preterm	yes	1-1	15	1	1	1	1	1	1	1	1	1	1	1	1	1	1	1	15	1	1	1	1	1	1	1	1	1	1	1	1	1	1	1
1	37	0	1	3170	10	2	OK	0	0	0	0	0	0	1	born preterm	yes	1-1	15	1	1	1	1	1	1	1	1	1	1	1	1	1	1	1	15	1	1	1	1	1	1	1	1	1	1	1	1	1	1	1
0	37	0	1	3450	10	2	OK	0	0	0	0	0	0	1	born preterm	yes	1-1	15	1	1	1	1	1	1	1	1	1	1	1	1	1	1	1	15	1	1	1	1	1	1	1	1	1	1	1	1	1	1	1
1	37	0	1	2870	9	2	OK	0	0	0	0	0	0	1	born preterm	yes	1-1	15	1	1	1	1	1	1	1	1	1	1	1	1	1	1	1	15	1	1	1	1	1	1	1	1	1	1	1	1	1	1	1
0	37	0	1	2400	8	2	OK	0	0	0	0	0	0	1	born preterm	yes	1-1	15	1	1	1	1	1	1	1	1	1	1	1	1	1	1	1	15	1	1	1	1	1	1	1	1	1	1	1	1	1	1	1
0	37	0	1	2370	10	2	OK	0	0	0	0	0	0	1	born preterm	yes	1-1	15	1	1	1	1	1	1	1	1	1	1	1	1	1	1	1	15	1	1	1	1	1	1	1	1	1	1	1	1	1	1	1
1	37	0	1	3900	10	2	OK	0	0	0	0	0	0	1	born preterm	yes	1-1	15	1	1	1	1	1	1	1	1	1	1	1	1	1	1	1	15	1	1	1	1	1	1	1	1	1	1	1	1	1	1	1
0	37	0	1	2770	10	2	OK	0	0	0	0	0	0	1	born preterm	yes	1-1	15	1	1	1	1	1	1	1	1	1	1	1	1	1	1	1	15	1	1	1	1	1	1	1	1	1	1	1	1	1	1	1
0	37	0	1	2950	9	2	OK	0	0	0	0	0	0	1	born preterm	yes	1-1	15	1	1	1	1	1	1	1	1	1	1	1	1	1	1	1	15	1	1	1	1	1	1	1	1	1	1	1	1	1	1	1
1	37	0	1	3400	9	2	OK	0	0	0	0	0	0	1	born preterm	yes	1-1	15	1	1	1	1	1	1	1	1	1	1	1	1	1	1	1	15	1	1	1	1	1	1	1	1	1	1	1	1	1	1	1
1	36	0	1	2110	10	2	OK	0	0	0	0	1	0	2	born preterm+hipo	yes	0-0	2	0	0	0	0	0	0	0	0	0	0	0	0	0	1	1	0	0	0	0	0	0	0	0	0	0	0	0	0	0	0	0
0	37	0	1	1340	10	2	OK	0	0	0	0	1	0	2	born preterm+hipo	yes	0-0	0	0	0	0	0	0	0	0	0	0	0	0	0	0	0	0	6	0	0	0	0	1	1	1	1	1	1	0	0	0	0	0
0	37	0	1	1340	10	2	OK	0	0	0	0	1	0	2	born preterm+hipo	yes	0-0	0	0	0	0	0	0	0	0	0	0	0	0	0	0	0	0	6	0	0	0	0	1	1	1	1	1	1	0	0	0	0	0
0	34	0	1	1650	9	2	OK	0	0	0	0	1	1	3	born preterm+hipo+hyper	yes	0-0	0	0	0	0	0	0	0	0	0	0	0	0	0	0	0	0	0	0	0	0	0	0	0	0	0	0	0	0	0	0	0	0
0	33	0	1	1290	10	2	OK	0	0	0	0	0	1	2	born preterm+hyper	yes	0-1	13	1	0	1	1	1	1	1	1	0	1	1	1	1	1	1	15	1	1	1	1	1	1	1	1	1	1	1	1	1	1	1
0	33	0	1	1710	10	2	OK	0	0	0	0	0	1	2	born preterm+hyper	yes	1-1	15	1	1	1	1	1	1	1	1	1	1	1	1	1	1	1	15	1	1	1	1	1	1	1	1	1	1	1	1	1	1	1
0	33	0	1	1290	10	2	OK	0	0	0	0	0	1	2	born preterm+hyper	yes	0-1	13	1	0	1	1	1	1	1	1	0	1	1	1	1	1	1	15	1	1	1	1	1	1	1	1	1	1	1	1	1	1	1
0	33	0	1	1710	10	2	OK	0	0	0	0	0	1	2	born preterm+hyper	yes	1-1	15	1	1	1	1	1	1	1	1	1	1	1	1	1	1	1	15	1	1	1	1	1	1	1	1	1	1	1	1	1	1	1
0	34	0	1	2270	10	2	OK	0	0	0	0	0	1	2	born preterm+hyper	yes	0-0	1	0	1	0	0	0	0	0	0	0	0	0	0	0	0	0	9	1	0	0	0	1	1	1	1	1	1	0	1	1	0	0
0	34	0	1	2270	10	2	OK	0	0	0	0	0	1	2	born preterm+hyper	tak	0-0	1	0	1	0	0	0	0	0	0	0	0	0	0	0	0	0	9	1	0	0	0	1	1	1	1	1	1	0	1	1	0	0
0	34	0	1	2320	9	2	OK	0	0	0	0	0	1	2	born preterm+hyper	yes	0-0	0	0	0	0	0	0	0	0	0	0	0	0	0	0	0	0	0	0	0	0	0	0	0	0	0	0	0	0	0	0	0	0
1	34	0	1	2250	10	2	OK	0	0	0	0	0	1	2	born preterm+hyper	yes	1-1	15	1	1	1	1	1	1	1	1	1	1	1	1	1	1	1	15	1	1	1	1	1	1	1	1	1	1	1	1	1	1	1
0	35	0	1	2050	8	2	OK	0	0	0	0	0	1	2	born preterm+hyper	yes	0-0	0	0	0	0	0	0	0	0	0	0	0	0	0	0	0	0	0	0	0	0	0	0	0	0	0	0	0	0	0	0	0	0
0	37	0	1	3560	10	2	OK	0	0	0	0	0	1	2	born preterm+hyper	yes	0-0	8	0	0	0	1	1	1	1	0	0	0	0	1	1	1	1	9	1	0	0	0	1	1	1	1	1	1	0	1	1	0	0
1	31	0	1	1410	8	2	OK	0	1	1	0	0	0	2	born preterm+IVH	yes	0-0	11	1	0	0	0	0	1	1	1	1	1	1	1	1	1	1	11	0	0	0	0	1	1	1	1	1	1	1	1	1	1	1
1	35	0	1	2580	7	2	OK	0	1	1	0	0	0	2	born preterm+IVH	yes	0-0	6	0	0	0	1	1	1	1	0	0	0	0	0	0	1	1	6	0	0	0	0	1	1	1	1	1	1	0	0	0	0	0
0	35	0	1	2670	9	2	OK	0	1	1	0	0	0	2	born preterm+IVH	yes	0-1	7	1	0	0	1	1	0	0	0	0	0	0	1	1	1	1	6	1	0	0	0	0	0	0	0	0	0	1	1	1	1	1
1	35	0	1	2480	10	2	OK	0	1	2	0	0	0	2	born preterm+IVH	yes	0-1	9	1	0	0	0	0	1	1	1	0	0	1	1	1	1	1	9	1	1	0	0	0	0	1	1	0	0	1	1	1	1	1
0	35	0	1	1780	9	2	OK	0	1	2	0	0	0	2	born preterm+IVH	yes	1-1	15	1	1	1	1	1	1	1	1	1	1	1	1	1	1	1	15	1	1	1	1	1	1	1	1	1	1	1	1	1	1	1
0	35	0	1	1780	9	2	OK	0	1	2	0	0	0	2	born preterm+IVH	yes	1-1	15	1	1	1	1	1	1	1	1	1	1	1	1	1	1	1	15	1	1	1	1	1	1	1	1	1	1	1	1	1	1	1
1	30	0	1	740	7	1	1	1	1	2	0	1	0	4	born preterm+IVH+hipo+APGAR	yes	0-0	7	0	0	0	0	0	1	1	0	0	0	1	1	1	1	1	6	0	0	0	0	1	1	1	1	1	1	0	0	0	0	0
1	30	0	1	740	7	2	OK	0	1	2	0	1	0	3	born preterm+IVH+hipo	yes	0-0	7	0	0	0	0	0	1	1	0	0	0	1	1	1	1	1	6	0	0	0	0	1	1	1	1	1	1	0	0	0	0	0
0	33	0	1	1280	8	2	OK	0	1	2	0	1	1	4	born preterm+IVH+hipo+hyper	yes	0-0	5	0	1	0	1	0	1	0	0	0	0	0	0	0	1	1	4	0	0	1	0	1	0	1	0	1	0	0	0	0	0	0
0	32	0	1	1850	8	2	OK	0	1	2	0	0	1	3	born preterm+IVH+hyper	yes	0-0	0	0	0	0	0	0	0	0	0	0	0	0	0	0	0	0	0	0	0	0	0	0	0	0	0	0	0	0	0	0	0	0
0	34	0	1	1780	9	2	OK	0	1	2	0	0	1	3	born preterm+IVH+hyper	yes	0-0	0	0	0	0	0	0	0	0	0	0	0	0	0	0	0	0	2	0	0	0	0	0	0	1	1	0	0	0	0	0	0	0
0	34	0	1	2040	8	2	OK	0	0	0	1	0	1	3	born preterm+IVH+hyper	yes	1-1	12	0	1	1	1	1	1	1	0	0	1	1	1	1	1	1	15	1	1	1	1	1	1	1	1	1	1	1	1	1	1	1
1	36	0	1	2700	10	2	OK	0	0	0	1	0	1	3	born preterm+IVH+hyper	yes	1-1	15	1	1	1	1	1	1	1	1	1	1	1	1	1	1	1	15	1	1	1	1	1	1	1	1	1	1	1	1	1	1	1
1	37	0	1	2850	9	2	OK	0	1	1	0	0	1	3	born preterm+IVH+hyper	yes	0-0	2	0	0	0	0	0	0	0	0	0	0	0	0	0	1	1	7	0	0	0	0	1	1	1	0	1	1	0	1	1	0	0
1	25	0	1	550	7	2	OK	0	1	1	1	0	0	3	born preterm+IVH+RDS	yes	0-0	0	0	0	0	0	0	0	0	0	0	0	0	0	0	0	0	0	0	0	0	0	0	0	0	0	0	0	0	0	0	0	0
1	26	0	1	790	3	0	1	1	1	3	1	0	0	4	born preterm+IVH+RDS+APGAR	yes	0-0	4	0	0	0	0	0	0	0	0	0	0	0	1	1	1	1	4	0	0	0	0	0	0	1	1	1	1	0	0	0	0	0
0	26	0	1	700	8	2	OK	0	1	3	1	0	0	3	born preterm+IVH+RDS	yes	0-1	6	0	0	0	0	0	1	1	0	0	0	0	1	1	1	1	13	0	0	1	1	1	1	1	1	1	1	1	1	1	1	1
0	26	0	1	930	7	2	OK	0	1	3	1	0	0	3	born preterm+IVH+RDS	yes	1-1	15	1	1	1	1	1	1	1	1	1	1	1	1	1	1	1	15	1	1	1	1	1	1	1	1	1	1	1	1	1	1	1
0	27	0	1	1110	8	2	OK	0	1	2	1	0	0	3	born preterm+IVH+RDS	yes	0-0	0	0	0	0	0	0	0	0	0	0	0	0	0	0	0	0	0	0	0	0	0	0	0	0	0	0	0	0	0	0	0	0
0	30	0	1	1470	8	2	OK	0	1	1	1	0	0	3	born preterm+IVH+RDS	yes	1-1	15	1	1	1	1	1	1	1	1	1	1	1	1	1	1	1	15	1	1	1	1	1	1	1	1	1	1	1	1	1	1	1
0	31	0	1	1700	8	2	OK	0	1	2	1	0	0	3	born preterm+IVH+RDS	yes	1-1	15	1	1	1	1	1	1	1	1	1	1	1	1	1	1	1	15	1	1	1	1	1	1	1	1	1	1	1	1	1	1	1
1	35	0	1	2215	4	1	1	1	1	3	1	0	0	4	born preterm+IVH+RDS+APGAR	yes	0-1	9	0	0	0	1	1	1	1	0	0	0	1	1	1	1	1	15	1	1	1	1	1	1	1	1	1	1	1	1	1	1	1
1	35	0	1	2530	8	2	OK	0	1	3	1	0	0	3	born preterm+IVH+RDS	yes	0-0	0	0	0	0	0	0	0	0	0	0	0	0	0	0	0	0	0	0	0	0	0	0	0	0	0	0	0	0	0	0	0	0
1	35	0	1	2530	8	2	OK	0	1	3	1	0	0	3	born preterm+IVH+RDS	yes	0-0	0	0	0	0	0	0	0	0	0	0	0	0	0	0	0	0	6	0	0	0	0	0	0	1	1	0	0	0	1	1	1	1
1	28	0	1	1150	4	1	1	1	1	1	1	0	1	5	born preterm+IVH+RDS+hyper+APGAR	yes	0-0	0	0	0	0	0	0	0	0	0	0	0	0	0	0	0	0	0	0	0	0	0	0	0	0	0	0	0	0	0	0	0	0
1	29	0	1	910	6	1	1	1	1	2	1	0	1	5	born preterm+IVH+RDS+hyper+APGAR	yes	0-0	0	0	0	0	0	0	0	0	0	0	0	0	0	0	0	0	0	0	0	0	0	0	0	0	0	0	0	0	0	0	0	0
1	30	0	1	1080	9	2	OK	0	1	1	1	0	1	4	born preterm+IVH+RDS+hyper	yes	1-0	15	1	1	1	1	1	1	1	1	1	1	1	1	1	1	1	11	1	0	1	1	1	1	1	1	1	1	0	1	1	0	0
0	36	0	1	2650	10	2	OK	0	1	1	1	0	1	4	born preterm+IVH+RDS+hyper	yes	0-0	0	0	0	0	0	0	0	0	0	0	0	0	0	0	0	0	0	0	0	0	0	0	0	0	0	0	0	0	0	0	0	0
1	29	0	1	835	6	1	1	1	0	0	1	0	0	3	born preterm+RDS+APGAR	yes	0-0	8	0	0	0	0	0	1	1	1	0	0	1	1	1	1	1	12	0	1	0	0	1	1	1	1	1	1	1	1	1	1	1
0	29	0	1	835	6	1	1	1	0	0	1	0	0	3	born preterm+RDS+APGAR	yes	0-0	8	0	0	0	0	0	1	1	1	0	0	1	1	1	1	1	12	0	1	0	0	1	1	1	1	1	1	1	1	1	1	1
0	30	0	1	1260	8	2	OK	0	0	0	1	0	0	2	born preterm+RDS	yes	1-1	15	1	1	1	1	1	1	1	1	1	1	1	1	1	1	1	15	1	1	1	1	1	1	1	1	1	1	1	1	1	1	1
0	31	0	1	1150	4	1	1	1	0	0	1	0	0	3	born preterm+RDS+APGAR	yes	0-0	4	0	0	0	1	1	1	1	0	0	0	0	0	0	0	0	4	0	0	0	0	0	0	1	1	1	1	0	0	0	0	0
0	31	0	1	1950	7	1	1	1	0	0	1	0	0	3	born preterm+RDS+APGAR	yes	1-1	15	1	1	1	1	1	1	1	1	1	1	1	1	1	1	1	15	1	1	1	1	1	1	1	1	1	1	1	1	1	1	1
1	31	0	1	1770	6	1	1	1	0	0	1	0	0	3	born preterm+RDS+APGAR	yes	1-1	15	1	1	1	1	1	1	1	1	1	1	1	1	1	1	1	15	1	1	1	1	1	1	1	1	1	1	1	1	1	1	1
0	34	0	1	1620	7	2	OK	0	0	0	1	1	1	4	born preterm+RDS+hipo+hyper	yes	0-0	0	0	0	0	0	0	0	0	0	0	0	0	0	0	0	0	0	0	0	0	0	0	0	0	0	0	0	0	0	0	0	0
1	37	1	0	3440	10	2	OK	0	0	0	0	0	0	0		no	0-0	13	0	0	1	1	1	1	1	1	1	1	1	1	1	1	1	9	0	0	0	1	1	1	1	0	0	0	1	1	1	1	1
0	38	1	0	2070	10	2	OK	0	0	0	0	0	0	0		no	0-0	7	1	0	0	1	1	1	1	0	0	0	0	0	0	1	1	9	1	0	0	0	1	1	1	1	1	1	0	1	1	0	0
1	38	1	0	3750	9	2	OK	0	0	0	0	0	0	0		no	0-0	4	0	0	0	0	0	0	0	0	0	0	0	1	1	1	1	7	0	0	0	0	1	1	0	1	1	1	0	1	1	0	0
1	38	1	0	2950	10	2	OK	0	0	0	0	0	0	0		no	0-0	6	1	0	0	1	1	1	1	0	0	0	0	0	0	1	0	11	0	0	1	0	1	1	1	1	1	1	0	1	1	1	1
0	38	1	0	3840	10	2	OK	0	0	0	0	0	0	0		no	1-1	15	1	1	1	1	1	1	1	1	1	1	1	1	1	1	1	15	1	1	1	1	1	1	1	1	1	1	1	1	1	1	1
1	38	1	0	3650	9	2	OK	0	0	0	0	0	0	0		no	0-1	10	0	0	0	1	1	1	1	1	0	0	1	1	1	1	1	15	1	1	1	1	1	1	1	1	1	1	1	1	1	1	1
0	38	1	0	3100	9	2	OK	0	0	0	0	0	0	0		no	0-1	6	0	0	0	1	1	0	0	0	0	0	0	1	1	1	1	7	1	0	0	0	1	1	1	1	1	1	0	0	0	0	0
0	38	1	0	3040	10	2	OK	0	0	0	0	0	0	0		no	0-0	9	0	0	0	1	1	1	1	0	0	0	1	1	1	1	1	11	0	0	0	0	1	1	1	1	1	1	1	1	1	1	1
0	38	1	0	3600	10	2	OK	0	0	0	0	0	0	0		no	0-0	9	0	0	0	1	1	1	1	0	0	0	1	1	1	1	1	11	0	0	0	0	1	1	1	1	1	1	1	1	1	1	1
0	38	1	0	2970	10	2	OK	0	0	0	0	0	0	0		no	1-1	15	1	1	1	1	1	1	1	1	1	1	1	1	1	1	1	15	1	1	1	1	1	1	1	1	1	1	1	1	1	1	1
1	38	1	0	3290	9	2	OK	0	0	0	0	0	0	0		no	0-0	11	1	0	0	1	1	1	1	1	0	0	1	1	1	1	1	14	1	1	1	0	1	1	1	1	1	1	1	1	1	1	1
1	38	1	0	3050	10	2	OK	0	0	0	0	0	0	0		no	1-1	15	1	1	1	1	1	1	1	1	1	1	1	1	1	1	1	15	1	1	1	1	1	1	1	1	1	1	1	1	1	1	1
1	38	1	0	3430	8	2	OK	0	0	0	0	0	0	0		no	0-1	11	1	0	0	1	1	1	1	1	0	0	1	1	1	1	1	13	1	1	0	0	1	1	1	1	1	1	1	1	1	1	1
1	38	1	0	3330	10	2	OK	0	0	0	0	0	0	0		no	0-0	9	0	1	0	1	1	1	1	0	1	0	0	1	0	1	1	12	0	0	1	1	1	1	1	1	1	1	0	1	1	1	1
0	38	1	0	3480	10	2	OK	0	0	0	0	0	0	0		no	1-1	15	1	1	1	1	1	1	1	1	1	1	1	1	1	1	1	15	1	1	1	1	1	1	1	1	1	1	1	1	1	1	1
0	38	1	0	3090	10	2	OK	0	0	0	0	0	0	0		no	1-1	15	1	1	1	1	1	1	1	1	1	1	1	1	1	1	1	15	1	1	1	1	1	1	1	1	1	1	1	1	1	1	1
1	38	1	0	2790	10	2	OK	0	0	0	0	0	0	0		no	0-0	10	0	1	0	1	1	1	1	0	1	0	0	1	1	1	1	12	0	0	1	0	1	1	1	1	1	1	1	1	1	1	1
0	38	1	0	3200	10	2	OK	0	0	0	0	0	0	0		no	1-1	15	1	1	1	1	1	1	1	1	1	1	1	1	1	1	1	15	1	1	1	1	1	1	1	1	1	1	1	1	1	1	1
1	38	1	0	3440	10	2	OK	0	0	0	0	0	0	0		no	1-1	15	1	1	1	1	1	1	1	1	1	1	1	1	1	1	1	15	1	1	1	1	1	1	1	1	1	1	1	1	1	1	1
0	38	1	0	3080	10	2	OK	0	0	0	0	0	0	0		no	1-0	15	1	1	1	1	1	1	1	1	1	1	1	1	1	1	1	13	0	0	1	1	1	1	1	1	1	1	1	1	1	1	1
1	38	1	0	3650	9	2	OK	0	0	0	0	0	0	0		no	0-1	10	0	0	0	1	1	1	1	1	0	0	1	1	1	1	1	15	1	1	1	1	1	1	1	1	1	1	1	1	1	1	1
0	38	1	0	3580	10	2	OK	0	0	0	0	0	0	0		no	1-1	15	1	1	1	1	1	1	1	1	1	1	1	1	1	1	1	15	1	1	1	1	1	1	1	1	1	1	1	1	1	1	1
0	38	1	0	3510	10	2	OK	0	0	0	0	0	0	0		no	1-1	15	1	1	1	1	1	1	1	1	1	1	1	1	1	1	1	15	1	1	1	1	1	1	1	1	1	1	1	1	1	1	1
0	38	1	0	3150	10	2	OK	0	0	0	0	0	0	0		no	0-1	9	1	0	0	0	0	1	1	1	0	0	1	1	1	1	1	15	1	1	1	1	1	1	1	1	1	1	1	1	1	1	1
0	38	1	0	3010	9	2	OK	0	0	0	0	0	0	0		no	0-1	9	1	0	0	0	0	1	1	1	0	0	1	0	0	0	0	15	1	1	1	1	1	1	1	1	1	1	1	1	1	1	1
0	38	1	0	4310	10	2	OK	0	0	0	0	0	0	0		no	1-1	15	1	1	1	1	1	1	1	1	1	1	1	1	1	1	1	15	1	1	1	1	1	1	1	1	1	1	1	1	1	1	1
0	38	1	0	3050	10	2	OK	0	0	0	0	0	0	0		no	1-1	15	1	1	1	1	1	1	1	1	1	1	1	1	1	1	1	15	1	1	1	1	1	1	1	1	1	1	1	1	1	1	1
1	38	1	0	2900	10	2	OK	0	0	0	0	0	0	0		no	1-1	15	1	1	1	1	1	1	1	1	1	1	1	1	1	1	1	15	1	1	1	1	1	1	1	1	1	1	1	1	1	1	1
0	38	1	0	3090	10	2	OK	0	0	0	0	0	0	0		no	1-1	15	1	1	1	1	1	1	1	1	1	1	1	1	1	1	1	15	1	1	1	1	1	1	1	1	1	1	1	1	1	1	1
1	38	1	0	3360	10	2	OK	0	0	0	0	0	0	0		no	1-1	15	1	1	1	1	1	1	1	1	1	1	1	1	1	1	1	15	1	1	1	1	1	1	1	1	1	1	1	1	1	1	1
0	38	1	0	3770	9	2	OK	0	0	0	0	0	0	0		no	1-1	15	1	1	1	1	1	1	1	1	1	1	1	1	1	1	1	15	1	1	1	1	1	1	1	1	1	1	1	1	1	1	1
0	38	1	0	3040	10	2	OK	0	0	0	0	0	0	0		no	1-1	15	1	1	1	1	1	1	1	1	1	1	1	1	1	1	1	15	1	1	1	1	1	1	1	1	1	1	1	1	1	1	1
1	38	1	0	1970	10	2	OK	0	0	0	0	0	0	0		no	1-1	15	1	1	1	1	1	1	1	1	1	1	1	1	1	1	1	15	1	1	1	1	1	1	1	1	1	1	1	1	1	1	1
0	38	1	0	3610	10	2	OK	0	0	0	0	0	0	0		no	1-1	15	1	1	1	1	1	1	1	1	1	1	1	1	1	1	1	15	1	1	1	1	1	1	1	1	1	1	1	1	1	1	1
0	38	1	0	3530	10	2	OK	0	0	0	0	0	0	0		no	1-1	15	1	1	1	1	1	1	1	1	1	1	1	1	1	1	1	15	1	1	1	1	1	1	1	1	1	1	1	1	1	1	1
0	38	1	0	3480	10	2	OK	0	0	0	0	0	0	0		no	1-1	15	1	1	1	1	1	1	1	1	1	1	1	1	1	1	1	15	1	1	1	1	1	1	1	1	1	1	1	1	1	1	1
1	38	1	0	3600	9	2	OK	0	0	0	0	0	0	0		no	1-1	15	1	1	1	1	1	1	1	1	1	1	1	1	1	1	1	15	1	1	1	1	1	1	1	1	1	1	1	1	1	1	1
0	38	1	0	3220	10	2	OK	0	0	0	0	0	0	0		no	1-1	15	1	1	1	1	1	1	1	1	1	1	1	1	1	1	1	15	1	1	1	1	1	1	1	1	1	1	1	1	1	1	1
1	38	1	0	4480	10	2	OK	0	0	0	0	0	0	0		no	1-1	15	1	1	1	1	1	1	1	1	1	1	1	1	1	1	1	15	1	1	1	1	1	1	1	1	1	1	1	1	1	1	1
0	38	1	0	3100	9	2	OK	0	0	0	0	0	0	0		no	1-1	15	1	1	1	1	1	1	1	1	1	1	1	1	1	1	1	15	1	1	1	1	1	1	1	1	1	1	1	1	1	1	1
0	38	1	0	3300	10	2	OK	0	0	0	0	0	0	0		no	1-1	15	1	1	1	1	1	1	1	1	1	1	1	1	1	1	1	15	1	1	1	1	1	1	1	1	1	1	1	1	1	1	1
0	38	1	0	3140	9	2	OK	0	0	0	0	0	0	0		no	1-1	15	1	1	1	1	1	1	1	1	1	1	1	1	1	1	1	15	1	1	1	1	1	1	1	1	1	1	1	1	1	1	1
0	38	1	0	3100	9	2	OK	0	0	0	0	0	0	0		no	1-1	15	1	1	1	1	1	1	1	1	1	1	1	1	1	1	1	15	1	1	1	1	1	1	1	1	1	1	1	1	1	1	1
0	38	1	0	3300	10	2	OK	0	0	0	0	0	0	0		no	1-1	15	1	1	1	1	1	1	1	1	1	1	1	1	1	1	1	15	1	1	1	1	1	1	1	1	1	1	1	1	1	1	1
0	38	1	0	3140	9	2	OK	0	0	0	0	0	0	0		no	1-1	15	1	1	1	1	1	1	1	1	1	1	1	1	1	1	1	15	1	1	1	1	1	1	1	1	1	1	1	1	1	1	1
0	38	1	0	3700	10	2	OK	0	0	0	0	0	0	0		no	1-1	15	1	1	1	1	1	1	1	1	1	1	1	1	1	1	1	15	1	1	1	1	1	1	1	1	1	1	1	1	1	1	1
1	38	1	0	3510	10	2	OK	0	0	0	0	0	0	0		no	1-1	15	1	1	1	1	1	1	1	1	1	1	1	1	1	1	1	15	1	1	1	1	1	1	1	1	1	1	1	1	1	1	1
0	38	1	0	3400	10	2	OK	0	0	0	0	0	0	0		no	1-1	15	1	1	1	1	1	1	1	1	1	1	1	1	1	1	1	15	1	1	1	1	1	1	1	1	1	1	1	1	1	1	1
0	38	1	0	3620	10	2	OK	0	0	0	0	0	0	0		no	1-1	15	1	1	1	1	1	1	1	1	1	1	1	1	1	1	1	15	1	1	1	1	1	1	1	1	1	1	1	1	1	1	1
0	38	1	0	4310	10	2	OK	0	0	0	0	0	0	0		no	1-1	15	1	1	1	1	1	1	1	1	1	1	1	1	1	1	1	15	1	1	1	1	1	1	1	1	1	1	1	1	1	1	1
0	38	1	0	3480	10	2	OK	0	0	0	0	0	0	0		no	1-1	15	1	1	1	1	1	1	1	1	1	1	1	1	1	1	1	15	1	1	1	1	1	1	1	1	1	1	1	1	1	1	1
0	38	1	0	2970	10	2	OK	0	0	0	0	0	0	0		no	1-1	15	1	1	1	1	1	1	1	1	1	1	1	1	1	1	1	15	1	1	1	1	1	1	1	1	1	1	1	1	1	1	1
0	39	1	0	3580	10	2	OK	0	0	0	0	0	0	0		no	0-1	9	0	0	0	1	1	1	1	0	0	0	1	1	1	1	1	12	1	0	0	0	1	1	1	1	1	1	1	1	1	1	1
1	39	1	0	2990	10	2	OK	0	0	0	0	0	0	0		no	0-0	0	0	0	0	0	0	0	0	0	0	0	0	0	0	0	0	0	0	0	0	0	0	0	0	0	0	0	0	0	0	0	0
0	39	1	0	3470	10	2	OK	0	0	0	0	0	0	0		no	0-0	11	1	0	0	1	1	1	1	1	0	0	1	1	1	1	1	13	1	1	0	0	1	1	1	1	1	1	1	1	1	1	1
0	39	1	0	3230	10	2	OK	0	0	0	0	0	0	0		no	0-0	6	0	0	0	1	1	1	1	0	0	0	0	0	0	1	1	11	1	0	1	1	1	1	1	1	1	1	0	0	0	1	1
0	39	1	0	3980	10	2	OK	0	0	0	0	0	0	0		no	0-0	6	0	0	0	1	1	1	1	0	0	0	0	0	0	1	1	6	0	0	0	0	1	1	1	1	1	1	0	0	0	0	0
0	39	1	0	3480	10	2	OK	0	0	0	0	0	0	0		no	1-1	15	1	1	1	1	1	1	1	1	1	1	1	1	1	1	1	15	1	1	1	1	1	1	1	1	1	1	1	1	1	1	1
0	39	1	0	3470	10	2	OK	0	0	0	0	0	0	0		no	0-0	6	0	0	0	1	1	1	1	0	0	0	0	0	0	1	1	10	0	0	1	1	1	1	1	1	1	1	0	0	0	1	1
1	39	1	0	3660	10	2	OK	0	0	0	0	0	0	0		no	0-0	2	0	0	0	0	0	1	1	0	0	0	0	0	0	0	1	8	0	0	0	0	1	1	1	1	1	1	0	1	1	0	0
0	39	1	0	3850	10	2	OK	0	0	0	0	0	0	0		no	0-0	7	0	0	0	1	1	1	1	0	0	0	0	0	1	1	1	9	0	0	0	0	1	1	1	1	1	1	0	1	1	1	0
0	39	1	0	3400	9	2	OK	0	0	0	0	0	0	0		no	0-0	8	1	0	1	1	1	1	1	0	0	0	0	0	0	1	1	6	0	0	0	0	1	1	1	1	1	1	0	0	0	0	0
0	39	1	0	3020	10	2	OK	0	0	0	0	0	0	0		no	0-0	0	0	0	0	0	0	1	1	0	0	0	0	1	1	1	1	11	1	0	1	1	1	1	1	1	1	1	0	0	1	1	0
1	39	1	0	3400	10	2	OK	0	0	0	0	0	0	0		no	0-0	0	0	0	0	0	0	0	0	0	0	0	0	0	0	0	0	0	0	0	0	0	0	0	0	0	0	0	0	0	0	0	0
1	39	1	0	3450	9	2	OK	0	0	0	0	0	0	0		no	1-1	15	1	1	1	1	1	1	1	1	1	1	1	1	1	1	1	15	1	1	1	1	1	1	1	1	1	1	1	1	1	1	1
0	39	1	0	3540	10	2	OK	0	0	0	0	0	0	0		no	1-1	15	1	1	1	1	1	1	1	1	1	1	1	1	1	1	1	15	1	1	1	1	1	1	1	1	1	1	1	1	1	1	1
0	39	1	0	3030	10	2	OK	0	0	0	0	0	0	0		no	1-1	15	1	1	1	1	1	1	1	1	1	1	1	1	1	1	1	15	1	1	1	1	1	1	1	1	1	1	1	1	1	1	1
1	39	1	0	3380	9	2	OK	0	0	0	0	0	0	0		no	1-0	13	0	0	0	1	1	1	1	1	1	1	1	1	1	1	1	8	0	0	0	1	1	1	1	0	0	0	0	1	1	1	1
1	39	1	0	3300	10	2	OK	0	0	0	0	0	0	0		no	1-1	15	1	1	1	1	1	1	1	1	1	1	1	1	1	1	1	15	1	1	1	1	1	1	1	1	1	1	1	1	1	1	1
1	39	1	0	3750	10	2	OK	0	0	0	0	0	0	0		no	1-1	15	1	1	1	1	1	1	1	1	1	1	1	1	1	1	1	15	1	1	1	1	1	1	1	1	1	1	1	1	1	1	1
0	39	1	0	3500	9	2	OK	0	0	0	0	0	0	0		no	1-1	15	1	1	1	1	1	1	1	1	1	1	1	1	1	1	1	15	1	1	1	1	1	1	1	1	1	1	1	1	1	1	1
0	39	1	0	2780	10	2	OK	0	0	0	0	0	0	0		no	1-1	15	1	1	1	1	1	1	1	1	1	1	1	1	1	1	1	15	1	1	1	1	1	1	1	1	1	1	1	1	1	1	1
1	39	1	0	3370	10	2	OK	0	0	0	0	0	0	0		no	1-1	15	1	1	1	1	1	1	1	1	1	1	1	1	1	1	1	15	1	1	1	1	1	1	1	1	1	1	1	1	1	1	1
1	39	1	0	3660	10	2	OK	0	0	0	0	0	0	0		no	0-0	2	0	0	0	0	0	1	1	0	0	0	0	0	0	0	1	8	0	0	0	0	1	1	1	1	1	1	0	1	1	0	0
0	39	1	0	3820	10	2	OK	0	0	0	0	0	0	0		no	1-1	15	1	1	1	1	1	1	1	1	1	1	1	1	1	1	1	15	1	1	1	1	1	1	1	1	1	1	1	1	1	1	1
0	39	1	0	2770	10	2	OK	0	0	0	0	0	0	0		no	1-1	15	1	1	1	1	1	1	1	1	1	1	1	1	1	1	1	15	1	1	1	1	1	1	1	1	1	1	1	1	1	1	1
0	39	1	0	3850	10	2	OK	0	0	0	0	0	0	0		no	1-1	15	1	1	1	1	1	1	1	1	1	1	1	1	1	1	1	15	1	1	1	1	1	1	1	1	1	1	1	1	1	1	1
0	39	1	0	2500	10	2	OK	0	0	0	0	0	0	0		no	1-1	15	1	1	1	1	1	1	1	1	1	1	1	1	1	1	1	15	1	1	1	1	1	1	1	1	1	1	1	1	1	1	1
1	39	1	0	3800	10	2	OK	0	0	0	0	0	0	0		no	1-1	15	1	1	1	1	1	1	1	1	1	1	1	1	1	1	1	15	1	1	1	1	1	1	1	1	1	1	1	1	1	1	1
0	39	1	0	3850	10	2	OK	0	0	0	0	0	0	0		no	1-1	15	1	1	1	1	1	1	1	1	1	1	1	1	1	1	1	15	1	1	1	1	1	1	1	1	1	1	1	1	1	1	1
0	39	1	0	3750	10	2	OK	0	0	0	0	0	0	0		no	0-0	12	1	1	0	1	1	1	1	0	1	0	1	1	1	1	1	13	0	0	1	1	1	1	1	1	1	1	1	1	1	1	1
1	39	1	0	3730	9	2	OK	0	0	0	0	0	0	0		no	1-1	15	1	1	1	1	1	1	1	1	1	1	1	1	1	1	1	15	1	1	1	1	1	1	1	1	1	1	1	1	1	1	1
1	39	1	0	3290	10	2	OK	0	0	0	0	0	0	0		no	1-1	15	1	1	1	1	1	1	1	1	1	1	1	1	1	1	1	15	1	1	1	1	1	1	1	1	1	1	1	1	1	1	1
0	39	1	0	3570	10	2	OK	0	0	0	0	0	0	0		no	1-1	15	1	1	1	1	1	1	1	1	1	1	1	1	1	1	1	15	1	1	1	1	1	1	1	1	1	1	1	1	1	1	1
0	39	1	0	3160	10	2	OK	0	0	0	0	0	0	0		no	1-1	15	1	1	1	1	1	1	1	1	1	1	1	1	1	1	1	15	1	1	1	1	1	1	1	1	1	1	1	1	1	1	1
0	39	1	0	3470	10	2	OK	0	0	0	0	0	0	0		no	0-0	11	1	0	0	1	1	1	1	1	0	0	1	1	1	1	1	13	1	1	0	0	1	1	1	1	1	1	1	1	1	1	1
0	39	1	0	3180	10	2	OK	0	0	0	0	0	0	0		no	0-0	11	0	1	0	1	1	1	1	0	1	0	1	1	1	1	1	12	0	0	1	0	1	1	1	1	1	1	1	1	1	1	1
0	39	1	0	3620	10	2	OK	0	0	0	0	0	0	0		no	1-1	15	1	1	1	1	1	1	1	1	1	1	1	1	1	1	1	15	1	1	1	1	1	1	1	1	1	1	1	1	1	1	1
1	39	1	0	3750	10	2	OK	0	0	0	0	0	0	0		no	0-0	10	1	0	0	1	1	1	1	0	0	0	1	1	1	1	1	13	1	1	0	0	1	1	1	1	1	1	1	1	1	1	1
0	39	1	0	3840	10	2	OK	0	0	0	0	0	0	0		no	1-1	15	1	1	1	1	1	1	1	1	1	1	1	1	1	1	1	15	1	1	1	1	1	1	1	1	1	1	1	1	1	1	1
0	39	1	0	3770	10	2	OK	0	0	0	0	0	0	0		no	1-1	11	1	0	0	1	1	1	1	1	0	0	1	1	1	1	1	15	1	1	1	1	1	1	1	1	1	1	1	1	1	1	1
0	39	1	0	2920	10	2	OK	0	0	0	0	0	0	0		no	1-1	15	1	1	1	1	1	1	1	1	1	1	1	1	1	1	1	15	1	1	1	1	1	1	1	1	1	1	1	1	1	1	1
0	39	1	0	3400	8	2	OK	0	0	0	0	0	0	0		no	1-1	15	1	1	1	1	1	1	1	1	1	1	1	1	1	1	1	15	1	1	1	1	1	1	1	1	1	1	1	1	1	1	1
1	39	1	0	3300	10	2	OK	0	0	0	0	0	0	0		no	1-1	15	1	1	1	1	1	1	1	1	1	1	1	1	1	1	1	15	1	1	1	1	1	1	1	1	1	1	1	1	1	1	1
1	39	1	0	3750	10	2	OK	0	0	0	0	0	0	0		no	1-1	15	1	1	1	1	1	1	1	1	1	1	1	1	1	1	1	15	1	1	1	1	1	1	1	1	1	1	1	1	1	1	1
1	39	1	0	3650	10	2	OK	0	0	0	0	0	0	0		no	1-1	15	1	1	1	1	1	1	1	1	1	1	1	1	1	1	1	15	1	1	1	1	1	1	1	1	1	1	1	1	1	1	1
1	39	1	0	3210	10	2	OK	0	0	0	0	0	0	0		no	1-1	15	1	1	1	1	1	1	1	1	1	1	1	1	1	1	1	15	1	1	1	1	1	1	1	1	1	1	1	1	1	1	1
0	39	1	0	3500	9	2	OK	0	0	0	0	0	0	0		no	1-1	15	1	1	1	1	1	1	1	1	1	1	1	1	1	1	1	15	1	1	1	1	1	1	1	1	1	1	1	1	1	1	1
0	39	1	0	3510	9	2	OK	0	0	0	0	0	0	0		no	1-1	15	1	1	1	1	1	1	1	1	1	1	1	1	1	1	1	15	1	1	1	1	1	1	1	1	1	1	1	1	1	1	1
0	39	1	0	3820	10	2	OK	0	0	0	0	0	0	0		no	1-1	15	1	1	1	1	1	1	1	1	1	1	1	1	1	1	1	15	1	1	1	1	1	1	1	1	1	1	1	1	1	1	1
1	39	1	0	3090	10	2	OK	0	0	0	0	0	0	0		no	0-1	11	1	0	0	1	1	1	1	1	0	0	1	1	1	1	1	15	1	1	1	1	1	1	1	1	1	1	1	1	1	1	1
0	39	1	0	3450	10	2	OK	0	0	0	0	0	0	0		no	0-1	9	1	0	0	0	0	1	1	1	0	0	1	1	1	1	1	15	1	1	1	1	1	1	1	1	1	1	1	1	1	1	1
1	39	1	0	3370	10	2	OK	0	0	0	0	0	0	0		no	1-1	15	1	1	1	1	1	1	1	1	1	1	1	1	1	1	1	15	1	1	1	1	1	1	1	1	1	1	1	1	1	1	1
1	39	1	0	3350	9	2	OK	0	0	0	0	0	0	0		no	1-1	15	1	1	1	1	1	1	1	1	1	1	1	1	1	1	1	15	1	1	1	1	1	1	1	1	1	1	1	1	1	1	1
1	39	1	0	3510	10	2	OK	0	0	0	0	0	0	0		no	1-1	15	1	1	1	1	1	1	1	1	1	1	1	1	1	1	1	15	1	1	1	1	1	1	1	1	1	1	1	1	1	1	1
0	39	1	0	3620	10	2	OK	0	0	0	0	0	0	0		no	1-1	15	1	1	1	1	1	1	1	1	1	1	1	1	1	1	1	15	1	1	1	1	1	1	1	1	1	1	1	1	1	1	1
1	39	1	0	3030	7	2	OK	0	0	0	0	0	0	0		no	1-1	15	1	1	1	1	1	1	1	1	1	1	1	1	1	1	1	15	1	1	1	1	1	1	1	1	1	1	1	1	1	1	1
0	39	1	0	3850	10	2	OK	0	0	0	0	0	0	0		no	1-1	15	1	1	1	1	1	1	1	1	1	1	1	1	1	1	1	15	1	1	1	1	1	1	1	1	1	1	1	1	1	1	1
0	39	1	0	2800	7	2	OK	0	0	0	0	0	0	0		no	1-1	15	1	1	1	1	1	1	1	1	1	1	1	1	1	1	1	15	1	1	1	1	1	1	1	1	1	1	1	1	1	1	1
1	39	1	0	2680	10	2	OK	0	0	0	0	0	0	0		no	1-1	15	1	1	1	1	1	1	1	1	1	1	1	1	1	1	1	15	1	1	1	1	1	1	1	1	1	1	1	1	1	1	1
0	39	1	0	4480	10	2	OK	0	0	0	0	0	0	0		no	1-1	15	1	1	1	1	1	1	1	1	1	1	1	1	1	1	1	15	1	1	1	1	1	1	1	1	1	1	1	1	1	1	1
0	39	1	0	4480	10	2	OK	0	0	0	0	0	0	0		no	1-1	15	1	1	1	1	1	1	1	1	1	1	1	1	1	1	1	15	1	1	1	1	1	1	1	1	1	1	1	1	1	1	1
0	39	1	0	2770	10	2	OK	0	0	0	0	0	0	0		no	1-1	15	1	1	1	1	1	1	1	1	1	1	1	1	1	1	1	15	1	1	1	1	1	1	1	1	1	1	1	1	1	1	1
1	39	1	0	2840	10	2	OK	0	0	0	0	0	0	0		no	1-1	15	1	1	1	1	1	1	1	1	1	1	1	1	1	1	1	15	1	1	1	1	1	1	1	1	1	1	1	1	1	1	1
0	39	1	0	3960	10	2	OK	0	0	0	0	0	0	0		no	1-1	15	1	1	1	1	1	1	1	1	1	1	1	1	1	1	1	15	1	1	1	1	1	1	1	1	1	1	1	1	1	1	1
1	39	1	0	2670	10	2	OK	0	0	0	0	0	0	0		no	1-1	15	1	1	1	1	1	1	1	1	1	1	1	1	1	1	1	15	1	1	1	1	1	1	1	1	1	1	1	1	1	1	1
1	39	1	0	2980	10	2	OK	0	0	0	0	0	0	0		no	1-1	15	1	1	1	1	1	1	1	1	1	1	1	1	1	1	1	15	1	1	1	1	1	1	1	1	1	1	1	1	1	1	1
1	39	1	0	3330	10	2	OK	0	0	0	0	0	0	0		no	1-1	15	1	1	1	1	1	1	1	1	1	1	1	1	1	1	1	15	1	1	1	1	1	1	1	1	1	1	1	1	1	1	1
1	39	1	0	3320	10	2	OK	0	0	0	0	0	0	0		no	1-1	15	1	1	1	1	1	1	1	1	1	1	1	1	1	1	1	15	1	1	1	1	1	1	1	1	1	1	1	1	1	1	1
1	39	1	0	2970	10	2	OK	0	0	0	0	0	0	0		no	1-1	15	1	1	1	1	1	1	1	1	1	1	1	1	1	1	1	15	1	1	1	1	1	1	1	1	1	1	1	1	1	1	1
1	39	1	0	3350	9	2	OK	0	0	0	0	0	0	0		no	1-1	15	1	1	1	1	1	1	1	1	1	1	1	1	1	1	1	15	1	1	1	1	1	1	1	1	1	1	1	1	1	1	1
1	39	1	0	3840	10	2	OK	0	0	0	0	0	0	0		no	1-1	15	1	1	1	1	1	1	1	1	1	1	1	1	1	1	1	15	1	1	1	1	1	1	1	1	1	1	1	1	1	1	1
0	39	1	0	3770	10	2	OK	0	0	0	0	0	0	0		no	1-1	15	1	1	1	1	1	1	1	1	1	1	1	1	1	1	1	15	1	1	1	1	1	1	1	1	1	1	1	1	1	1	1
0	39	1	0	3850	10	2	OK	0	0	0	0	0	0	0		no	1-1	15	1	1	1	1	1	1	1	1	1	1	1	1	1	1	1	15	1	1	1	1	1	1	1	1	1	1	1	1	1	1	1
0	39	1	0	3160	10	2	OK	0	0	0	0	0	0	0		no	1-1	15	1	1	1	1	1	1	1	1	1	1	1	1	1	1	1	15	1	1	1	1	1	1	1	1	1	1	1	1	1	1	1
0	39	1	0	3570	10	2	OK	0	0	0	0	0	0	0		no	1-1	15	1	1	1	1	1	1	1	1	1	1	1	1	1	1	1	15	1	1	1	1	1	1	1	1	1	1	1	1	1	1	1
0	39	1	0	3850	10	2	OK	0	0	0	0	0	0	0		no	1-1	15	1	1	1	1	1	1	1	1	1	1	1	1	1	1	1	15	1	1	1	1	1	1	1	1	1	1	1	1	1	1	1
0	39	1	0	3800	10	2	OK	0	0	0	0	0	0	0		no	1-1	15	1	1	1	1	1	1	1	1	1	1	1	1	1	1	1	15	1	1	1	1	1	1	1	1	1	1	1	1	1	1	1
1	40	1	0	3060	10	2	OK	0	0	0	0	0	0	0		no	0-1	9	0	0	0	1	1	1	1	0	0	0	1	1	1	1	1	15	1	1	1	1	1	1	1	1	1	1	1	1	1	1	1
1	40	1	0	3970	10	2	OK	0	0	0	0	0	0	0		no	0-0	2	0	0	0	0	0	0	0	0	0	0	0	0	0	1	1	6	0	0	0	0	1	1	1	1	1	1	0	0	0	0	0
0	40	1	0	3910	10	2	OK	0	0	0	0	0	0	0		no	0-0	4	0	0	0	0	0	0	0	0	0	0	0	1	1	1	1	6	0	0	1	1	0	0	0	0	0	0	0	1	1	1	1
1	40	1	0	3970	10	2	OK	0	0	0	0	0	0	0		no	0-0	2	0	0	0	0	0	0	0	0	0	0	0	0	0	1	1	6	0	0	0	0	1	1	1	1	1	1	0	0	0	0	0
1	40	1	0	3380	10	2	OK	0	0	0	0	0	0	0		no	0-0	0	0	0	0	0	0	0	0	0	0	0	0	0	0	0	0	0	0	0	0	0	0	0	0	0	0	0	0	0	0	0	0
1	40	1	0	3730	10	2	OK	0	0	0	0	0	0	0		no	0-0	0	0	0	0	0	0	0	0	0	0	0	0	0	0	0	0	4	0	0	0	0	1	1	0	0	1	1	0	0	0	0	0
1	40	1	0	3790	10	2	OK	0	0	0	0	0	0	0		no	0-0	0	0	0	0	0	0	0	0	0	0	0	0	0	0	0	0	0	0	0	0	0	0	0	0	0	0	0	0	0	0	0	0
0	40	1	0	3430	10	2	OK	0	0	0	0	0	0	0		no	0-0	4	0	0	0	1	1	1	1	0	0	0	0	0	0	0	0	8	0	0	1	1	1	1	1	1	1	1	0	0	0	0	0
0	40	1	0	3490	10	2	OK	0	0	0	0	0	0	0		no	0-0	7	1	0	0	0	0	1	1	0	0	0	0	1	1	1	1	9	0	0	0	0	0	0	1	1	1	1	1	1	1	1	1
1	40	1	0	3580	10	2	OK	0	0	0	0	0	0	0		no	0-1	2	0	0	0	0	0	0	0	0	0	0	0	0	0	1	1	15	1	1	1	1	1	1	1	1	1	1	1	1	1	1	1
0	40	1	0	3300	10	2	OK	0	0	0	0	0	0	0		no	0-1	9	1	0	0	0	0	1	1	1	0	0	1	1	1	1	1	9	1	1	0	0	0	0	1	1	0	0	1	1	1	1	1
1	40	1	0	3720	10	2	OK	0	0	0	0	0	0	0		no	1-1	15	1	1	1	1	1	1	1	1	1	1	1	1	1	1	1	15	1	1	1	1	1	1	1	1	1	1	1	1	1	1	1
1	40	1	0	4120	9	2	OK	0	0	0	0	0	0	0		no	0-0	9	0	0	0	1	1	1	1	0	0	0	1	1	1	1	1	7	1	0	0	0	1	1	1	1	1	1	1	1	1	1	1
1	40	1	0	3990	10	2	OK	0	0	0	0	0	0	0		no	1-1	15	1	1	1	1	1	1	1	1	1	1	1	1	1	1	1	15	1	1	1	1	1	1	1	1	1	1	1	1	1	1	1
0	40	1	0	3860	9	2	OK	0	0	0	0	0	0	0		no	1-1	15	1	1	1	1	1	1	1	1	1	1	1	1	1	1	1	15	1	1	1	1	1	1	1	1	1	1	1	1	1	1	1
0	40	1	0	3020	10	2	OK	0	0	0	0	0	0	0		no	1-1	15	1	1	1	1	1	1	1	1	1	1	1	1	1	1	1	15	1	1	1	1	1	1	1	1	1	1	1	1	1	1	1
0	40	1	0	3690	10	2	OK	0	0	0	0	0	0	0		no	1-1	15	1	1	1	1	1	1	1	1	1	1	1	1	1	1	1	15	1	1	1	1	1	1	1	1	1	1	1	1	1	1	1
1	40	1	0	3060	10	2	OK	0	0	0	0	0	0	0		no	0-0	13	0	1	1	1	1	1	1	0	1	1	1	1	1	1	1	13	0	0	1	1	1	1	1	1	1	1	1	1	1	1	1
1	40	1	0	3300	10	2	OK	0	0	0	0	0	0	0		no	0-0	13	1	1	1	1	1	1	1	0	1	1	0	1	1	1	1	12	1	0	1	1	1	1	1	1	1	1	0	1	0	1	1
1	40	1	0	3750	10	2	OK	0	0	0	0	0	0	0		no	1-1	15	1	1	1	1	1	1	1	1	1	1	1	1	1	1	1	15	1	1	1	1	1	1	1	1	1	1	1	1	1	1	1
1	40	1	0	3510	10	2	OK	0	0	0	0	0	0	0		no	0-0	0	0	0	0	0	0	0	0	0	0	0	0	0	0	0	0	0	0	0	0	0	0	0	0	0	0	0	0	0	0	0	0
1	40	1	0	2350	9	2	OK	0	0	0	0	0	0	0		no	0-1	11	1	0	0	1	1	1	1	1	0	0	1	1	1	1	1	15	1	1	1	1	1	1	1	1	1	1	1	1	1	1	1
1	40	1	0	2880	10	2	OK	0	0	0	0	0	0	0		no	1-1	15	1	1	1	1	1	1	1	1	1	1	1	1	1	1	1	15	1	1	1	1	1	1	1	1	1	1	1	1	1	1	1
0	40	1	0	4640	10	2	OK	0	0	0	0	0	0	0		no	1-1	15	1	1	1	1	1	1	1	1	1	1	1	1	1	1	1	15	1	1	1	1	1	1	1	1	1	1	1	1	1	1	1
0	40	1	0	3430	9	2	OK	0	0	0	0	0	0	0		no	1-1	15	1	1	1	1	1	1	1	1	1	1	1	1	1	1	1	15	1	1	1	1	1	1	1	1	1	1	1	1	1	1	1
0	40	1	0	4020	10	2	OK	0	0	0	0	0	0	0		no	1-0	15	1	1	1	1	1	1	1	1	1	1	1	1	1	1	1	13	0	0	1	1	1	1	1	1	1	1	1	1	1	1	1
0	40	1	0	3950	10	2	OK	0	0	0	0	0	0	0		no	1-1	15	1	1	1	1	1	1	1	1	1	1	1	1	1	1	1	15	1	1	1	1	1	1	1	1	1	1	1	1	1	1	1
0	40	1	0	3250	9	2	OK	0	0	0	0	0	0	0		no	0-0	8	0	0	0	1	1	1	1	0	0	0	0	1	1	1	1	12	0	0	1	1	1	1	1	1	1	1	0	1	1	1	1
1	40	1	0	3920	10	2	OK	0	0	0	0	0	0	0		no	0-1	9	0	0	0	1	1	1	1	0	0	0	1	1	1	1	1	15	1	1	1	1	1	1	1	1	1	1	1	1	1	1	1
0	40	1	0	2870	10	2	OK	0	0	0	0	0	0	0		no	0-0	10	0	0	1	1	1	1	1	0	0	1	0	1	1	1	1	11	0	0	1	0	1	1	1	1	1	1	0	1	1	1	1
0	40	1	0	3960	10	2	OK	0	0	0	0	0	0	0		no	0-0	11	0	0	1	1	1	1	1	0	0	1	1	1	1	1	1	13	0	0	1	1	1	1	1	1	1	1	1	1	1	1	1
0	40	1	0	3560	10	2	OK	0	0	0	0	0	0	0		no	1-1	15	1	1	1	1	1	1	1	1	1	1	1	1	1	1	1	15	1	1	1	1	1	1	1	1	1	1	1	1	1	1	1
0	40	1	0	3270	10	2	OK	0	0	0	0	0	0	0		no	0-0	11	0	1	1	1	1	1	1	0	1	0	0	1	1	1	1	11	0	0	1	0	1	1	1	1	1	1	0	1	1	1	1
1	40	1	0	3470	10	2	OK	0	0	0	0	0	0	0		no	1-1	15	1	1	1	1	1	1	1	1	1	1	1	1	1	1	1	15	1	1	1	1	1	1	1	1	1	1	1	1	1	1	1
0	40	1	0	4070	8	2	OK	0	0	0	0	0	0	0		no	0-1	10	1	0	0	1	1	1	1	0	0	0	1	1	1	1	1	14	1	0	1	1	1	1	1	1	1	1	1	1	1	1	1
1	40	1	0	3300	10	2	OK	0	0	0	0	0	0	0		no	0-0	13	1	1	1	1	1	1	1	0	1	1	0	1	1	1	1	12	1	0	1	1	1	1	1	1	1	1	0	1	0	1	1
0	40	1	0	3020	10	2	OK	0	0	0	0	0	0	0		no	1-1	15	1	1	1	1	1	1	1	1	1	1	1	1	1	1	1	15	1	1	1	1	1	1	1	1	1	1	1	1	1	1	1
0	40	1	0	2350	10	2	OK	0	0	0	0	0	0	0		no	0-1	9	0	0	0	1	1	1	1	0	0	0	1	1	1	1	1	11	0	0	1	1	1	1	1	1	1	1	1	1	1	0	0
0	40	1	0	3860	9	2	OK	0	0	0	0	0	0	0		no	1-1	15	1	1	1	1	1	1	1	1	1	1	1	1	1	1	1	15	1	1	1	1	1	1	1	1	1	1	1	1	1	1	1
0	40	1	0	3400	10	2	OK	0	0	0	0	0	0	0		no	1-1	15	1	1	1	1	1	1	1	1	1	1	1	1	1	1	1	15	1	1	1	1	1	1	1	1	1	1	1	1	1	1	1
1	40	1	0	3180	10	2	OK	0	0	0	0	0	0	0		no	1-1	8	0	0	1	0	0	1	1	0	0	1	0	1	1	1	1	14	1	0	1	1	1	1	1	1	1	1	1	1	1	1	1
0	40	1	0	3340	10	2	OK	0	0	0	0	0	0	0		no	1-1	9	0	0	1	1	1	1	0	0	0	1	1	1	1	1	1	15	1	1	1	1	1	1	1	1	1	1	1	1	1	1	1
1	40	1	0	3010	10	2	OK	0	0	0	0	0	0	0		no	0-1	9	0	0	0	1	1	1	1	0	0	0	1	1	1	1	1	13	0	0	1	1	1	1	1	1	1	1	1	1	1	1	1
1	40	1	0	3350	10	2	OK	0	0	0	0	0	0	0		no	1-1	14	1	1	1	1	1	1	1	0	1	1	1	1	1	1	1	13	0	0	1	1	1	1	1	1	1	1	1	1	1	1	1
0	40	1	0	3170	10	2	OK	0	0	0	0	0	0	0		no	1-1	15	1	1	1	1	1	1	1	1	1	1	1	1	1	1	1	15	1	1	1	1	1	1	1	1	1	1	1	1	1	1	1
1	40	1	0	3750	10	2	OK	0	0	0	0	0	0	0		no	1-1	15	1	1	1	1	1	1	1	1	1	1	1	1	1	1	1	15	1	1	1	1	1	1	1	1	1	1	1	1	1	1	1
0	40	1	0	3700	10	2	OK	0	0	0	0	0	0	0		no	0-1	9	0	0	0	1	1	1	1	0	0	0	0	0	0	1	1	15	1	1	1	1	1	1	1	1	1	1	1	1	1	1	1
1	40	1	0	3170	9	2	OK	0	0	0	0	0	0	0		no	1-1	15	1	1	1	1	1	1	1	1	1	1	1	1	1	1	1	15	1	1	1	1	1	1	1	1	1	1	1	1	1	1	1
0	40	1	0	3410	10	2	OK	0	0	0	0	0	0	0		no	1-1	15	1	1	1	1	1	1	1	1	1	1	1	1	1	1	1	15	1	1	1	1	1	1	1	1	1	1	1	1	1	1	1
0	40	1	0	3870	8	2	OK	0	0	0	0	0	0	0		no	0-1	11	1	0	0	0	0	1	1	1	1	1	1	1	1	1	1	15	1	1	1	1	1	1	1	1	1	1	1	1	1	1	1
1	40	1	0	3640	10	2	OK	0	0	0	0	0	0	0		no	0-0	8	1	0	0	0	0	1	1	0	0	0	1	1	1	1	1	12	1	0	0	0	1	1	1	1	1	1	1	1	1	1	1
0	40	1	0	3110	8	2	OK	0	0	0	0	0	0	0		no	1-1	15	1	1	1	1	1	1	1	1	1	1	1	1	1	1	1	15	1	1	1	1	1	1	1	1	1	1	1	1	1	1	1
0	40	1	0	4000	10	2	OK	0	0	0	0	0	0	0		no	1-1	15	1	1	1	1	1	1	1	1	1	1	1	1	1	1	1	15	1	1	1	1	1	1	1	1	1	1	1	1	1	1	1
0	40	1	0	4210	10	2	OK	0	0	0	0	0	0	0		no	1-1	15	1	1	1	1	1	1	1	1	1	1	1	1	1	1	1	15	1	1	1	1	1	1	1	1	1	1	1	1	1	1	1
1	40	1	0	3720	10	2	OK	0	0	0	0	0	0	0		no	1-1	15	1	1	1	1	1	1	1	1	1	1	1	1	1	1	1	15	1	1	1	1	1	1	1	1	1	1	1	1	1	1	1
0	40	1	0	3300	9	2	OK	0	0	0	0	0	0	0		no	1-1	15	1	1	1	1	1	1	1	1	1	1	1	1	1	1	1	15	1	1	1	1	1	1	1	1	1	1	1	1	1	1	1
1	40	1	0	3540	10	2	OK	0	0	0	0	0	0	0		no	1-1	15	1	1	1	1	1	1	1	1	1	1	1	1	1	1	1	15	1	1	1	1	1	1	1	1	1	1	1	1	1	1	1
1	40	1	0	3900	10	2	OK	0	0	0	0	0	0	0		no	1-1	15	1	1	1	1	1	1	1	1	1	1	1	1	1	1	1	15	1	1	1	1	1	1	1	1	1	1	1	1	1	1	1
1	40	1	0	3500	10	2	OK	0	0	0	0	0	0	0		no	1-1	15	1	1	1	1	1	1	1	1	1	1	1	1	1	1	1	15	1	1	1	1	1	1	1	1	1	1	1	1	1	1	1
0	40	1	0	3580	10	2	OK	0	0	0	0	0	0	0		no	1-1	15	1	1	1	1	1	1	1	1	1	1	1	1	1	1	1	15	1	1	1	1	1	1	1	1	1	1	1	1	1	1	1
1	40	1	0	3900	10	2	OK	0	0	0	0	0	0	0		no	1-1	15	1	1	1	1	1	1	1	1	1	1	1	1	1	1	1	15	1	1	1	1	1	1	1	1	1	1	1	1	1	1	1
1	40	1	0	4730	10	2	OK	0	0	0	0	0	0	0		no	1-1	15	1	1	1	1	1	1	1	1	1	1	1	1	1	1	1	15	1	1	1	1	1	1	1	1	1	1	1	1	1	1	1
0	40	1	0	4150	10	2	OK	0	0	0	0	0	0	0		no	1-1	15	1	1	1	1	1	1	1	1	1	1	1	1	1	1	1	15	1	1	1	1	1	1	1	1	1	1	1	1	1	1	1
0	40	1	0	3400	10	2	OK	0	0	0	0	0	0	0		no	1-1	15	1	1	1	1	1	1	1	1	1	1	1	1	1	1	1	15	1	1	1	1	1	1	1	1	1	1	1	1	1	1	1
0	40	1	0	4200	10	2	OK	0	0	0	0	0	0	0		no	1-1	15	1	1	1	1	1	1	1	1	1	1	1	1	1	1	1	15	1	1	1	1	1	1	1	1	1	1	1	1	1	1	1
1	40	1	0	3300	10	2	OK	0	0	0	0	0	0	0		no	1-1	15	1	1	1	1	1	1	1	1	1	1	1	1	1	1	1	15	1	1	1	1	1	1	1	1	1	1	1	1	1	1	1
1	40	1	0	3240	10	2	OK	0	0	0	0	0	0	0		no	1-1	15	1	1	1	1	1	1	1	1	1	1	1	1	1	1	1	15	1	1	1	1	1	1	1	1	1	1	1	1	1	1	1
0	40	1	0	4350	10	2	OK	0	0	0	0	0	0	0		no	1-1	15	1	1	1	1	1	1	1	1	1	1	1	1	1	1	1	15	1	1	1	1	1	1	1	1	1	1	1	1	1	1	1
0	40	1	0	3820	9	2	OK	0	0	0	0	0	0	0		no	1-1	15	1	1	1	1	1	1	1	1	1	1	1	1	1	1	1	15	1	1	1	1	1	1	1	1	1	1	1	1	1	1	1
1	40	1	0	3390	10	2	OK	0	0	0	0	0	0	0		no	1-1	15	1	1	1	1	1	1	1	1	1	1	1	1	1	1	1	15	1	1	1	1	1	1	1	1	1	1	1	1	1	1	1
0	40	1	0	3530	10	2	OK	0	0	0	0	0	0	0		no	1-1	15	1	1	1	1	1	1	1	1	1	1	1	1	1	1	1	15	1	1	1	1	1	1	1	1	1	1	1	1	1	1	1
0	40	1	0	4020	10	2	OK	0	0	0	0	0	0	0		no	1-1	15	1	1	1	1	1	1	1	1	1	1	1	1	1	1	1	15	1	1	1	1	1	1	1	1	1	1	1	1	1	1	1
0	40	1	0	3950	10	2	OK	0	0	0	0	0	0	0		no	1-1	15	1	1	1	1	1	1	1	1	1	1	1	1	1	1	1	15	1	1	1	1	1	1	1	1	1	1	1	1	1	1	1
0	40	1	0	3430	9	2	OK	0	0	0	0	0	0	0		no	1-1	15	1	1	1	1	1	1	1	1	1	1	1	1	1	1	1	15	1	1	1	1	1	1	1	1	1	1	1	1	1	1	1
0	40	1	0	4640	10	2	OK	0	0	0	0	0	0	0		no	1-1	15	1	1	1	1	1	1	1	1	1	1	1	1	1	1	1	15	1	1	1	1	1	1	1	1	1	1	1	1	1	1	1
1	40	1	0	2880	10	2	OK	0	0	0	0	0	0	0		no	1-1	15	1	1	1	1	1	1	1	1	1	1	1	1	1	1	1	15	1	1	1	1	1	1	1	1	1	1	1	1	1	1	1
1	40	1	0	3210	10	2	OK	0	0	0	0	0	0	0		no	0-0	6	0	0	0	1	1	1	1	0	0	0	0	0	0	1	1	6	0	0	0	0	1	1	1	1	1	1	0	0	0	0	0
0	40	1	0	3400	10		1	1	0	0	0	0	0	1		no	0-0	6	0	0	0	1	1	1	1	0	0	0	0	0	0	1	1	7	1	0	0	0	1	1	1	1	1	1	0	0	0	0	0
0	41	1	0	3430	10	2	OK	0	0	0	0	0	0	0		no	0-0	0	0	0	0	0	0	0	0	0	0	0	0	0	0	0	0	0	0	0	0	0	0	0	0	0	0	0	0	0	0	0	0
0	41	1	0	3400	10	2	OK	0	0	0	0	0	0	0		no	0-1	0	0	0	0	0	0	0	0	0	0	0	0	0	0	0	0	0	0	0	0	0	0	0	0	0	0	0	0	0	0	0	0
0	41	1	0	4640	10	2	OK	0	0	0	0	0	0	0		no	1-1	15	1	1	1	1	1	1	1	1	1	1	1	1	1	1	1	15	1	1	1	1	1	1	1	1	1	1	1	1	1	1	1
1	41	1	0	3560	10	2	OK	0	0	0	0	0	0	0		no	0-0	11	1	1	0	1	1	1	1	0	1	0	0	1	1	1	1	13	1	0	1	1	1	1	1	1	1	1	0	1	1	1	1
1	41	1	0	4140	10	2	OK	0	0	0	0	0	0	0		no	0-0	3	0	0	0	1	1	0	0	0	0	0	0	0	0	0	1	6	0	0	0	0	1	1	1	1	1	1	0	0	0	0	0
0	41	1	0	3170	10	2	OK	0	0	0	0	0	0	0		no	1-0	15	1	1	1	1	1	1	1	1	1	1	1	1	1	1	1	0	0	0	0	0	0	0	0	0	0	0	0	0	0	0	0
0	41	1	0	3610	8	2	OK	0	0	0	0	0	0	0		no	0-0	10	0	0	1	1	1	1	1	0	0	0	1	1	1	1	1	6	0	0	0	0	1	1	0	0	0	0	0	1	1	1	1
0	41	1	0	3670	9	2	OK	0	0	0	0	0	0	0		no	0-0	0	0	0	0	0	0	0	0	0	0	0	0	0	0	0	0	0	0	0	0	0	0	0	0	0	0	0	0	0	0	0	0
0	41	1	0	3870	10	2	OK	0	0	0	0	0	0	0		no	0-1	9	1	0	0	1	1	1	1	0	0	0	0	1	1	1	1	15	1	1	1	1	1	1	1	1	1	1	1	1	1	1	1
1	41	1	0	3050	10	2	OK	0	0	0	0	0	0	0		no	0-0	7	0	0	0	0	0	1	1	0	0	0	1	1	1	1	1	13	0	0	1	1	1	1	1	1	1	1	1	1	1	1	1
0	41	1	0	2930	10	2	OK	0	0	0	0	0	0	0		no	1-1	15	1	1	1	1	1	1	1	1	1	1	1	1	1	1	1	15	1	1	1	1	1	1	1	1	1	1	1	1	1	1	1
1	41	1	0	3870	10	2	OK	0	0	0	0	0	0	0		no	0-0	0	0	0	0	0	0	0	0	0	0	0	0	0	0	0	0	0	0	0	0	0	0	0	0	0	0	0	0	0	0	0	0
0	41	1	0	3970	10	2	OK	0	0	0	0	0	0	0		no	0-0	4	0	0	0	1	1	0	0	0	0	0	0	0	0	1	1	2	0	0	0	0	0	0	0	0	1	1	0	0	0	0	0
0	41	1	0	3610	8	2	OK	0	0	0	0	0	0	0		no	0-0	10	0	0	1	1	1	1	1	0	0	0	1	1	1	1	1	6	0	0	0	0	1	1	0	0	0	0	0	1	1	1	1
0	41	1	0	3800	10	2	OK	0	0	0	0	0	0	0		no	0-1	14	1	1	1	1	1	1	1	0	1	1	1	1	1	1	1	15	1	1	1	1	1	1	1	1	1	1	1	1	1	1	1
0	41	1	0	4360	10	2	OK	0	0	0	0	0	0	0		no	1-1	15	1	1	1	1	1	1	1	1	1	1	1	1	1	1	1	15	1	1	1	1	1	1	1	1	1	1	1	1	1	1	1
1	41	1	0	3600	10	2	OK	0	0	0	0	0	0	0		no	1-1	15	1	1	1	1	1	1	1	1	1	1	1	1	1	1	1	15	1	1	1	1	1	1	1	1	1	1	1	1	1	1	1
0	41	1	0	3610	10	2	OK	0	0	0	0	0	0	0		no	0-1	11	1	0	1	1	1	1	1	0	0	1	0	1	1	1	1	11	0	0	0	1	1	1	1	1	1	1	0	1	1	1	1
1	41	1	0	3270	10	2	OK	0	0	0	0	0	0	0		no	1-1	15	1	1	1	1	1	1	1	1	1	1	1	1	1	1	1	15	1	1	1	1	1	1	1	1	1	1	1	1	1	1	1
1	41	1	0	3880	10	2	OK	0	0	0	0	0	0	0		no	0-0	11	1	0	0	1	1	1	1	1	0	0	1	1	1	1	1	13	1	1	0	0	1	1	1	1	1	1	1	1	1	1	1
0	41	1	0	3800	10	2	OK	0	0	0	0	0	0	0		no	0-1	14	1	1	1	1	1	1	1	0	1	1	1	1	1	1	1	15	1	1	1	1	1	1	1	1	1	1	1	1	1	1	1
0	41	1	0	4640	10	2	OK	0	0	0	0	0	0	0		no	1-1	15	1	1	1	1	1	1	1	1	1	1	1	1	1	1	1	15	1	1	1	1	1	1	1	1	1	1	1	1	1	1	1
1	41	1	0	3600	10	2	OK	0	0	0	0	0	0	0		no	1-1	15	1	1	1	1	1	1	1	1	1	1	1	1	1	1	1	15	1	1	1	1	1	1	1	1	1	1	1	1	1	1	1
1	41	1	0	3400	10	2	OK	0	0	0	0	0	0	0		no	1-1	8	0	0	0	0	0	1	1	1	0	0	1	1	1	1	1	14	0	1	1	1	1	1	1	1	1	1	1	1	1	1	1
0	41	1	0	4360	10	2	OK	0	0	0	0	0	0	0		no	1-1	15	1	1	1	1	1	1	1	1	1	1	1	1	1	1	1	15	1	1	1	1	1	1	1	1	1	1	1	1	1	1	1
1	41	1	0	3590	10	2	OK	0	0	0	0	0	0	0		no	1-1	15	1	1	1	1	1	1	1	1	1	1	1	1	1	1	1	15	1	1	1	1	1	1	1	1	1	1	1	1	1	1	1
0	41	1	0	4100	10	2	OK	0	0	0	0	0	0	0		no	1-1	15	1	1	1	1	1	1	1	1	1	1	1	1	1	1	1	15	1	1	1	1	1	1	1	1	1	1	1	1	1	1	1
1	41	1	0	3520	10	2	OK	0	0	0	0	0	0	0		no	1-1	15	1	1	1	1	1	1	1	1	1	1	1	1	1	1	1	15	1	1	1	1	1	1	1	1	1	1	1	1	1	1	1
0	41	1	0	3980	10	2	OK	0	0	0	0	0	0	0		no	1-1	15	1	1	1	1	1	1	1	1	1	1	1	1	1	1	1	15	1	1	1	1	1	1	1	1	1	1	1	1	1	1	1
1	41	1	0	2940	10	2	OK	0	0	0	0	0	0	0		no	1-1	15	1	1	1	1	1	1	1	1	1	1	1	1	1	1	1	15	1	1	1	1	1	1	1	1	1	1	1	1	1	1	1
1	41	1	0	3840	10	2	OK	0	0	0	0	0	0	0		no	1-1	15	1	1	1	1	1	1	1	1	1	1	1	1	1	1	1	15	1	1	1	1	1	1	1	1	1	1	1	1	1	1	1
1	41	1	0	2940	10	2	OK	0	0	0	0	0	0	0		no	1-1	15	1	1	1	1	1	1	1	1	1	1	1	1	1	1	1	15	1	1	1	1	1	1	1	1	1	1	1	1	1	1	1
1	41	1	0	3320	10	2	OK	0	0	0	0	0	0	0		no	1-1	15	1	1	1	1	1	1	1	1	1	1	1	1	1	1	1	15	1	1	1	1	1	1	1	1	1	1	1	1	1	1	1
1	41	1	0	3440	10	2	OK	0	0	0	0	0	0	0		no	1-1	15	1	1	1	1	1	1	1	1	1	1	1	1	1	1	1	15	1	1	1	1	1	1	1	1	1	1	1	1	1	1	1
0	41	1	0	4440	10	2	OK	0	0	0	0	0	0	0		no	1-1	15	1	1	1	1	1	1	1	1	1	1	1	1	1	1	1	15	1	1	1	1	1	1	1	1	1	1	1	1	1	1	1
1	41	1	0	3410	10	2	OK	0	0	0	0	0	0	0		no	1-1	15	1	1	1	1	1	1	1	1	1	1	1	1	1	1	1	15	1	1	1	1	1	1	1	1	1	1	1	1	1	1	1
1	41	1	0	3270	10	2	OK	0	0	0	0	0	0	0		no	1-1	15	1	1	1	1	1	1	1	1	1	1	1	1	1	1	1	15	1	1	1	1	1	1	1	1	1	1	1	1	1	1	1
0	42	1	0	4220	9	2	OK	0	0	0	0	0	0	0		no	0-0	2	0	0	0	0	0	0	0	0	0	0	0	0	0	1	1	5	0	0	0	0	1	1	0	1	1	1	0	0	0	0	0
1	42	1	0	3860	10	2	OK	0	0	0	0	0	0	0		no	0-0	0	0	0	0	0	0	0	0	0	0	0	0	0	0	0	0	0	0	0	0	0	0	0	0	0	0	0	0	0	0	0	0
1	42	1	0	3480	10	2	OK	0	0	0	0	0	0	0		no	0-0	6	0	0	0	1	1	1	1	0	0	0	0	0	0	1	1	8	0	0	0	0	1	1	1	1	1	1	0	1	1	0	0
1	42	1	0	2770	10	2	OK	0	0	0	0	0	0	0		no	0-0	4	0	0	0	0	0	0	0	0	0	0	0	1	1	1	1	8	0	0	0	0	1	1	0	1	1	0	1	1	1	1	1
1	42	1	0	3260	10	2	OK	0	0	0	0	0	0	0		no	0-0	6	0	0	0	0	0	1	1	0	0	0	0	1	1	1	1	8	0	0	1	1	1	1	1	1	1	1	0	0	0	0	0
0	42	1	0	3200	10	2	OK	0	0	0	0	0	0	0		no	0-0	0	0	0	0	0	0	0	0	0	0	0	0	0	0	0	0	0	0	0	0	0	0	0	0	0	0	0	0	0	0	0	0
1	42	1	0	3480	10	2	OK	0	0	0	0	0	0	0		no	1-1	15	1	1	1	1	1	1	1	1	1	1	1	1	1	1	1	15	1	1	1	1	1	1	1	1	1	1	1	1	1	1	1
1	42	1	0	3480	10	2	OK	0	0	0	0	0	0	0		no	1-1	15	1	1	1	1	1	1	1	1	1	1	1	1	1	1	1	15	1	1	1	1	1	1	1	1	1	1	1	1	1	1	1
1	42	1	0	3760	10	2	OK	0	0	0	0	0	0	0		no	1-1	15	1	1	1	1	1	1	1	1	1	1	1	1	1	1	1	15	1	1	1	1	1	1	1	1	1	1	1	1	1	1	1
0	42	1	0	3970	7	2	OK	0	0	0	0	0	0	0		no	1-1	15	1	1	1	1	1	1	1	1	1	1	1	1	1	1	1	15	1	1	1	1	1	1	1	1	1	1	1	1	1	1	1
1	42	1	0	3480	10	2	OK	0	0	0	0	0	0	0		no	1-1	15	1	1	1	1	1	1	1	1	1	1	1	1	1	1	1	15	1	1	1	1	1	1	1	1	1	1	1	1	1	1	1
[truncated: 4 more columns]
