# Supplementary material for: Impact of selected risk factors on motor performance in the third month of life and motor development in the ninth month
Source: PeerJ. 2023 Jun 13;11:e15460. doi: 10.7717/peerj.15460 (PMC10274587; doi:10.7717/peerj.15460)
Supplement: Supplemental Information 2 [file peerj-11-15460-s002.xlsx]

## Sheet: przekodowane
chł o/ dz1	tydzień ciąży	wcześniak/donoszony	wcześniak=1/donoszony=0	waga	APGAR 5	kat apgar 5	obniżona kat APGAR5	obnAPGAR5=1	IVH	stopień IVH	ZZO	hipotrofia	Hiperbilirubinemia	suma+wcz+APGAR	jakie-cz-ryzyka	czynn-ryzyka	ilość-pron-sup	jakość pronacja-3mc	głowa izolowany obrót	P ramie z przodu	L ramię z przodu	P dłoń otwarta	L dłoń otwarta	P kciuk otwarty	L kciuk otwarty	kregosłup wyprostowany	P łopatka przyśrodkowo	L łopatka przysrodkowo	miednica pośrednio ustawiona	P KD luźno ułożona	L KD luźno ułożona	P stopa w pozycji posredniej	L stopa w pozycji posredniej	jakość supinacja-3mc	głowa w symetrii	kregosłup wyprostowany	P bark równowaga rotacji	L bark równowaga rotacji	P nadgarstek poz posrednia	L nadgarstek poz posrednia	P kciuk na zewnątrz	L kciuk na zewnątrz	P dłon posrednio	L dłon pośrednio	miednica wyprost	P KD rotacja zewn	L KD rotacja zewn	P zgięcie-biod-kol-skok	L zgiecie-biodr-kol-skok
0	38	1	0	2230	10	2	OK	0	0	0	0	1	0	1	hipo	tak	1-1	15	1	1	1	1	1	1	1	1	1	1	1	1	1	1	1	15	1	1	1	1	1	1	1	1	1	1	1	1	1	1	1
1	38	1	0	2210	10	2	OK	0	0	0	0	1	0	1	hipo	tak	1-1	15	1	1	1	1	1	1	1	1	1	1	1	1	1	1	1	15	1	1	1	1	1	1	1	1	1	1	1	1	1	1	1
1	38	1	0	1970	10	2	OK	0	0	0	0	1	0	1	hipo	tak	1-1	15	1	1	1	1	1	1	1	1	1	1	1	1	1	1	1	15	1	1	1	1	1	1	1	1	1	1	1	1	1	1	1
0	38	1	0	2230	10	2	OK	0	0	0	0	1	0	1	hipo	tak	1-1	15	1	1	1	1	1	1	1	1	1	1	1	1	1	1	1	15	1	1	1	1	1	1	1	1	1	1	1	1	1	1	1
1	38	1	0	2210	10	2	OK	0	0	0	0	1	0	1	hipo	tak	1-1	15	1	1	1	1	1	1	1	1	1	1	1	1	1	1	1	15	1	1	1	1	1	1	1	1	1	1	1	1	1	1	1
1	39	1	0	2430	10	2	OK	0	0	0	0	1	0	1	hipo	tak	0-0	0	0	0	0	0	0	0	0	0	0	0	0	0	0	0	0	0	0	0	0	0	0	0	0	0	0	0	0	0	0	0	0
1	39	1	0	2590	10	2	OK	0	0	0	0	1	0	1	hipo	tak	1-1	15	1	1	1	1	1	1	1	1	1	1	1	1	1	1	1	15	1	1	1	1	1	1	1	1	1	1	1	1	1	1	1
1	40	1	0	2720	6	1	1	1	0	0	0	1	0	2	hipo+APGAR	tak	1-1	15	1	1	1	1	1	1	1	1	1	1	1	1	1	1	1	15	1	1	1	1	1	1	1	1	1	1	1	1	1	1	1
0	41	1	0	2260	10	2	OK	0	0	0	0	1	0	1	hipo	tak	1-1	15	1	1	1	1	1	1	1	1	1	1	1	1	1	1	1	15	1	1	1	1	1	1	1	1	1	1	1	1	1		1
1	41	1	0	3840	10	2	OK	0	0	0	0	1	0	1	hipo	tak	1-1	15	1	1	1	1	1	1	1	1	1	1	1	1	1	1	1	15	1	1	1	1	1	1	1	1	1	1	1	1	1	1	1
0	38	1	0	2160	10	2	OK	0	0	0	0	0	1	1	hyper	tak	1-1	15	1	1	1	1	1	1	1	1	1	1	1	1	1	1	1	15	1	1	1	1	1	1	1	1	1	1	1	1	1	1	1
0	39	1	0	3350	9	2	OK	0	0	0	0	0	1	1	hyper	tak	0-0	0	0	0	0	0	0	0	0	0	0	0	0	0	0	0	0	0	0	0	0	0	0	0	0	0	0	0	0	0	0	0	0
1	39	1	0	2980	10	2	OK	0	0	0	0	0	1	1	hyper	tak	0-0	6	0	0	0	0	0	1	1	0	0	0	0	1	1	1	1	8	0	0	1	0	1	1	1	1	1	1	0	0	0	0	0
0	39	1	0	2880	10	2	OK	0	0	0	0	0	1	1	hyper	tak	1-1	15	1	1	1	1	1	1	1	1	1	1	1	1	1	1	1	15	1	1	1	1	1	1	1	1	1	1	1	1	1	1	1
0	40	1	0	3880	9	2	OK	0	0	0	0	0	1	1	hyper	tak	0-0	9	1	1	0	1	1	1	1	0	0	0	0	1	0	1	1	10	1	0	0	0	1	1	1	1	1	1	0	1	0	1	1
0	40	1	0	3910	10	2	OK	0	0	0	0	0	1	1	hyper	tak	0-0	6	0	0	0	1	1	1	1	0	0	0	0	0	0	1	1	4	0	0	0	0	0	0	0	0	0	0	0	1	1	1	1
0	41	1	0	3200	10	2	OK	0	0	0	0	0	1	1	hyper	tak	0-0	0	0	0	0	0	0	0	0	0	0	0	0	0	0	0	0	0	0	0	0	0	0	0	0	0	0	0	0	0	0	0	0
1	41	1	0	3070	9	2	OK	0	0	0	0	0	1	1	hyper	tak	1-0	11	1	0	1	1	1	1	1	0	0	1	0	1	1	1	1	8	0	0	0	0	1	1	1	1	1	1	0	1	1	0	0
1	41	1	0	3070	9	2	OK	0	0	0	0	0	1	1	hyper	tak	1-0	11	1	0	1	1	1	1	1	0	0	1	0	1	1	1	1	8	0	0	0	0	1	1	1	1	1	1	0	1	1	0	0
0	41	1	0	2820	10	2	OK	0	0	0	0	0	1	1	hyper	tak	0-0	0	0	0	0	0	0	0	0	0	0	0	0	0	0	0	0	0	0	0	0	0	0	0	0	0	0	0	0	0	0	0	0
0	41	1	0	3540	9	2	OK	0	0	0	0	0	1	1	hyper	tak	1-1	15	1	1	1	1	1	1	1	1	1	1	1	1	1	1	1	15	1	1	1	1	1	1	1	1	1	1	1	1	1	1	1
0	41	1	0	3540	9	2	OK	0	0	0	0	0	1	1	hyper	tak	1-1	15	1	1	1	1	1	1	1	1	1	1	1	1	1	1	1	15	1	1	1	1	1	1	1	1	1	1	1	1	1	1	1
1	42	1	0	3160	10	2	OK	0	0	0	0	0	1	1	hyper	tak	1-1	15	1	1	1	1	1	1	1	1	1	1	1	1	1	1	1	15	1	1	1	1	1	1	1	1	1	1	1	1	1	1	1
1	42	1	0	3160	10	2	OK	0	0	0	0	0	1	1	hyper	tak	1-1	15	1	1	1	1	1	1	1	1	1	1	1	1	1	1	1	15	1	1	1	1	1	1	1	1	1	1	1	1	1	1	1
0	38	1	0	3960	10	2	OK	0	0	0	1	0	0	1	IVH	tak	0-0	10	1	0	1	1	1	1	1	0	0	1	0	0	1	1	1	13	1	0	1	1	1	1	1	1	1	1	0	1	1	1	1
1	39	1	0	4130	10	2	OK	0	1	2	0	0	0	1	IVH	tak	0-1	7	0	0	0	0	0	1	1	0	0	1	1	1	1	1	1	15	1	1	1	1	1	1	1	1	1	1	1	1	1	1	1
0	40	1	0	4490	9	2	OK	0	1	1	0	0	0	1	IVH	tak	0-0	6	0	0	0	1	1	1	1	0	0	0	0	0	0	1	1	8	0	0	0	0	1	0	1	0	1	0	1	1	1	1	1
1	40	1	0	4050	10	2	OK	0	1	1	0	0	0	1	IVH	tak	0-1	11	1	1	0	1	1	1	1	0	0	0	1	1	1	1	1	15	1	1	1	1	1	1	1	1	1	1	1	1	1	1	1
0	40	1	0	3500	10	2	OK	0	1	1	0	0	0	1	IVH	tak	1-1	15	1	1	1	1	1	1	1	1	1	1	1	1	1	1	1	15	1	1	1	1	1	1	1	1	1	1	1	1	1	1	1
0	41	1	0	3540	10	2	OK	0	1	3	0	0	0	1	IVH	tak	1-1	15	1	1	1	1	1	1	1	1	1	1	1	1	1	1	1	15	1	1	1	1	1	1	1	1	1	1	1	1	1	1	1
0	41	1	0	3480	10	2	OK	0	1	1	0	0	0	1	IVH	tak	1-1	15	1	1	1	1	1	1	1	1	1	1	1	1	1	1	1	15	1	1	1	1	1	1	1	1	1	1	1	1	1	1	1
0	41	1	0	3480	10	2	OK	0	1	1	0	0	0	1	IVH	tak	1-1	15	1	1	1	1	1	1	1	1	1	1	1	1	1	1	1	15	1	1	1	1	1	1	1	1	1	1	1	1	1	1	1
0	41	1	0	3160	8	2	OK	0	0	0	1	0	0	1	IVH	tak	0-1	9	0	0	0	1	1	1	1	0	0	0	1	1	1	1	1	15	1	1	1	1	1	1	1	1	1	1	1	1	1	1	1
1	39	1	0	3100	10	2	OK	0	1	3	1	0	0	2	IVH+RDS	tak	0-0	0	0	0	0	0	0	0	0	0	0	0	0	0	0	0	0	0	0	0	0	0	0	0	0	0	0	0	0	0	0	0	0
0	39	1	0	5160	9	2	OK	0	0	0	1	0	1	2	RDS+hyper	tak	1-1	15	1	1	1	1	1	1	1	1	1	1	1	1	1	1	1	15	1	1	1	1	1	1	1	1	1	1	1	1	1	1	1
0	41	1	0	4700	2	0	1	1	0	0	1	0	1	3	RDS+hyper+APGAR	tak	0-0	7	1	0	0	0	1	0	1	0	0	0	0	1	1	1	1	4	1	0	0	0	0	1	0	0	1	1	0	0	0	0	0
1	30	0	1	2900	9	2	OK	0	0	0	0	0	0	1	wcz	tak	1-1	15	1	1	1	1	1	1	1	1	1	1	1	1	1	1	1	15	1	1	1	1	1	1	1	1	1	1	1	1	1	1	1
0	31	0	1	1810	6	1	1	1	0	0	0	0	0	2	wcz+APGAR	tak	0-0	11	1	0	0	1	1	1	1	1	0	0	1	1	1	1	1	13	1	1	0	0	1	1	1	1	1	1	1	1	1	1	1
0	31	0	1	1620	7	1	1	1	0	0	0	0	0	2	wcz+APGAR	tak	0-1	11	1	0	0	1	1	1	1	1	0	0	1	1	1	1	1	15	1	1	1	1	1	1	1	1	1	1	1	1	1	1	1
0	32	0	1	1850	7	1	1	1	0	0	0	0	0	2	wcz+APGAR	tak	0-0	0	0	0	0	0	0	0	0	0	0	0	0	0	0	0	0	0	0	0	0	0	0	0	0	0	0	0	0	0	0	0	0
0	32	0	1	1850	7	1	1	1	0	0	0	0	0	2	wcz+APGAR	tak	0-0	0	0	0	0	0	0	0	0	0	0	0	0	0	0	0	0	0	0	0	0	0	0	0	0	0	0	0	0	0	0	0	0
1	32	0	1	2320	9	2	OK	0	0	0	0	0	0	1	wcz	tak	1-1	15	1	1	1	1	1	1	1	1	1	1	1	1	1	1	1	15	1	1	1	1	1	1	1	1	1	1	1	1	1	1	1
1	32	0	1	2320	9	2	OK	0	0	0	0	0	0	1	wcz	tak	1-1	15	1	1	1	1	1	1	1	1	1	1	1	1	1	1	1	15	1	1	1	1	1	1	1	1	1	1	1	1	1	1	1
0	33	0	1	1560	8	2	OK	0	0	0	0	0	0	1	wcz	tak	0-0	9	1	0	0	1	1	1	1	0	0	0	0	1	1	1	1	7	1	0	0	0	1	1	1	1	1	1	0	0	0	1	1
1	33	0	1	1820	10	2	OK	0	0	0	0	0	0	1	wcz	tak	0-0	8	0	0	0	1	1	1	1	0	0	0	0	1	1	1	1	6	0	0	0	0	1	1	1	1	1	1	0	0	0	0	0
1	33	0	1	1820	10	2	OK	0	0	0	0	0	0	1	wcz	tak	0-0	8	0	0	0	1	1	1	1	0	0	0	0	1	1	1	1	6	0	0	0	0	1	1	1	1	1	1	0	0	0	0	0
0	33	0	1	1690	10	2	OK	0	0	0	0	0	0	1	wcz	tak	0-0	6	0	0	0	0	0	1	1	0	0	0	0	1	1	1	1	11	1	0	0	0	1	1	1	1	1	1	0	1	1	1	1
1	33	0	1	1600	8	2	OK	0	0	0	0	0	0	1	wcz	tak	1-1	15	1	1	1	1	1	1	1	1	1	1	1	1	1	1	1	15	1	1	1	1	1	1	1	1	1	1	1	1	1	1	1
0	33	0	1	2770	10	2	OK	0	0	0	0	0	0	1	wcz	tak	1-1	15	1	1	1	1	1	1	1	1	1	1	1	1	1	1	1	15	1	1	1	1	1	1	1	1	1	1	1	1	1	1	1
1	34	0	1	1710	9	2	OK	0	0	0	0	0	0	1	wcz	tak	0-0	0	0	0	0	0	0	0	0	0	0	0	0	0	0	0	0	2	0	0	0	0	0	0	0	1	0	1	0	0	0	0	0
1	34	0	1	3030	10	2	OK	0	0	0	0	0	0	1	wcz	tak	1-1	15	1	1	1	1	1	1	1	1	1	1	1	1	1	1	1	15	1	1	1	1	1	1	1	1	1	1	1	1	1	1	1
1	34	0	1	2080	9	2	OK	0	0	0	0	0	0	1	wcz	tak	1-1	11	1	1	1	1	1	1	1	0	1	1	0	0	0	0	0	9	1	0	1	1	1	1	1	1	1	1	0	0	0	0	0
0	34	0	1	1560	10	2	OK	0	0	0	0	0	0	1	wcz	tak	0-0	8	0	0	0	1	1	1	1	0	0	0	0	1	1	1	1	5	0	0	1	0	1	0	1	0	1	1	0	0	0	0	0
0	34	0	1	3030	10	2	OK	0	0	0	0	0	0	1	wcz	tak	1-1	15	1	1	1	1	1	1	1	1	1	1	1	1	1	1	1	15	1	1	1	1	1	1	1	1	1	1	1	1	1	1	1
1	35	0	1	2200	10	2	OK	0	0	0	0	0	0	1	wcz	tak	0-1	9	1	0	0	0	0	1	1	1	0	0	1	1	1	1	1	9	1	1	0	0	0	0	1	1	0	0	1	1	1	1	1
1	35	0	1	2180	8	2	OK	0	0	0	0	0	0	1	wcz	tak	1-1	15	1	1	1	1	1	1	1	1	1	1	1	1	1	1	1	15	1	1	1	1	1	1	1	1	1	1	1	1	1	1	1
0	35	0	1	2420	10	2	OK	0	0	0	0	0	0	1	wcz	tak	0-1	9	0	0	0	1	1	1	1	0	0	0	1	1	1	1	1	15	1	1	1	1	1	1	1	1	1	1	1	1	1	1	1
0	35	0	1	2460	10	2	OK	0	0	0	0	0	0	1	wcz	tak	1-1	15	1	1	1	1	1	1	1	1	1	1	1	1	1	1	1	15	1	1	1	1	1	1	1	1	1	1	1	1	1	1	1
1	35	0	1	2650	9	2	OK	0	0	0	0	0	0	1	wcz	tak	1-1	15	1	1	1	1	1	1	1	1	1	1	1	1	1	1	1	15	1	1	1	1	1	1	1	1	1	1	1	1	1	1	1
0	35	0	1	1830	8	2	OK	0	0	0	0	0	0	1	wcz	tak	1-1	15	1	1	1	1	1	1	1	1	1	1	1	1	1	1	1	15	1	1	1	1	1	1	1	1	1	1	1	1	1	1	1
1	35	0	1	2600	10	2	OK	0	0	0	0	0	0	1	wcz	tak	1-1	15	1	1	1	1	1	1	1	1	1	1	1	1	1	1	1	8	1	1	0	0	1	1	1	1	1	1	0	0	0	0	0
1	35	0	1	2830	10	2	OK	0	0	0	0	0	0	1	wcz	tak	1-1	15	1	1	1	1	1	1	1	1	1	1	1	1	1	1	1	15	1	1	1	1	1	1	1	1	1	1	1	1	1	1	1
0	35	0	1	3130	9	2	OK	0	0	0	0	0	0	1	wcz	tak	0-1	11	1	0	0	1	1	1	1	1	0	0	1	1	1	1	1	15	1	1	1	1	1	1	1	1	1	1	1	1	1	1	1
0	35	0	1	2420	10	2	OK	0	0	0	0	0	0	1	wcz	tak	0-1	9	0	0	0	1	1	1	1	0	0	0	1	1	1	1	1	15	1	1	1	1	1	1	1	1	1	1	1	1	1	1	1
0	35	0	1	2260	9	2	OK	0	0	0	0	0	0	1	wcz	tak	1-1	15	1	1	1	1	1	1	1	1	1	1	1	1	1	1	1	15	1	1	1	1	1	1	1	1	1	1	1	1	1	1	1
1	35	0	1	1570	10	2	OK	0	0	0	0	0	0	1	wcz	tak	1-1	15	1	1	1	1	1	1	1	1	1	1	1	1	1	1	1	15	1	1	1	1	1	1	1	1	1	1	1	1	1	1	1
1	35	0	1	1570	10	2	OK	0	0	0	0	0	0	1	wcz	tak	1-1	15	1	1	1	1	1	1	1	1	1	1	1	1	1	1	1	15	1	1	1	1	1	1	1	1	1	1	1	1	1	1	1
0	35	0	1	2260	9	2	OK	0	0	0	0	0	0	1	wcz	tak	1-1	15	1	1	1	1	1	1	1	1	1	1	1	1	1	1	1	15	1	1	1	1	1	1	1	1	1	1	1	1	1	1	1
0	35	0	1	1830	8	2	OK	0	0	0	0	0	0	1	wcz	tak	1-1	15	1	1	1	1	1	1	1	1	1	1	1	1	1	1	1	15	1	1	1	1	1	1	1	1	1	1	1	1	1	1	1
1	35	0	1	2650	9	2	OK	0	0	0	0	0	0	1	wcz	tak	1-1	15	1	1	1	1	1	1	1	1	1	1	1	1	1	1	1	15	1	1	1	1	1	1	1	1	1	1	1	1	1	1	1
0	35	0	1	1930	10	2	OK	0	0	0	0	0	0	1	wcz	tak	0-0	0	0	0	0	0	0	0	0	0	0	0	0	0	0	0	0	0	0	0	0	0	0	0	0	0	0	0	0	0	0	0	0
1	36	0	1	2830	9	2	OK	0	0	0	0	0	0	1	wcz	tak	0-0	2	0	0	0	0	0	0	0	0	0	0	0	0	0	1	1	0	0	0	0	0	0	0	0	0	0	0	0	0	0	0	0
1	36	0	1	2530	10	2	OK	0	0	0	0	0	0	1	wcz	tak	0-0	8	1	0	0	0	0	1	1	0	0	0	1	1	1	1	1	11	0	0	0	0	1	1	1	1	1	1	1	1	1	1	1
0	36	0	1	2770	10	2	OK	0	0	0	0	0	0	1	wcz	tak	0-0	13	1	0	0	1	1	1	1	1	1	1	1	1	1	1	1	12	0	1	0	0	1	1	1	1	1	1	1	1	1	1	1
0	36	0	1	3130	10	2	OK	0	0	0	0	0	0	1	wcz	tak	1-1	15	1	1	1	1	1	1	1	1	1	1	1	1	1	1	1	15	1	1	1	1	1	1	1	1	1	1	1	1	1	1	1
0	36	0	1	2770	10	2	OK	0	0	0	0	0	0	1	wcz	tak	0-0	13	1	0	0	1	1	1	1	1	1	1	1	1	1	1	1	12	0	1	0	0	1	1	1	1	1	1	1	1	1	1	1
1	36	0	1	2530	10	2	OK	0	0	0	0	0	0	1	wcz	tak	0-0	8	1	0	0	0	0	1	1	0	0	0	1	1	1	1	1	11	0	0	0	0	1	1	1	1	1	1	1	1	1	1	1
1	36	0	1	2920	10	2	OK	0	0	0	0	0	0	1	wcz	tak	1-1	15	1	1	1	1	1	1	1	1	1	1	1	1	1	1	1	15	1	1	1	1	1	1	1	1	1	1	1	1	1	1	1
0	36	0	1	2970	8	2	OK	0	0	0	0	0	0	1	wcz	tak	1-1	15	1	1	1	1	1	1	1	1	1	1	1	1	1	1	1	15	1	1	1	1	1	1	1	1	1	1	1	1	1	1	1
1	36	0	1	2340	10	2	OK	0	0	0	0	0	0	1	wcz	tak	1-1	15	1	1	1	1	1	1	1	1	1	1	1	1	1	1	1	15	1	1	1	1	1	1	1	1	1	1	1	1	1	1	1
1	36	0	1	3520	10	2	OK	0	0	0	0	0	0	1	wcz	tak	1-1	15	1	1	1	1	1	1	1	1	1	1	1	1	1	1	1	15	1	1	1	1	1	1	1	1	1	1	1	1	1	1	1
0	36	0	1	3130	10	2	OK	0	0	0	0	0	0	1	wcz	tak	1-1	15	1	1	1	1	1	1	1	1	1	1	1	1	1	1	1	15	1	1	1	1	1	1	1	1	1	1	1	1	1	1	1
0	36	0	1	2600			1	1	0	0	0	0	0	2	wcz	tak	0-0	0	0	0	0	0	0	0	0	0	0	0	0	0	0	0	0	0	0	0	0	0	0	0	0	0	0	0	0	0	0	0	0
0	37	0	1	2550	10	2	OK	0	0	0	0	0	0	1	wcz	tak	0-0	9	1	0	0	1	1	1	1	0	0	0	0	1	1	1	1	11	1	0	0	0	1	1	1	1	1	1	0	1	1	1	1
0	37	0	1	3150	8	2	OK	0	0	0	0	0	0	1	wcz	tak	0-0	7	0	0	0	0	0	1	1	0	0	0	1	1	1	1	1	9	0	0	0	0	1	1	1	1	1	1	1	1	1	1	1
1	37	0	1	2820	10	2	OK	0	0	0	0	0	0	1	wcz	tak	0-0	6	0	0	0	1	1	1	1	0	0	0	0	0	0	1	1	6	0	0	0	0	1	1	1	1	1	1	0	0	0	0	0
0	37	0	1	2770	10	2	OK	0	0	0	0	0	0	1	wcz	tak	0-0	9	0	0	1	1	1	1	1	0	0	0	0	1	1	1	1	11	0	0	0	1	1	1	1	1	1	1	0	1	1	1	1
0	37	0	1	2630	10	2	OK	0	0	0	0	0	0	1	wcz	tak	1-1	15	1	1	1	1	1	1	1	1	1	1	1	1	1	1	1	15	1	1	1	1	1	1	1	1	1	1	1	1	1	1	1
0	37	0	1	3200	10	2	OK	0	0	0	0	0	0	1	wcz	tak	1-1	15	1	1	1	1	1	1	1	1	1	1	1	1	1	1	1	15	1	1	1	1	1	1	1	1	1	1	1	1	1	1	1
1	37	0	1	2270	10	2	OK	0	0	0	0	0	0	1	wcz	tak	1-1	15	1	1	1	1	1	1	1	1	1	1	1	1	1	1	1	15	1	1	1	1	1	1	1	1	1	1	1	1	1	1	1
0	37	0	1	2670	10	2	OK	0	0	0	0	0	0	1	wcz	tak	1-1	12	0	1	0	1	1	1	1	0	1	1	1	1	1	1	1	12	0	0	0	1	1	1	1	1	1	1	1	1	1	1	1
1	37	0	1	3400	9	2	OK	0	0	0	0	0	0	1	wcz	tak	1-1	15	1	1	1	1	1	1	1	1	1	1	1	1	1	1	1	15	1	1	1	1	1	1	1	1	1	1	1	1	1	1	1
0	37	0	1	2950	9	2	OK	0	0	0	0	0	0	1	wcz	tak	1-1	15	1	1	1	1	1	1	1	1	1	1	1	1	1	1	1	15	1	1	1	1	1	1	1	1	1	1	1	1	1	1	1
1	37	0	1	3910	10	2	OK	0	0	0	0	0	0	1	wcz	tak	1-1	15	1	1	1	1	1	1	1	1	1	1	1	1	1	1	1	15	1	1	1	1	1	1	1	1	1	1	1	1	1	1	1
0	37	0	1	2370	10	2	OK	0	0	0	0	0	0	1	wcz	tak	1-1	15	1	1	1	1	1	1	1	1	1	1	1	1	1	1	1	15	1	1	1	1	1	1	1	1	1	1	1	1	1	1	1
1	37	0	1	3900	10	2	OK	0	0	0	0	0	0	1	wcz	tak	1-1	15	1	1	1	1	1	1	1	1	1	1	1	1	1	1	1	15	1	1	1	1	1	1	1	1	1	1	1	1	1	1	1
1	37	0	1	3100	9	2	OK	0	0	0	0	0	0	1	wcz	tak	1-0	13	0	1	1	1	1	1	1	0	1	1	1	1	1	1	1	13	0	0	1	1	1	1	1	1	1	1	1	1	1	1	1
0	37	0	1	3140	10	2	OK	0	0	0	0	0	0	1	wcz	tak	1-1	15	1	1	1	1	1	1	1	1	1	1	1	1	1	1	1	15	1	1	1	1	1	1	1	1	1	1	1	1	1	1	1
1	37	0	1	3440	10	2	OK	0	0	0	0	0	0	1	wcz	tak	0-0	13	0	0	1	1	1	1	1	1	1	1	1	1	1	1	1	9	0	0	0	1	1	1	1	0	0	0	1	1	1	1	1
0	37	0	1	3200	10	2	OK	0	0	0	0	0	0	1	wcz	tak	1-1	15	1	1	1	1	1	1	1	1	1	1	1	1	1	1	1	15	1	1	1	1	1	1	1	1	1	1	1	1	1	1	1
1	37	0	1	3280	10	2	OK	0	0	0	0	0	0	1	wcz	tak	1-1	15	1	1	1	1	1	1	1	1	1	1	1	1	1	1	1	15	1	1	1	1	1	1	1	1	1	1	1	1	1	1	1
0	37	0	1	2400	8	2	OK	0	0	0	0	0	0	1	wcz	tak	1-1	15	1	1	1	1	1	1	1	1	1	1	1	1	1	1	1	15	1	1	1	1	1	1	1	1	1	1	1	1	1	1	1
0	37	0	1	3800	10	2	OK	0	0	0	0	0	0	1	wcz	tak	1-1	15	1	1	1	1	1	1	1	1	1	1	1	1	1	1	1	15	1	1	1	1	1	1	1	1	1	1	1	1	1	1	1
1	37	0	1	2480	10	2	OK	0	0	0	0	0	0	1	wcz	tak	1-1	15	1	1	1	1	1	1	1	1	1	1	1	1	1	1	1	15	1	1	1	1	1	1	1	1	1	1	1	1	1	1	1
1	37	0	1	2490	10	2	OK	0	0	0	0	0	0	1	wcz	tak	1-1	15	1	1	1	1	1	1	1	1	1	1	1	1	1	1	1	15	1	1	1	1	1	1	1	1	1	1	1	1	1	1	1
1	37	0	1	3580	10	2	OK	0	0	0	0	0	0	1	wcz	tak	1-1	15	1	1	1	1	1	1	1	1	1	1	1	1	1	1	1	15	1	1	1	1	1	1	1	1	1	1	1	1	1	1	1
1	37	0	1	3170	10	2	OK	0	0	0	0	0	0	1	wcz	tak	1-1	15	1	1	1	1	1	1	1	1	1	1	1	1	1	1	1	15	1	1	1	1	1	1	1	1	1	1	1	1	1	1	1
1	37	0	1	3170	10	2	OK	0	0	0	0	0	0	1	wcz	tak	1-1	15	1	1	1	1	1	1	1	1	1	1	1	1	1	1	1	15	1	1	1	1	1	1	1	1	1	1	1	1	1	1	1
0	37	0	1	3450	10	2	OK	0	0	0	0	0	0	1	wcz	tak	1-1	15	1	1	1	1	1	1	1	1	1	1	1	1	1	1	1	15	1	1	1	1	1	1	1	1	1	1	1	1	1	1	1
1	37	0	1	2870	9	2	OK	0	0	0	0	0	0	1	wcz	tak	1-1	15	1	1	1	1	1	1	1	1	1	1	1	1	1	1	1	15	1	1	1	1	1	1	1	1	1	1	1	1	1	1	1
0	37	0	1	2400	8	2	OK	0	0	0	0	0	0	1	wcz	tak	1-1	15	1	1	1	1	1	1	1	1	1	1	1	1	1	1	1	15	1	1	1	1	1	1	1	1	1	1	1	1	1	1	1
0	37	0	1	2370	10	2	OK	0	0	0	0	0	0	1	wcz	tak	1-1	15	1	1	1	1	1	1	1	1	1	1	1	1	1	1	1	15	1	1	1	1	1	1	1	1	1	1	1	1	1	1	1
1	37	0	1	3900	10	2	OK	0	0	0	0	0	0	1	wcz	tak	1-1	15	1	1	1	1	1	1	1	1	1	1	1	1	1	1	1	15	1	1	1	1	1	1	1	1	1	1	1	1	1	1	1
0	37	0	1	2770	10	2	OK	0	0	0	0	0	0	1	wcz	tak	1-1	15	1	1	1	1	1	1	1	1	1	1	1	1	1	1	1	15	1	1	1	1	1	1	1	1	1	1	1	1	1	1	1
0	37	0	1	2950	9	2	OK	0	0	0	0	0	0	1	wcz	tak	1-1	15	1	1	1	1	1	1	1	1	1	1	1	1	1	1	1	15	1	1	1	1	1	1	1	1	1	1	1	1	1	1	1
1	37	0	1	3400	9	2	OK	0	0	0	0	0	0	1	wcz	tak	1-1	15	1	1	1	1	1	1	1	1	1	1	1	1	1	1	1	15	1	1	1	1	1	1	1	1	1	1	1	1	1	1	1
1	36	0	1	2110	10	2	OK	0	0	0	0	1	0	2	wcz+hipo	tak	0-0	2	0	0	0	0	0	0	0	0	0	0	0	0	0	1	1	0	0	0	0	0	0	0	0	0	0	0	0	0	0	0	0
0	37	0	1	1340	10	2	OK	0	0	0	0	1	0	2	wcz+hipo	tak	0-0	0	0	0	0	0	0	0	0	0	0	0	0	0	0	0	0	6	0	0	0	0	1	1	1	1	1	1	0	0	0	0	0
0	37	0	1	1340	10	2	OK	0	0	0	0	1	0	2	wcz+hipo	tak	0-0	0	0	0	0	0	0	0	0	0	0	0	0	0	0	0	0	6	0	0	0	0	1	1	1	1	1	1	0	0	0	0	0
0	34	0	1	1650	9	2	OK	0	0	0	0	1	1	3	wcz+hipo+hyper	tak	0-0	0	0	0	0	0	0	0	0	0	0	0	0	0	0	0	0	0	0	0	0	0	0	0	0	0	0	0	0	0	0	0	0
0	33	0	1	1290	10	2	OK	0	0	0	0	0	1	2	wcz+hyper	tak	0-1	13	1	0	1	1	1	1	1	1	0	1	1	1	1	1	1	15	1	1	1	1	1	1	1	1	1	1	1	1	1	1	1
0	33	0	1	1710	10	2	OK	0	0	0	0	0	1	2	wcz+hyper	tak	1-1	15	1	1	1	1	1	1	1	1	1	1	1	1	1	1	1	15	1	1	1	1	1	1	1	1	1	1	1	1	1	1	1
0	33	0	1	1290	10	2	OK	0	0	0	0	0	1	2	wcz+hyper	tak	0-1	13	1	0	1	1	1	1	1	1	0	1	1	1	1	1	1	15	1	1	1	1	1	1	1	1	1	1	1	1	1	1	1
0	33	0	1	1710	10	2	OK	0	0	0	0	0	1	2	wcz+hyper	tak	1-1	15	1	1	1	1	1	1	1	1	1	1	1	1	1	1	1	15	1	1	1	1	1	1	1	1	1	1	1	1	1	1	1
0	34	0	1	2270	10	2	OK	0	0	0	0	0	1	2	wcz+hyper	tak	0-0	1	0	1	0	0	0	0	0	0	0	0	0	0	0	0	0	9	1	0	0	0	1	1	1	1	1	1	0	1	1	0	0
0	34	0	1	2270	10	2	OK	0	0	0	0	0	1	2	wcz+hyper	tak	0-0	1	0	1	0	0	0	0	0	0	0	0	0	0	0	0	0	9	1	0	0	0	1	1	1	1	1	1	0	1	1	0	0
0	34	0	1	2320	9	2	OK	0	0	0	0	0	1	2	wcz+hyper	tak	0-0	0	0	0	0	0	0	0	0	0	0	0	0	0	0	0	0	0	0	0	0	0	0	0	0	0	0	0	0	0	0	0	0
1	34	0	1	2250	10	2	OK	0	0	0	0	0	1	2	wcz+hyper	tak	1-1	15	1	1	1	1	1	1	1	1	1	1	1	1	1	1	1	15	1	1	1	1	1	1	1	1	1	1	1	1	1	1	1
0	35	0	1	2050	8	2	OK	0	0	0	0	0	1	2	wcz+hyper	tak	0-0	0	0	0	0	0	0	0	0	0	0	0	0	0	0	0	0	0	0	0	0	0	0	0	0	0	0	0	0	0	0	0	0
0	37	0	1	3560	10	2	OK	0	0	0	0	0	1	2	wcz+hyper	tak	0-0	8	0	0	0	1	1	1	1	0	0	0	0	1	1	1	1	9	1	0	0	0	1	1	1	1	1	1	0	1	1	0	0
1	31	0	1	1410	8	2	OK	0	1	1	0	0	0	2	wcz+IVH	tak	0-0	11	1	0	0	0	0	1	1	1	1	1	1	1	1	1	1	11	0	0	0	0	1	1	1	1	1	1	1	1	1	1	1
1	35	0	1	2580	7	2	OK	0	1	1	0	0	0	2	wcz+IVH	tak	0-0	6	0	0	0	1	1	1	1	0	0	0	0	0	0	1	1	6	0	0	0	0	1	1	1	1	1	1	0	0	0	0	0
0	35	0	1	2670	9	2	OK	0	1	1	0	0	0	2	wcz+IVH	tak	0-1	7	1	0	0	1	1	0	0	0	0	0	0	1	1	1	1	6	1	0	0	0	0	0	0	0	0	0	1	1	1	1	1
1	35	0	1	2480	10	2	OK	0	1	2	0	0	0	2	wcz+IVH	tak	0-1	9	1	0	0	0	0	1	1	1	0	0	1	1	1	1	1	9	1	1	0	0	0	0	1	1	0	0	1	1	1	1	1
0	35	0	1	1780	9	2	OK	0	1	2	0	0	0	2	wcz+IVH	tak	1-1	15	1	1	1	1	1	1	1	1	1	1	1	1	1	1	1	15	1	1	1	1	1	1	1	1	1	1	1	1	1	1	1
0	35	0	1	1780	9	2	OK	0	1	2	0	0	0	2	wcz+IVH	tak	1-1	15	1	1	1	1	1	1	1	1	1	1	1	1	1	1	1	15	1	1	1	1	1	1	1	1	1	1	1	1	1	1	1
1	30	0	1	740	7	1	1	1	1	2	0	1	0	4	wcz+IVH+hipo+APGAR	tak	0-0	7	0	0	0	0	0	1	1	0	0	0	1	1	1	1	1	6	0	0	0	0	1	1	1	1	1	1	0	0	0	0	0
1	30	0	1	740	7	2	OK	0	1	2	0	1	0	3	wcz+IVH+hipo	tak	0-0	7	0	0	0	0	0	1	1	0	0	0	1	1	1	1	1	6	0	0	0	0	1	1	1	1	1	1	0	0	0	0	0
0	33	0	1	1280	8	2	OK	0	1	2	0	1	1	4	wcz+IVH+hipo+hyper	tak	0-0	5	0	1	0	1	0	1	0	0	0	0	0	0	0	1	1	4	0	0	1	0	1	0	1	0	1	0	0	0	0	0	0
0	32	0	1	1850	8	2	OK	0	1	2	0	0	1	3	wcz+IVH+hyper	tak	0-0	0	0	0	0	0	0	0	0	0	0	0	0	0	0	0	0	0	0	0	0	0	0	0	0	0	0	0	0	0	0	0	0
0	34	0	1	1780	9	2	OK	0	1	2	0	0	1	3	wcz+IVH+hyper	tak	0-0	0	0	0	0	0	0	0	0	0	0	0	0	0	0	0	0	2	0	0	0	0	0	0	1	1	0	0	0	0	0	0	0
0	34	0	1	2040	8	2	OK	0	0	0	1	0	1	3	wcz+IVH+hyper	tak	1-1	12	0	1	1	1	1	1	1	0	0	1	1	1	1	1	1	15	1	1	1	1	1	1	1	1	1	1	1	1	1	1	1
1	36	0	1	2700	10	2	OK	0	0	0	1	0	1	3	wcz+IVH+hyper	tak	1-1	15	1	1	1	1	1	1	1	1	1	1	1	1	1	1	1	15	1	1	1	1	1	1	1	1	1	1	1	1	1	1	1
1	37	0	1	2850	9	2	OK	0	1	1	0	0	1	3	wcz+IVH+hyper	tak	0-0	2	0	0	0	0	0	0	0	0	0	0	0	0	0	1	1	7	0	0	0	0	1	1	1	0	1	1	0	1	1	0	0
1	25	0	1	550	7	2	OK	0	1	1	1	0	0	3	wcz+IVH+RDS	tak	0-0	0	0	0	0	0	0	0	0	0	0	0	0	0	0	0	0	0	0	0	0	0	0	0	0	0	0	0	0	0	0	0	0
1	26	0	1	790	3	0	1	1	1	3	1	0	0	4	wcz+IVH+RDS+APGAR	tak	0-0	4	0	0	0	0	0	0	0	0	0	0	0	1	1	1	1	4	0	0	0	0	0	0	1	1	1	1	0	0	0	0	0
0	26	0	1	700	8	2	OK	0	1	3	1	0	0	3	wcz+IVH+RDS	tak	0-1	6	0	0	0	0	0	1	1	0	0	0	0	1	1	1	1	13	0	0	1	1	1	1	1	1	1	1	1	1	1	1	1
0	26	0	1	930	7	2	OK	0	1	3	1	0	0	3	wcz+IVH+RDS	tak	1-1	15	1	1	1	1	1	1	1	1	1	1	1	1	1	1	1	15	1	1	1	1	1	1	1	1	1	1	1	1	1	1	1
0	27	0	1	1110	8	2	OK	0	1	2	1	0	0	3	wcz+IVH+RDS	tak	0-0	0	0	0	0	0	0	0	0	0	0	0	0	0	0	0	0	0	0	0	0	0	0	0	0	0	0	0	0	0	0	0	0
0	30	0	1	1470	8	2	OK	0	1	1	1	0	0	3	wcz+IVH+RDS	tak	1-1	15	1	1	1	1	1	1	1	1	1	1	1	1	1	1	1	15	1	1	1	1	1	1	1	1	1	1	1	1	1	1	1
0	31	0	1	1700	8	2	OK	0	1	2	1	0	0	3	wcz+IVH+RDS	tak	1-1	15	1	1	1	1	1	1	1	1	1	1	1	1	1	1	1	15	1	1	1	1	1	1	1	1	1	1	1	1	1	1	1
1	35	0	1	2215	4	1	1	1	1	3	1	0	0	4	wcz+IVH+RDS+APGAR	tak	0-1	9	0	0	0	1	1	1	1	0	0	0	1	1	1	1	1	15	1	1	1	1	1	1	1	1	1	1	1	1	1	1	1
1	35	0	1	2530	8	2	OK	0	1	3	1	0	0	3	wcz+IVH+RDS	tak	0-0	0	0	0	0	0	0	0	0	0	0	0	0	0	0	0	0	0	0	0	0	0	0	0	0	0	0	0	0	0	0	0	0
1	35	0	1	2530	8	2	OK	0	1	3	1	0	0	3	wcz+IVH+RDS	tak	0-0	0	0	0	0	0	0	0	0	0	0	0	0	0	0	0	0	6	0	0	0	0	0	0	1	1	0	0	0	1	1	1	1
1	28	0	1	1150	4	1	1	1	1	1	1	0	1	5	wcz+IVH+RDS+hyper+APGAR	tak	0-0	0	0	0	0	0	0	0	0	0	0	0	0	0	0	0	0	0	0	0	0	0	0	0	0	0	0	0	0	0	0	0	0
1	29	0	1	910	6	1	1	1	1	2	1	0	1	5	wcz+IVH+RDS+hyper+APGAR	tak	0-0	0	0	0	0	0	0	0	0	0	0	0	0	0	0	0	0	0	0	0	0	0	0	0	0	0	0	0	0	0	0	0	0
1	30	0	1	1080	9	2	OK	0	1	1	1	0	1	4	wcz+IVH+RDS+hyper	tak	1-0	15	1	1	1	1	1	1	1	1	1	1	1	1	1	1	1	11	1	0	1	1	1	1	1	1	1	1	0	1	1	0	0
0	36	0	1	2650	10	2	OK	0	1	1	1	0	1	4	wcz+IVH+RDS+hyper	tak	0-0	0	0	0	0	0	0	0	0	0	0	0	0	0	0	0	0	0	0	0	0	0	0	0	0	0	0	0	0	0	0	0	0
1	29	0	1	835	6	1	1	1	0	0	1	0	0	3	wcz+RDS+APGAR	tak	0-0	8	0	0	0	0	0	1	1	1	0	0	1	1	1	1	1	12	0	1	0	0	1	1	1	1	1	1	1	1	1	1	1
0	29	0	1	835	6	1	1	1	0	0	1	0	0	3	wcz+RDS+APGAR	tak	0-0	8	0	0	0	0	0	1	1	1	0	0	1	1	1	1	1	12	0	1	0	0	1	1	1	1	1	1	1	1	1	1	1
0	30	0	1	1260	8	2	OK	0	0	0	1	0	0	2	wcz+RDS	tak	1-1	15	1	1	1	1	1	1	1	1	1	1	1	1	1	1	1	15	1	1	1	1	1	1	1	1	1	1	1	1	1	1	1
0	31	0	1	1150	4	1	1	1	0	0	1	0	0	3	wcz+RDS+APGAR	tak	0-0	4	0	0	0	1	1	1	1	0	0	0	0	0	0	0	0	4	0	0	0	0	0	0	1	1	1	1	0	0	0	0	0
0	31	0	1	1950	7	1	1	1	0	0	1	0	0	3	wcz+RDS+APGAR	tak	1-1	15	1	1	1	1	1	1	1	1	1	1	1	1	1	1	1	15	1	1	1	1	1	1	1	1	1	1	1	1	1	1	1
1	31	0	1	1770	6	1	1	1	0	0	1	0	0	3	wcz+RDS+APGAR	tak	1-1	15	1	1	1	1	1	1	1	1	1	1	1	1	1	1	1	15	1	1	1	1	1	1	1	1	1	1	1	1	1	1	1
0	34	0	1	1620	7	2	OK	0	0	0	1	1	1	4	wcz+RDS+hipo+hyper	tak	0-0	0	0	0	0	0	0	0	0	0	0	0	0	0	0	0	0	0	0	0	0	0	0	0	0	0	0	0	0	0	0	0	0
1	37	1	0	3440	10	2	OK	0	0	0	0	0	0	0		nie	0-0	13	0	0	1	1	1	1	1	1	1	1	1	1	1	1	1	9	0	0	0	1	1	1	1	0	0	0	1	1	1	1	1
0	38	1	0	2070	10	2	OK	0	0	0	0	0	0	0		nie	0-0	7	1	0	0	1	1	1	1	0	0	0	0	0	0	1	1	9	1	0	0	0	1	1	1	1	1	1	0	1	1	0	0
1	38	1	0	3750	9	2	OK	0	0	0	0	0	0	0		nie	0-0	4	0	0	0	0	0	0	0	0	0	0	0	1	1	1	1	7	0	0	0	0	1	1	0	1	1	1	0	1	1	0	0
1	38	1	0	2950	10	2	OK	0	0	0	0	0	0	0		nie	0-0	6	1	0	0	1	1	1	1	0	0	0	0	0	0	1	0	11	0	0	1	0	1	1	1	1	1	1	0	1	1	1	1
0	38	1	0	3840	10	2	OK	0	0	0	0	0	0	0		nie	1-1	15	1	1	1	1	1	1	1	1	1	1	1	1	1	1	1	15	1	1	1	1	1	1	1	1	1	1	1	1	1	1	1
1	38	1	0	3650	9	2	OK	0	0	0	0	0	0	0		nie	0-1	10	0	0	0	1	1	1	1	1	0	0	1	1	1	1	1	15	1	1	1	1	1	1	1	1	1	1	1	1	1	1	1
0	38	1	0	3100	9	2	OK	0	0	0	0	0	0	0		nie	0-1	6	0	0	0	1	1	0	0	0	0	0	0	1	1	1	1	7	1	0	0	0	1	1	1	1	1	1	0	0	0	0	0
0	38	1	0	3040	10	2	OK	0	0	0	0	0	0	0		nie	0-0	9	0	0	0	1	1	1	1	0	0	0	1	1	1	1	1	11	0	0	0	0	1	1	1	1	1	1	1	1	1	1	1
0	38	1	0	3600	10	2	OK	0	0	0	0	0	0	0		nie	0-0	9	0	0	0	1	1	1	1	0	0	0	1	1	1	1	1	11	0	0	0	0	1	1	1	1	1	1	1	1	1	1	1
0	38	1	0	2970	10	2	OK	0	0	0	0	0	0	0		nie	1-1	15	1	1	1	1	1	1	1	1	1	1	1	1	1	1	1	15	1	1	1	1	1	1	1	1	1	1	1	1	1	1	1
1	38	1	0	3290	9	2	OK	0	0	0	0	0	0	0		nie	0-0	11	1	0	0	1	1	1	1	1	0	0	1	1	1	1	1	14	1	1	1	0	1	1	1	1	1	1	1	1	1	1	1
1	38	1	0	3050	10	2	OK	0	0	0	0	0	0	0		nie	1-1	15	1	1	1	1	1	1	1	1	1	1	1	1	1	1	1	15	1	1	1	1	1	1	1	1	1	1	1	1	1	1	1
1	38	1	0	3430	8	2	OK	0	0	0	0	0	0	0		nie	0-1	11	1	0	0	1	1	1	1	1	0	0	1	1	1	1	1	13	1	1	0	0	1	1	1	1	1	1	1	1	1	1	1
1	38	1	0	3330	10	2	OK	0	0	0	0	0	0	0		nie	0-0	9	0	1	0	1	1	1	1	0	1	0	0	1	0	1	1	12	0	0	1	1	1	1	1	1	1	1	0	1	1	1	1
0	38	1	0	3480	10	2	OK	0	0	0	0	0	0	0		nie	1-1	15	1	1	1	1	1	1	1	1	1	1	1	1	1	1	1	15	1	1	1	1	1	1	1	1	1	1	1	1	1	1	1
0	38	1	0	3090	10	2	OK	0	0	0	0	0	0	0		nie	1-1	15	1	1	1	1	1	1	1	1	1	1	1	1	1	1	1	15	1	1	1	1	1	1	1	1	1	1	1	1	1	1	1
1	38	1	0	2790	10	2	OK	0	0	0	0	0	0	0		nie	0-0	10	0	1	0	1	1	1	1	0	1	0	0	1	1	1	1	12	0	0	1	0	1	1	1	1	1	1	1	1	1	1	1
0	38	1	0	3200	10	2	OK	0	0	0	0	0	0	0		nie	1-1	15	1	1	1	1	1	1	1	1	1	1	1	1	1	1	1	15	1	1	1	1	1	1	1	1	1	1	1	1	1	1	1
1	38	1	0	3440	10	2	OK	0	0	0	0	0	0	0		nie	1-1	15	1	1	1	1	1	1	1	1	1	1	1	1	1	1	1	15	1	1	1	1	1	1	1	1	1	1	1	1	1	1	1
0	38	1	0	3080	10	2	OK	0	0	0	0	0	0	0		nie	1-0	15	1	1	1	1	1	1	1	1	1	1	1	1	1	1	1	13	0	0	1	1	1	1	1	1	1	1	1	1	1	1	1
1	38	1	0	3650	9	2	OK	0	0	0	0	0	0	0		nie	0-1	10	0	0	0	1	1	1	1	1	0	0	1	1	1	1	1	15	1	1	1	1	1	1	1	1	1	1	1	1	1	1	1
0	38	1	0	3580	10	2	OK	0	0	0	0	0	0	0		nie	1-1	15	1	1	1	1	1	1	1	1	1	1	1	1	1	1	1	15	1	1	1	1	1	1	1	1	1	1	1	1	1	1	1
0	38	1	0	3510	10	2	OK	0	0	0	0	0	0	0		nie	1-1	15	1	1	1	1	1	1	1	1	1	1	1	1	1	1	1	15	1	1	1	1	1	1	1	1	1	1	1	1	1	1	1
0	38	1	0	3150	10	2	OK	0	0	0	0	0	0	0		nie	0-1	9	1	0	0	0	0	1	1	1	0	0	1	1	1	1	1	15	1	1	1	1	1	1	1	1	1	1	1	1	1	1	1
0	38	1	0	3010	9	2	OK	0	0	0	0	0	0	0		nie	0-1	9	1	0	0	0	0	1	1	1	0	0	1	0	0	0	0	15	1	1	1	1	1	1	1	1	1	1	1	1	1	1	1
0	38	1	0	4310	10	2	OK	0	0	0	0	0	0	0		nie	1-1	15	1	1	1	1	1	1	1	1	1	1	1	1	1	1	1	15	1	1	1	1	1	1	1	1	1	1	1	1	1	1	1
0	38	1	0	3050	10	2	OK	0	0	0	0	0	0	0		nie	1-1	15	1	1	1	1	1	1	1	1	1	1	1	1	1	1	1	15	1	1	1	1	1	1	1	1	1	1	1	1	1	1	1
1	38	1	0	2900	10	2	OK	0	0	0	0	0	0	0		nie	1-1	15	1	1	1	1	1	1	1	1	1	1	1	1	1	1	1	15	1	1	1	1	1	1	1	1	1	1	1	1	1	1	1
0	38	1	0	3090	10	2	OK	0	0	0	0	0	0	0		nie	1-1	15	1	1	1	1	1	1	1	1	1	1	1	1	1	1	1	15	1	1	1	1	1	1	1	1	1	1	1	1	1	1	1
1	38	1	0	3360	10	2	OK	0	0	0	0	0	0	0		nie	1-1	15	1	1	1	1	1	1	1	1	1	1	1	1	1	1	1	15	1	1	1	1	1	1	1	1	1	1	1	1	1	1	1
0	38	1	0	3770	9	2	OK	0	0	0	0	0	0	0		nie	1-1	15	1	1	1	1	1	1	1	1	1	1	1	1	1	1	1	15	1	1	1	1	1	1	1	1	1	1	1	1	1	1	1
0	38	1	0	3040	10	2	OK	0	0	0	0	0	0	0		nie	1-1	15	1	1	1	1	1	1	1	1	1	1	1	1	1	1	1	15	1	1	1	1	1	1	1	1	1	1	1	1	1	1	1
1	38	1	0	1970	10	2	OK	0	0	0	0	0	0	0		nie	1-1	15	1	1	1	1	1	1	1	1	1	1	1	1	1	1	1	15	1	1	1	1	1	1	1	1	1	1	1	1	1	1	1
0	38	1	0	3610	10	2	OK	0	0	0	0	0	0	0		nie	1-1	15	1	1	1	1	1	1	1	1	1	1	1	1	1	1	1	15	1	1	1	1	1	1	1	1	1	1	1	1	1	1	1
0	38	1	0	3530	10	2	OK	0	0	0	0	0	0	0		nie	1-1	15	1	1	1	1	1	1	1	1	1	1	1	1	1	1	1	15	1	1	1	1	1	1	1	1	1	1	1	1	1	1	1
0	38	1	0	3480	10	2	OK	0	0	0	0	0	0	0		nie	1-1	15	1	1	1	1	1	1	1	1	1	1	1	1	1	1	1	15	1	1	1	1	1	1	1	1	1	1	1	1	1	1	1
1	38	1	0	3600	9	2	OK	0	0	0	0	0	0	0		nie	1-1	15	1	1	1	1	1	1	1	1	1	1	1	1	1	1	1	15	1	1	1	1	1	1	1	1	1	1	1	1	1	1	1
0	38	1	0	3220	10	2	OK	0	0	0	0	0	0	0		nie	1-1	15	1	1	1	1	1	1	1	1	1	1	1	1	1	1	1	15	1	1	1	1	1	1	1	1	1	1	1	1	1	1	1
1	38	1	0	4480	10	2	OK	0	0	0	0	0	0	0		nie	1-1	15	1	1	1	1	1	1	1	1	1	1	1	1	1	1	1	15	1	1	1	1	1	1	1	1	1	1	1	1	1	1	1
0	38	1	0	3100	9	2	OK	0	0	0	0	0	0	0		nie	1-1	15	1	1	1	1	1	1	1	1	1	1	1	1	1	1	1	15	1	1	1	1	1	1	1	1	1	1	1	1	1	1	1
0	38	1	0	3300	10	2	OK	0	0	0	0	0	0	0		nie	1-1	15	1	1	1	1	1	1	1	1	1	1	1	1	1	1	1	15	1	1	1	1	1	1	1	1	1	1	1	1	1	1	1
0	38	1	0	3140	9	2	OK	0	0	0	0	0	0	0		nie	1-1	15	1	1	1	1	1	1	1	1	1	1	1	1	1	1	1	15	1	1	1	1	1	1	1	1	1	1	1	1	1	1	1
0	38	1	0	3100	9	2	OK	0	0	0	0	0	0	0		nie	1-1	15	1	1	1	1	1	1	1	1	1	1	1	1	1	1	1	15	1	1	1	1	1	1	1	1	1	1	1	1	1	1	1
0	38	1	0	3300	10	2	OK	0	0	0	0	0	0	0		nie	1-1	15	1	1	1	1	1	1	1	1	1	1	1	1	1	1	1	15	1	1	1	1	1	1	1	1	1	1	1	1	1	1	1
0	38	1	0	3140	9	2	OK	0	0	0	0	0	0	0		nie	1-1	15	1	1	1	1	1	1	1	1	1	1	1	1	1	1	1	15	1	1	1	1	1	1	1	1	1	1	1	1	1	1	1
0	38	1	0	3700	10	2	OK	0	0	0	0	0	0	0		nie	1-1	15	1	1	1	1	1	1	1	1	1	1	1	1	1	1	1	15	1	1	1	1	1	1	1	1	1	1	1	1	1	1	1
1	38	1	0	3510	10	2	OK	0	0	0	0	0	0	0		nie	1-1	15	1	1	1	1	1	1	1	1	1	1	1	1	1	1	1	15	1	1	1	1	1	1	1	1	1	1	1	1	1	1	1
0	38	1	0	3400	10	2	OK	0	0	0	0	0	0	0		nie	1-1	15	1	1	1	1	1	1	1	1	1	1	1	1	1	1	1	15	1	1	1	1	1	1	1	1	1	1	1	1	1	1	1
0	38	1	0	3620	10	2	OK	0	0	0	0	0	0	0		nie	1-1	15	1	1	1	1	1	1	1	1	1	1	1	1	1	1	1	15	1	1	1	1	1	1	1	1	1	1	1	1	1	1	1
0	38	1	0	4310	10	2	OK	0	0	0	0	0	0	0		nie	1-1	15	1	1	1	1	1	1	1	1	1	1	1	1	1	1	1	15	1	1	1	1	1	1	1	1	1	1	1	1	1	1	1
0	38	1	0	3480	10	2	OK	0	0	0	0	0	0	0		nie	1-1	15	1	1	1	1	1	1	1	1	1	1	1	1	1	1	1	15	1	1	1	1	1	1	1	1	1	1	1	1	1	1	1
0	38	1	0	2970	10	2	OK	0	0	0	0	0	0	0		nie	1-1	15	1	1	1	1	1	1	1	1	1	1	1	1	1	1	1	15	1	1	1	1	1	1	1	1	1	1	1	1	1	1	1
0	39	1	0	3580	10	2	OK	0	0	0	0	0	0	0		nie	0-1	9	0	0	0	1	1	1	1	0	0	0	1	1	1	1	1	12	1	0	0	0	1	1	1	1	1	1	1	1	1	1	1
1	39	1	0	2990	10	2	OK	0	0	0	0	0	0	0		nie	0-0	0	0	0	0	0	0	0	0	0	0	0	0	0	0	0	0	0	0	0	0	0	0	0	0	0	0	0	0	0	0	0	0
0	39	1	0	3470	10	2	OK	0	0	0	0	0	0	0		nie	0-0	11	1	0	0	1	1	1	1	1	0	0	1	1	1	1	1	13	1	1	0	0	1	1	1	1	1	1	1	1	1	1	1
0	39	1	0	3230	10	2	OK	0	0	0	0	0	0	0		nie	0-0	6	0	0	0	1	1	1	1	0	0	0	0	0	0	1	1	11	1	0	1	1	1	1	1	1	1	1	0	0	0	1	1
0	39	1	0	3980	10	2	OK	0	0	0	0	0	0	0		nie	0-0	6	0	0	0	1	1	1	1	0	0	0	0	0	0	1	1	6	0	0	0	0	1	1	1	1	1	1	0	0	0	0	0
0	39	1	0	3480	10	2	OK	0	0	0	0	0	0	0		nie	1-1	15	1	1	1	1	1	1	1	1	1	1	1	1	1	1	1	15	1	1	1	1	1	1	1	1	1	1	1	1	1	1	1
0	39	1	0	3470	10	2	OK	0	0	0	0	0	0	0		nie	0-0	6	0	0	0	1	1	1	1	0	0	0	0	0	0	1	1	10	0	0	1	1	1	1	1	1	1	1	0	0	0	1	1
1	39	1	0	3660	10	2	OK	0	0	0	0	0	0	0		nie	0-0	2	0	0	0	0	0	1	1	0	0	0	0	0	0	0	1	8	0	0	0	0	1	1	1	1	1	1	0	1	1	0	0
0	39	1	0	3850	10	2	OK	0	0	0	0	0	0	0		nie	0-0	7	0	0	0	1	1	1	1	0	0	0	0	0	1	1	1	9	0	0	0	0	1	1	1	1	1	1	0	1	1	1	0
0	39	1	0	3400	9	2	OK	0	0	0	0	0	0	0		nie	0-0	8	1	0	1	1	1	1	1	0	0	0	0	0	0	1	1	6	0	0	0	0	1	1	1	1	1	1	0	0	0	0	0
0	39	1	0	3020	10	2	OK	0	0	0	0	0	0	0		nie	0-0	0	0	0	0	0	0	1	1	0	0	0	0	1	1	1	1	11	1	0	1	1	1	1	1	1	1	1	0	0	1	1	0
1	39	1	0	3400	10	2	OK	0	0	0	0	0	0	0		nie	0-0	0	0	0	0	0	0	0	0	0	0	0	0	0	0	0	0	0	0	0	0	0	0	0	0	0	0	0	0	0	0	0	0
1	39	1	0	3450	9	2	OK	0	0	0	0	0	0	0		nie	1-1	15	1	1	1	1	1	1	1	1	1	1	1	1	1	1	1	15	1	1	1	1	1	1	1	1	1	1	1	1	1	1	1
0	39	1	0	3540	10	2	OK	0	0	0	0	0	0	0		nie	1-1	15	1	1	1	1	1	1	1	1	1	1	1	1	1	1	1	15	1	1	1	1	1	1	1	1	1	1	1	1	1	1	1
0	39	1	0	3030	10	2	OK	0	0	0	0	0	0	0		nie	1-1	15	1	1	1	1	1	1	1	1	1	1	1	1	1	1	1	15	1	1	1	1	1	1	1	1	1	1	1	1	1	1	1
1	39	1	0	3380	9	2	OK	0	0	0	0	0	0	0		nie	1-0	13	0	0	0	1	1	1	1	1	1	1	1	1	1	1	1	8	0	0	0	1	1	1	1	0	0	0	0	1	1	1	1
1	39	1	0	3300	10	2	OK	0	0	0	0	0	0	0		nie	1-1	15	1	1	1	1	1	1	1	1	1	1	1	1	1	1	1	15	1	1	1	1	1	1	1	1	1	1	1	1	1	1	1
1	39	1	0	3750	10	2	OK	0	0	0	0	0	0	0		nie	1-1	15	1	1	1	1	1	1	1	1	1	1	1	1	1	1	1	15	1	1	1	1	1	1	1	1	1	1	1	1	1	1	1
0	39	1	0	3500	9	2	OK	0	0	0	0	0	0	0		nie	1-1	15	1	1	1	1	1	1	1	1	1	1	1	1	1	1	1	15	1	1	1	1	1	1	1	1	1	1	1	1	1	1	1
0	39	1	0	2780	10	2	OK	0	0	0	0	0	0	0		nie	1-1	15	1	1	1	1	1	1	1	1	1	1	1	1	1	1	1	15	1	1	1	1	1	1	1	1	1	1	1	1	1	1	1
1	39	1	0	3370	10	2	OK	0	0	0	0	0	0	0		nie	1-1	15	1	1	1	1	1	1	1	1	1	1	1	1	1	1	1	15	1	1	1	1	1	1	1	1	1	1	1	1	1	1	1
1	39	1	0	3660	10	2	OK	0	0	0	0	0	0	0		nie	0-0	2	0	0	0	0	0	1	1	0	0	0	0	0	0	0	1	8	0	0	0	0	1	1	1	1	1	1	0	1	1	0	0
0	39	1	0	3820	10	2	OK	0	0	0	0	0	0	0		nie	1-1	15	1	1	1	1	1	1	1	1	1	1	1	1	1	1	1	15	1	1	1	1	1	1	1	1	1	1	1	1	1	1	1
0	39	1	0	2770	10	2	OK	0	0	0	0	0	0	0		nie	1-1	15	1	1	1	1	1	1	1	1	1	1	1	1	1	1	1	15	1	1	1	1	1	1	1	1	1	1	1	1	1	1	1
0	39	1	0	3850	10	2	OK	0	0	0	0	0	0	0		nie	1-1	15	1	1	1	1	1	1	1	1	1	1	1	1	1	1	1	15	1	1	1	1	1	1	1	1	1	1	1	1	1	1	1
0	39	1	0	2500	10	2	OK	0	0	0	0	0	0	0		nie	1-1	15	1	1	1	1	1	1	1	1	1	1	1	1	1	1	1	15	1	1	1	1	1	1	1	1	1	1	1	1	1	1	1
1	39	1	0	3800	10	2	OK	0	0	0	0	0	0	0		nie	1-1	15	1	1	1	1	1	1	1	1	1	1	1	1	1	1	1	15	1	1	1	1	1	1	1	1	1	1	1	1	1	1	1
0	39	1	0	3850	10	2	OK	0	0	0	0	0	0	0		nie	1-1	15	1	1	1	1	1	1	1	1	1	1	1	1	1	1	1	15	1	1	1	1	1	1	1	1	1	1	1	1	1	1	1
0	39	1	0	3750	10	2	OK	0	0	0	0	0	0	0		nie	0-0	12	1	1	0	1	1	1	1	0	1	0	1	1	1	1	1	13	0	0	1	1	1	1	1	1	1	1	1	1	1	1	1
1	39	1	0	3730	9	2	OK	0	0	0	0	0	0	0		nie	1-1	15	1	1	1	1	1	1	1	1	1	1	1	1	1	1	1	15	1	1	1	1	1	1	1	1	1	1	1	1	1	1	1
1	39	1	0	3290	10	2	OK	0	0	0	0	0	0	0		nie	1-1	15	1	1	1	1	1	1	1	1	1	1	1	1	1	1	1	15	1	1	1	1	1	1	1	1	1	1	1	1	1	1	1
0	39	1	0	3570	10	2	OK	0	0	0	0	0	0	0		nie	1-1	15	1	1	1	1	1	1	1	1	1	1	1	1	1	1	1	15	1	1	1	1	1	1	1	1	1	1	1	1	1	1	1
0	39	1	0	3160	10	2	OK	0	0	0	0	0	0	0		nie	1-1	15	1	1	1	1	1	1	1	1	1	1	1	1	1	1	1	15	1	1	1	1	1	1	1	1	1	1	1	1	1	1	1
0	39	1	0	3470	10	2	OK	0	0	0	0	0	0	0		nie	0-0	11	1	0	0	1	1	1	1	1	0	0	1	1	1	1	1	13	1	1	0	0	1	1	1	1	1	1	1	1	1	1	1
0	39	1	0	3180	10	2	OK	0	0	0	0	0	0	0		nie	0-0	11	0	1	0	1	1	1	1	0	1	0	1	1	1	1	1	12	0	0	1	0	1	1	1	1	1	1	1	1	1	1	1
0	39	1	0	3620	10	2	OK	0	0	0	0	0	0	0		nie	1-1	15	1	1	1	1	1	1	1	1	1	1	1	1	1	1	1	15	1	1	1	1	1	1	1	1	1	1	1	1	1	1	1
1	39	1	0	3750	10	2	OK	0	0	0	0	0	0	0		nie	0-0	10	1	0	0	1	1	1	1	0	0	0	1	1	1	1	1	13	1	1	0	0	1	1	1	1	1	1	1	1	1	1	1
0	39	1	0	3840	10	2	OK	0	0	0	0	0	0	0		nie	1-1	15	1	1	1	1	1	1	1	1	1	1	1	1	1	1	1	15	1	1	1	1	1	1	1	1	1	1	1	1	1	1	1
0	39	1	0	3770	10	2	OK	0	0	0	0	0	0	0		nie	1-1	11	1	0	0	1	1	1	1	1	0	0	1	1	1	1	1	15	1	1	1	1	1	1	1	1	1	1	1	1	1	1	1
0	39	1	0	2920	10	2	OK	0	0	0	0	0	0	0		nie	1-1	15	1	1	1	1	1	1	1	1	1	1	1	1	1	1	1	15	1	1	1	1	1	1	1	1	1	1	1	1	1	1	1
0	39	1	0	3400	8	2	OK	0	0	0	0	0	0	0		nie	1-1	15	1	1	1	1	1	1	1	1	1	1	1	1	1	1	1	15	1	1	1	1	1	1	1	1	1	1	1	1	1	1	1
1	39	1	0	3300	10	2	OK	0	0	0	0	0	0	0		nie	1-1	15	1	1	1	1	1	1	1	1	1	1	1	1	1	1	1	15	1	1	1	1	1	1	1	1	1	1	1	1	1	1	1
1	39	1	0	3750	10	2	OK	0	0	0	0	0	0	0		nie	1-1	15	1	1	1	1	1	1	1	1	1	1	1	1	1	1	1	15	1	1	1	1	1	1	1	1	1	1	1	1	1	1	1
1	39	1	0	3650	10	2	OK	0	0	0	0	0	0	0		nie	1-1	15	1	1	1	1	1	1	1	1	1	1	1	1	1	1	1	15	1	1	1	1	1	1	1	1	1	1	1	1	1	1	1
1	39	1	0	3210	10	2	OK	0	0	0	0	0	0	0		nie	1-1	15	1	1	1	1	1	1	1	1	1	1	1	1	1	1	1	15	1	1	1	1	1	1	1	1	1	1	1	1	1	1	1
0	39	1	0	3500	9	2	OK	0	0	0	0	0	0	0		nie	1-1	15	1	1	1	1	1	1	1	1	1	1	1	1	1	1	1	15	1	1	1	1	1	1	1	1	1	1	1	1	1	1	1
0	39	1	0	3510	9	2	OK	0	0	0	0	0	0	0		nie	1-1	15	1	1	1	1	1	1	1	1	1	1	1	1	1	1	1	15	1	1	1	1	1	1	1	1	1	1	1	1	1	1	1
0	39	1	0	3820	10	2	OK	0	0	0	0	0	0	0		nie	1-1	15	1	1	1	1	1	1	1	1	1	1	1	1	1	1	1	15	1	1	1	1	1	1	1	1	1	1	1	1	1	1	1
1	39	1	0	3090	10	2	OK	0	0	0	0	0	0	0		nie	0-1	11	1	0	0	1	1	1	1	1	0	0	1	1	1	1	1	15	1	1	1	1	1	1	1	1	1	1	1	1	1	1	1
0	39	1	0	3450	10	2	OK	0	0	0	0	0	0	0		nie	0-1	9	1	0	0	0	0	1	1	1	0	0	1	1	1	1	1	15	1	1	1	1	1	1	1	1	1	1	1	1	1	1	1
1	39	1	0	3370	10	2	OK	0	0	0	0	0	0	0		nie	1-1	15	1	1	1	1	1	1	1	1	1	1	1	1	1	1	1	15	1	1	1	1	1	1	1	1	1	1	1	1	1	1	1
1	39	1	0	3350	9	2	OK	0	0	0	0	0	0	0		nie	1-1	15	1	1	1	1	1	1	1	1	1	1	1	1	1	1	1	15	1	1	1	1	1	1	1	1	1	1	1	1	1	1	1
1	39	1	0	3510	10	2	OK	0	0	0	0	0	0	0		nie	1-1	15	1	1	1	1	1	1	1	1	1	1	1	1	1	1	1	15	1	1	1	1	1	1	1	1	1	1	1	1	1	1	1
0	39	1	0	3620	10	2	OK	0	0	0	0	0	0	0		nie	1-1	15	1	1	1	1	1	1	1	1	1	1	1	1	1	1	1	15	1	1	1	1	1	1	1	1	1	1	1	1	1	1	1
1	39	1	0	3030	7	2	OK	0	0	0	0	0	0	0		nie	1-1	15	1	1	1	1	1	1	1	1	1	1	1	1	1	1	1	15	1	1	1	1	1	1	1	1	1	1	1	1	1	1	1
0	39	1	0	3850	10	2	OK	0	0	0	0	0	0	0		nie	1-1	15	1	1	1	1	1	1	1	1	1	1	1	1	1	1	1	15	1	1	1	1	1	1	1	1	1	1	1	1	1	1	1
0	39	1	0	2800	7	2	OK	0	0	0	0	0	0	0		nie	1-1	15	1	1	1	1	1	1	1	1	1	1	1	1	1	1	1	15	1	1	1	1	1	1	1	1	1	1	1	1	1	1	1
1	39	1	0	2680	10	2	OK	0	0	0	0	0	0	0		nie	1-1	15	1	1	1	1	1	1	1	1	1	1	1	1	1	1	1	15	1	1	1	1	1	1	1	1	1	1	1	1	1	1	1
0	39	1	0	4480	10	2	OK	0	0	0	0	0	0	0		nie	1-1	15	1	1	1	1	1	1	1	1	1	1	1	1	1	1	1	15	1	1	1	1	1	1	1	1	1	1	1	1	1	1	1
0	39	1	0	4480	10	2	OK	0	0	0	0	0	0	0		nie	1-1	15	1	1	1	1	1	1	1	1	1	1	1	1	1	1	1	15	1	1	1	1	1	1	1	1	1	1	1	1	1	1	1
0	39	1	0	2770	10	2	OK	0	0	0	0	0	0	0		nie	1-1	15	1	1	1	1	1	1	1	1	1	1	1	1	1	1	1	15	1	1	1	1	1	1	1	1	1	1	1	1	1	1	1
1	39	1	0	2840	10	2	OK	0	0	0	0	0	0	0		nie	1-1	15	1	1	1	1	1	1	1	1	1	1	1	1	1	1	1	15	1	1	1	1	1	1	1	1	1	1	1	1	1	1	1
0	39	1	0	3960	10	2	OK	0	0	0	0	0	0	0		nie	1-1	15	1	1	1	1	1	1	1	1	1	1	1	1	1	1	1	15	1	1	1	1	1	1	1	1	1	1	1	1	1	1	1
1	39	1	0	2670	10	2	OK	0	0	0	0	0	0	0		nie	1-1	15	1	1	1	1	1	1	1	1	1	1	1	1	1	1	1	15	1	1	1	1	1	1	1	1	1	1	1	1	1	1	1
1	39	1	0	2980	10	2	OK	0	0	0	0	0	0	0		nie	1-1	15	1	1	1	1	1	1	1	1	1	1	1	1	1	1	1	15	1	1	1	1	1	1	1	1	1	1	1	1	1	1	1
1	39	1	0	3330	10	2	OK	0	0	0	0	0	0	0		nie	1-1	15	1	1	1	1	1	1	1	1	1	1	1	1	1	1	1	15	1	1	1	1	1	1	1	1	1	1	1	1	1	1	1
1	39	1	0	3320	10	2	OK	0	0	0	0	0	0	0		nie	1-1	15	1	1	1	1	1	1	1	1	1	1	1	1	1	1	1	15	1	1	1	1	1	1	1	1	1	1	1	1	1	1	1
1	39	1	0	2970	10	2	OK	0	0	0	0	0	0	0		nie	1-1	15	1	1	1	1	1	1	1	1	1	1	1	1	1	1	1	15	1	1	1	1	1	1	1	1	1	1	1	1	1	1	1
1	39	1	0	3350	9	2	OK	0	0	0	0	0	0	0		nie	1-1	15	1	1	1	1	1	1	1	1	1	1	1	1	1	1	1	15	1	1	1	1	1	1	1	1	1	1	1	1	1	1	1
1	39	1	0	3840	10	2	OK	0	0	0	0	0	0	0		nie	1-1	15	1	1	1	1	1	1	1	1	1	1	1	1	1	1	1	15	1	1	1	1	1	1	1	1	1	1	1	1	1	1	1
0	39	1	0	3770	10	2	OK	0	0	0	0	0	0	0		nie	1-1	15	1	1	1	1	1	1	1	1	1	1	1	1	1	1	1	15	1	1	1	1	1	1	1	1	1	1	1	1	1	1	1
0	39	1	0	3850	10	2	OK	0	0	0	0	0	0	0		nie	1-1	15	1	1	1	1	1	1	1	1	1	1	1	1	1	1	1	15	1	1	1	1	1	1	1	1	1	1	1	1	1	1	1
0	39	1	0	3160	10	2	OK	0	0	0	0	0	0	0		nie	1-1	15	1	1	1	1	1	1	1	1	1	1	1	1	1	1	1	15	1	1	1	1	1	1	1	1	1	1	1	1	1	1	1
0	39	1	0	3570	10	2	OK	0	0	0	0	0	0	0		nie	1-1	15	1	1	1	1	1	1	1	1	1	1	1	1	1	1	1	15	1	1	1	1	1	1	1	1	1	1	1	1	1	1	1
0	39	1	0	3850	10	2	OK	0	0	0	0	0	0	0		nie	1-1	15	1	1	1	1	1	1	1	1	1	1	1	1	1	1	1	15	1	1	1	1	1	1	1	1	1	1	1	1	1	1	1
0	39	1	0	3800	10	2	OK	0	0	0	0	0	0	0		nie	1-1	15	1	1	1	1	1	1	1	1	1	1	1	1	1	1	1	15	1	1	1	1	1	1	1	1	1	1	1	1	1	1	1
1	40	1	0	3060	10	2	OK	0	0	0	0	0	0	0		nie	0-1	9	0	0	0	1	1	1	1	0	0	0	1	1	1	1	1	15	1	1	1	1	1	1	1	1	1	1	1	1	1	1	1
1	40	1	0	3970	10	2	OK	0	0	0	0	0	0	0		nie	0-0	2	0	0	0	0	0	0	0	0	0	0	0	0	0	1	1	6	0	0	0	0	1	1	1	1	1	1	0	0	0	0	0
0	40	1	0	3910	10	2	OK	0	0	0	0	0	0	0		nie	0-0	4	0	0	0	0	0	0	0	0	0	0	0	1	1	1	1	6	0	0	1	1	0	0	0	0	0	0	0	1	1	1	1
1	40	1	0	3970	10	2	OK	0	0	0	0	0	0	0		nie	0-0	2	0	0	0	0	0	0	0	0	0	0	0	0	0	1	1	6	0	0	0	0	1	1	1	1	1	1	0	0	0	0	0
1	40	1	0	3380	10	2	OK	0	0	0	0	0	0	0		nie	0-0	0	0	0	0	0	0	0	0	0	0	0	0	0	0	0	0	0	0	0	0	0	0	0	0	0	0	0	0	0	0	0	0
1	40	1	0	3730	10	2	OK	0	0	0	0	0	0	0		nie	0-0	0	0	0	0	0	0	0	0	0	0	0	0	0	0	0	0	4	0	0	0	0	1	1	0	0	1	1	0	0	0	0	0
1	40	1	0	3790	10	2	OK	0	0	0	0	0	0	0		nie	0-0	0	0	0	0	0	0	0	0	0	0	0	0	0	0	0	0	0	0	0	0	0	0	0	0	0	0	0	0	0	0	0	0
0	40	1	0	3430	10	2	OK	0	0	0	0	0	0	0		nie	0-0	4	0	0	0	1	1	1	1	0	0	0	0	0	0	0	0	8	0	0	1	1	1	1	1	1	1	1	0	0	0	0	0
0	40	1	0	3490	10	2	OK	0	0	0	0	0	0	0		nie	0-0	7	1	0	0	0	0	1	1	0	0	0	0	1	1	1	1	9	0	0	0	0	0	0	1	1	1	1	1	1	1	1	1
1	40	1	0	3580	10	2	OK	0	0	0	0	0	0	0		nie	0-1	2	0	0	0	0	0	0	0	0	0	0	0	0	0	1	1	15	1	1	1	1	1	1	1	1	1	1	1	1	1	1	1
0	40	1	0	3300	10	2	OK	0	0	0	0	0	0	0		nie	0-1	9	1	0	0	0	0	1	1	1	0	0	1	1	1	1	1	9	1	1	0	0	0	0	1	1	0	0	1	1	1	1	1
1	40	1	0	3720	10	2	OK	0	0	0	0	0	0	0		nie	1-1	15	1	1	1	1	1	1	1	1	1	1	1	1	1	1	1	15	1	1	1	1	1	1	1	1	1	1	1	1	1	1	1
1	40	1	0	4120	9	2	OK	0	0	0	0	0	0	0		nie	0-0	9	0	0	0	1	1	1	1	0	0	0	1	1	1	1	1	7	1	0	0	0	1	1	1	1	1	1	1	1	1	1	1
1	40	1	0	3990	10	2	OK	0	0	0	0	0	0	0		nie	1-1	15	1	1	1	1	1	1	1	1	1	1	1	1	1	1	1	15	1	1	1	1	1	1	1	1	1	1	1	1	1	1	1
0	40	1	0	3860	9	2	OK	0	0	0	0	0	0	0		nie	1-1	15	1	1	1	1	1	1	1	1	1	1	1	1	1	1	1	15	1	1	1	1	1	1	1	1	1	1	1	1	1	1	1
0	40	1	0	3020	10	2	OK	0	0	0	0	0	0	0		nie	1-1	15	1	1	1	1	1	1	1	1	1	1	1	1	1	1	1	15	1	1	1	1	1	1	1	1	1	1	1	1	1	1	1
0	40	1	0	3690	10	2	OK	0	0	0	0	0	0	0		nie	1-1	15	1	1	1	1	1	1	1	1	1	1	1	1	1	1	1	15	1	1	1	1	1	1	1	1	1	1	1	1	1	1	1
1	40	1	0	3060	10	2	OK	0	0	0	0	0	0	0		nie	0-0	13	0	1	1	1	1	1	1	0	1	1	1	1	1	1	1	13	0	0	1	1	1	1	1	1	1	1	1	1	1	1	1
1	40	1	0	3300	10	2	OK	0	0	0	0	0	0	0		nie	0-0	13	1	1	1	1	1	1	1	0	1	1	0	1	1	1	1	12	1	0	1	1	1	1	1	1	1	1	0	1	0	1	1
1	40	1	0	3750	10	2	OK	0	0	0	0	0	0	0		nie	1-1	15	1	1	1	1	1	1	1	1	1	1	1	1	1	1	1	15	1	1	1	1	1	1	1	1	1	1	1	1	1	1	1
1	40	1	0	3510	10	2	OK	0	0	0	0	0	0	0		nie	0-0	0	0	0	0	0	0	0	0	0	0	0	0	0	0	0	0	0	0	0	0	0	0	0	0	0	0	0	0	0	0	0	0
1	40	1	0	2350	9	2	OK	0	0	0	0	0	0	0		nie	0-1	11	1	0	0	1	1	1	1	1	0	0	1	1	1	1	1	15	1	1	1	1	1	1	1	1	1	1	1	1	1	1	1
1	40	1	0	2880	10	2	OK	0	0	0	0	0	0	0		nie	1-1	15	1	1	1	1	1	1	1	1	1	1	1	1	1	1	1	15	1	1	1	1	1	1	1	1	1	1	1	1	1	1	1
0	40	1	0	4640	10	2	OK	0	0	0	0	0	0	0		nie	1-1	15	1	1	1	1	1	1	1	1	1	1	1	1	1	1	1	15	1	1	1	1	1	1	1	1	1	1	1	1	1	1	1
0	40	1	0	3430	9	2	OK	0	0	0	0	0	0	0		nie	1-1	15	1	1	1	1	1	1	1	1	1	1	1	1	1	1	1	15	1	1	1	1	1	1	1	1	1	1	1	1	1	1	1
0	40	1	0	4020	10	2	OK	0	0	0	0	0	0	0		nie	1-0	15	1	1	1	1	1	1	1	1	1	1	1	1	1	1	1	13	0	0	1	1	1	1	1	1	1	1	1	1	1	1	1
0	40	1	0	3950	10	2	OK	0	0	0	0	0	0	0		nie	1-1	15	1	1	1	1	1	1	1	1	1	1	1	1	1	1	1	15	1	1	1	1	1	1	1	1	1	1	1	1	1	1	1
0	40	1	0	3250	9	2	OK	0	0	0	0	0	0	0		nie	0-0	8	0	0	0	1	1	1	1	0	0	0	0	1	1	1	1	12	0	0	1	1	1	1	1	1	1	1	0	1	1	1	1
1	40	1	0	3920	10	2	OK	0	0	0	0	0	0	0		nie	0-1	9	0	0	0	1	1	1	1	0	0	0	1	1	1	1	1	15	1	1	1	1	1	1	1	1	1	1	1	1	1	1	1
0	40	1	0	2870	10	2	OK	0	0	0	0	0	0	0		nie	0-0	10	0	0	1	1	1	1	1	0	0	1	0	1	1	1	1	11	0	0	1	0	1	1	1	1	1	1	0	1	1	1	1
0	40	1	0	3960	10	2	OK	0	0	0	0	0	0	0		nie	0-0	11	0	0	1	1	1	1	1	0	0	1	1	1	1	1	1	13	0	0	1	1	1	1	1	1	1	1	1	1	1	1	1
0	40	1	0	3560	10	2	OK	0	0	0	0	0	0	0		nie	1-1	15	1	1	1	1	1	1	1	1	1	1	1	1	1	1	1	15	1	1	1	1	1	1	1	1	1	1	1	1	1	1	1
0	40	1	0	3270	10	2	OK	0	0	0	0	0	0	0		nie	0-0	11	0	1	1	1	1	1	1	0	1	0	0	1	1	1	1	11	0	0	1	0	1	1	1	1	1	1	0	1	1	1	1
1	40	1	0	3470	10	2	OK	0	0	0	0	0	0	0		nie	1-1	15	1	1	1	1	1	1	1	1	1	1	1	1	1	1	1	15	1	1	1	1	1	1	1	1	1	1	1	1	1	1	1
0	40	1	0	4070	8	2	OK	0	0	0	0	0	0	0		nie	0-1	10	1	0	0	1	1	1	1	0	0	0	1	1	1	1	1	14	1	0	1	1	1	1	1	1	1	1	1	1	1	1	1
1	40	1	0	3300	10	2	OK	0	0	0	0	0	0	0		nie	0-0	13	1	1	1	1	1	1	1	0	1	1	0	1	1	1	1	12	1	0	1	1	1	1	1	1	1	1	0	1	0	1	1
0	40	1	0	3020	10	2	OK	0	0	0	0	0	0	0		nie	1-1	15	1	1	1	1	1	1	1	1	1	1	1	1	1	1	1	15	1	1	1	1	1	1	1	1	1	1	1	1	1	1	1
0	40	1	0	2350	10	2	OK	0	0	0	0	0	0	0		nie	0-1	9	0	0	0	1	1	1	1	0	0	0	1	1	1	1	1	11	0	0	1	1	1	1	1	1	1	1	1	1	1	0	0
0	40	1	0	3860	9	2	OK	0	0	0	0	0	0	0		nie	1-1	15	1	1	1	1	1	1	1	1	1	1	1	1	1	1	1	15	1	1	1	1	1	1	1	1	1	1	1	1	1	1	1
0	40	1	0	3400	10	2	OK	0	0	0	0	0	0	0		nie	1-1	15	1	1	1	1	1	1	1	1	1	1	1	1	1	1	1	15	1	1	1	1	1	1	1	1	1	1	1	1	1	1	1
1	40	1	0	3180	10	2	OK	0	0	0	0	0	0	0		nie	1-1	8	0	0	1	0	0	1	1	0	0	1	0	1	1	1	1	14	1	0	1	1	1	1	1	1	1	1	1	1	1	1	1
0	40	1	0	3340	10	2	OK	0	0	0	0	0	0	0		nie	1-1	9	0	0	1	1	1	1	0	0	0	1	1	1	1	1	1	15	1	1	1	1	1	1	1	1	1	1	1	1	1	1	1
1	40	1	0	3010	10	2	OK	0	0	0	0	0	0	0		nie	0-1	9	0	0	0	1	1	1	1	0	0	0	1	1	1	1	1	13	0	0	1	1	1	1	1	1	1	1	1	1	1	1	1
1	40	1	0	3350	10	2	OK	0	0	0	0	0	0	0		nie	1-1	14	1	1	1	1	1	1	1	0	1	1	1	1	1	1	1	13	0	0	1	1	1	1	1	1	1	1	1	1	1	1	1
0	40	1	0	3170	10	2	OK	0	0	0	0	0	0	0		nie	1-1	15	1	1	1	1	1	1	1	1	1	1	1	1	1	1	1	15	1	1	1	1	1	1	1	1	1	1	1	1	1	1	1
1	40	1	0	3750	10	2	OK	0	0	0	0	0	0	0		nie	1-1	15	1	1	1	1	1	1	1	1	1	1	1	1	1	1	1	15	1	1	1	1	1	1	1	1	1	1	1	1	1	1	1
0	40	1	0	3700	10	2	OK	0	0	0	0	0	0	0		nie	0-1	9	0	0	0	1	1	1	1	0	0	0	0	0	0	1	1	15	1	1	1	1	1	1	1	1	1	1	1	1	1	1	1
1	40	1	0	3170	9	2	OK	0	0	0	0	0	0	0		nie	1-1	15	1	1	1	1	1	1	1	1	1	1	1	1	1	1	1	15	1	1	1	1	1	1	1	1	1	1	1	1	1	1	1
0	40	1	0	3410	10	2	OK	0	0	0	0	0	0	0		nie	1-1	15	1	1	1	1	1	1	1	1	1	1	1	1	1	1	1	15	1	1	1	1	1	1	1	1	1	1	1	1	1	1	1
0	40	1	0	3870	8	2	OK	0	0	0	0	0	0	0		nie	0-1	11	1	0	0	0	0	1	1	1	1	1	1	1	1	1	1	15	1	1	1	1	1	1	1	1	1	1	1	1	1	1	1
1	40	1	0	3640	10	2	OK	0	0	0	0	0	0	0		nie	0-0	8	1	0	0	0	0	1	1	0	0	0	1	1	1	1	1	12	1	0	0	0	1	1	1	1	1	1	1	1	1	1	1
0	40	1	0	3110	8	2	OK	0	0	0	0	0	0	0		nie	1-1	15	1	1	1	1	1	1	1	1	1	1	1	1	1	1	1	15	1	1	1	1	1	1	1	1	1	1	1	1	1	1	1
0	40	1	0	4000	10	2	OK	0	0	0	0	0	0	0		nie	1-1	15	1	1	1	1	1	1	1	1	1	1	1	1	1	1	1	15	1	1	1	1	1	1	1	1	1	1	1	1	1	1	1
0	40	1	0	4210	10	2	OK	0	0	0	0	0	0	0		nie	1-1	15	1	1	1	1	1	1	1	1	1	1	1	1	1	1	1	15	1	1	1	1	1	1	1	1	1	1	1	1	1	1	1
1	40	1	0	3720	10	2	OK	0	0	0	0	0	0	0		nie	1-1	15	1	1	1	1	1	1	1	1	1	1	1	1	1	1	1	15	1	1	1	1	1	1	1	1	1	1	1	1	1	1	1
0	40	1	0	3300	9	2	OK	0	0	0	0	0	0	0		nie	1-1	15	1	1	1	1	1	1	1	1	1	1	1	1	1	1	1	15	1	1	1	1	1	1	1	1	1	1	1	1	1	1	1
1	40	1	0	3540	10	2	OK	0	0	0	0	0	0	0		nie	1-1	15	1	1	1	1	1	1	1	1	1	1	1	1	1	1	1	15	1	1	1	1	1	1	1	1	1	1	1	1	1	1	1
1	40	1	0	3900	10	2	OK	0	0	0	0	0	0	0		nie	1-1	15	1	1	1	1	1	1	1	1	1	1	1	1	1	1	1	15	1	1	1	1	1	1	1	1	1	1	1	1	1	1	1
1	40	1	0	3500	10	2	OK	0	0	0	0	0	0	0		nie	1-1	15	1	1	1	1	1	1	1	1	1	1	1	1	1	1	1	15	1	1	1	1	1	1	1	1	1	1	1	1	1	1	1
0	40	1	0	3580	10	2	OK	0	0	0	0	0	0	0		nie	1-1	15	1	1	1	1	1	1	1	1	1	1	1	1	1	1	1	15	1	1	1	1	1	1	1	1	1	1	1	1	1	1	1
1	40	1	0	3900	10	2	OK	0	0	0	0	0	0	0		nie	1-1	15	1	1	1	1	1	1	1	1	1	1	1	1	1	1	1	15	1	1	1	1	1	1	1	1	1	1	1	1	1	1	1
1	40	1	0	4730	10	2	OK	0	0	0	0	0	0	0		nie	1-1	15	1	1	1	1	1	1	1	1	1	1	1	1	1	1	1	15	1	1	1	1	1	1	1	1	1	1	1	1	1	1	1
0	40	1	0	4150	10	2	OK	0	0	0	0	0	0	0		nie	1-1	15	1	1	1	1	1	1	1	1	1	1	1	1	1	1	1	15	1	1	1	1	1	1	1	1	1	1	1	1	1	1	1
0	40	1	0	3400	10	2	OK	0	0	0	0	0	0	0		nie	1-1	15	1	1	1	1	1	1	1	1	1	1	1	1	1	1	1	15	1	1	1	1	1	1	1	1	1	1	1	1	1	1	1
0	40	1	0	4200	10	2	OK	0	0	0	0	0	0	0		nie	1-1	15	1	1	1	1	1	1	1	1	1	1	1	1	1	1	1	15	1	1	1	1	1	1	1	1	1	1	1	1	1	1	1
1	40	1	0	3300	10	2	OK	0	0	0	0	0	0	0		nie	1-1	15	1	1	1	1	1	1	1	1	1	1	1	1	1	1	1	15	1	1	1	1	1	1	1	1	1	1	1	1	1	1	1
1	40	1	0	3240	10	2	OK	0	0	0	0	0	0	0		nie	1-1	15	1	1	1	1	1	1	1	1	1	1	1	1	1	1	1	15	1	1	1	1	1	1	1	1	1	1	1	1	1	1	1
0	40	1	0	4350	10	2	OK	0	0	0	0	0	0	0		nie	1-1	15	1	1	1	1	1	1	1	1	1	1	1	1	1	1	1	15	1	1	1	1	1	1	1	1	1	1	1	1	1	1	1
0	40	1	0	3820	9	2	OK	0	0	0	0	0	0	0		nie	1-1	15	1	1	1	1	1	1	1	1	1	1	1	1	1	1	1	15	1	1	1	1	1	1	1	1	1	1	1	1	1	1	1
1	40	1	0	3390	10	2	OK	0	0	0	0	0	0	0		nie	1-1	15	1	1	1	1	1	1	1	1	1	1	1	1	1	1	1	15	1	1	1	1	1	1	1	1	1	1	1	1	1	1	1
0	40	1	0	3530	10	2	OK	0	0	0	0	0	0	0		nie	1-1	15	1	1	1	1	1	1	1	1	1	1	1	1	1	1	1	15	1	1	1	1	1	1	1	1	1	1	1	1	1	1	1
0	40	1	0	4020	10	2	OK	0	0	0	0	0	0	0		nie	1-1	15	1	1	1	1	1	1	1	1	1	1	1	1	1	1	1	15	1	1	1	1	1	1	1	1	1	1	1	1	1	1	1
0	40	1	0	3950	10	2	OK	0	0	0	0	0	0	0		nie	1-1	15	1	1	1	1	1	1	1	1	1	1	1	1	1	1	1	15	1	1	1	1	1	1	1	1	1	1	1	1	1	1	1
0	40	1	0	3430	9	2	OK	0	0	0	0	0	0	0		nie	1-1	15	1	1	1	1	1	1	1	1	1	1	1	1	1	1	1	15	1	1	1	1	1	1	1	1	1	1	1	1	1	1	1
0	40	1	0	4640	10	2	OK	0	0	0	0	0	0	0		nie	1-1	15	1	1	1	1	1	1	1	1	1	1	1	1	1	1	1	15	1	1	1	1	1	1	1	1	1	1	1	1	1	1	1
1	40	1	0	2880	10	2	OK	0	0	0	0	0	0	0		nie	1-1	15	1	1	1	1	1	1	1	1	1	1	1	1	1	1	1	15	1	1	1	1	1	1	1	1	1	1	1	1	1	1	1
1	40	1	0	3210	10	2	OK	0	0	0	0	0	0	0		nie	0-0	6	0	0	0	1	1	1	1	0	0	0	0	0	0	1	1	6	0	0	0	0	1	1	1	1	1	1	0	0	0	0	0
0	40	1	0	3400	10		1	1	0	0	0	0	0	1		nie	0-0	6	0	0	0	1	1	1	1	0	0	0	0	0	0	1	1	7	1	0	0	0	1	1	1	1	1	1	0	0	0	0	0
0	41	1	0	3430	10	2	OK	0	0	0	0	0	0	0		nie	0-0	0	0	0	0	0	0	0	0	0	0	0	0	0	0	0	0	0	0	0	0	0	0	0	0	0	0	0	0	0	0	0	0
0	41	1	0	3400	10	2	OK	0	0	0	0	0	0	0		nie	0-1	0	0	0	0	0	0	0	0	0	0	0	0	0	0	0	0	0	0	0	0	0	0	0	0	0	0	0	0	0	0	0	0
0	41	1	0	4640	10	2	OK	0	0	0	0	0	0	0		nie	1-1	15	1	1	1	1	1	1	1	1	1	1	1	1	1	1	1	15	1	1	1	1	1	1	1	1	1	1	1	1	1	1	1
1	41	1	0	3560	10	2	OK	0	0	0	0	0	0	0		nie	0-0	11	1	1	0	1	1	1	1	0	1	0	0	1	1	1	1	13	1	0	1	1	1	1	1	1	1	1	0	1	1	1	1
1	41	1	0	4140	10	2	OK	0	0	0	0	0	0	0		nie	0-0	3	0	0	0	1	1	0	0	0	0	0	0	0	0	0	1	6	0	0	0	0	1	1	1	1	1	1	0	0	0	0	0
0	41	1	0	3170	10	2	OK	0	0	0	0	0	0	0		nie	1-0	15	1	1	1	1	1	1	1	1	1	1	1	1	1	1	1	0	0	0	0	0	0	0	0	0	0	0	0	0	0	0	0
0	41	1	0	3610	8	2	OK	0	0	0	0	0	0	0		nie	0-0	10	0	0	1	1	1	1	1	0	0	0	1	1	1	1	1	6	0	0	0	0	1	1	0	0	0	0	0	1	1	1	1
0	41	1	0	3670	9	2	OK	0	0	0	0	0	0	0		nie	0-0	0	0	0	0	0	0	0	0	0	0	0	0	0	0	0	0	0	0	0	0	0	0	0	0	0	0	0	0	0	0	0	0
0	41	1	0	3870	10	2	OK	0	0	0	0	0	0	0		nie	0-1	9	1	0	0	1	1	1	1	0	0	0	0	1	1	1	1	15	1	1	1	1	1	1	1	1	1	1	1	1	1	1	1
1	41	1	0	3050	10	2	OK	0	0	0	0	0	0	0		nie	0-0	7	0	0	0	0	0	1	1	0	0	0	1	1	1	1	1	13	0	0	1	1	1	1	1	1	1	1	1	1	1	1	1
0	41	1	0	2930	10	2	OK	0	0	0	0	0	0	0		nie	1-1	15	1	1	1	1	1	1	1	1	1	1	1	1	1	1	1	15	1	1	1	1	1	1	1	1	1	1	1	1	1	1	1
1	41	1	0	3870	10	2	OK	0	0	0	0	0	0	0		nie	0-0	0	0	0	0	0	0	0	0	0	0	0	0	0	0	0	0	0	0	0	0	0	0	0	0	0	0	0	0	0	0	0	0
0	41	1	0	3970	10	2	OK	0	0	0	0	0	0	0		nie	0-0	4	0	0	0	1	1	0	0	0	0	0	0	0	0	1	1	2	0	0	0	0	0	0	0	0	1	1	0	0	0	0	0
0	41	1	0	3610	8	2	OK	0	0	0	0	0	0	0		nie	0-0	10	0	0	1	1	1	1	1	0	0	0	1	1	1	1	1	6	0	0	0	0	1	1	0	0	0	0	0	1	1	1	1
0	41	1	0	3800	10	2	OK	0	0	0	0	0	0	0		nie	0-1	14	1	1	1	1	1	1	1	0	1	1	1	1	1	1	1	15	1	1	1	1	1	1	1	1	1	1	1	1	1	1	1
0	41	1	0	4360	10	2	OK	0	0	0	0	0	0	0		nie	1-1	15	1	1	1	1	1	1	1	1	1	1	1	1	1	1	1	15	1	1	1	1	1	1	1	1	1	1	1	1	1	1	1
1	41	1	0	3600	10	2	OK	0	0	0	0	0	0	0		nie	1-1	15	1	1	1	1	1	1	1	1	1	1	1	1	1	1	1	15	1	1	1	1	1	1	1	1	1	1	1	1	1	1	1
0	41	1	0	3610	10	2	OK	0	0	0	0	0	0	0		nie	0-1	11	1	0	1	1	1	1	1	0	0	1	0	1	1	1	1	11	0	0	0	1	1	1	1	1	1	1	0	1	1	1	1
1	41	1	0	3270	10	2	OK	0	0	0	0	0	0	0		nie	1-1	15	1	1	1	1	1	1	1	1	1	1	1	1	1	1	1	15	1	1	1	1	1	1	1	1	1	1	1	1	1	1	1
1	41	1	0	3880	10	2	OK	0	0	0	0	0	0	0		nie	0-0	11	1	0	0	1	1	1	1	1	0	0	1	1	1	1	1	13	1	1	0	0	1	1	1	1	1	1	1	1	1	1	1
0	41	1	0	3800	10	2	OK	0	0	0	0	0	0	0		nie	0-1	14	1	1	1	1	1	1	1	0	1	1	1	1	1	1	1	15	1	1	1	1	1	1	1	1	1	1	1	1	1	1	1
0	41	1	0	4640	10	2	OK	0	0	0	0	0	0	0		nie	1-1	15	1	1	1	1	1	1	1	1	1	1	1	1	1	1	1	15	1	1	1	1	1	1	1	1	1	1	1	1	1	1	1
1	41	1	0	3600	10	2	OK	0	0	0	0	0	0	0		nie	1-1	15	1	1	1	1	1	1	1	1	1	1	1	1	1	1	1	15	1	1	1	1	1	1	1	1	1	1	1	1	1	1	1
1	41	1	0	3400	10	2	OK	0	0	0	0	0	0	0		nie	1-1	8	0	0	0	0	0	1	1	1	0	0	1	1	1	1	1	14	0	1	1	1	1	1	1	1	1	1	1	1	1	1	1
0	41	1	0	4360	10	2	OK	0	0	0	0	0	0	0		nie	1-1	15	1	1	1	1	1	1	1	1	1	1	1	1	1	1	1	15	1	1	1	1	1	1	1	1	1	1	1	1	1	1	1
1	41	1	0	3590	10	2	OK	0	0	0	0	0	0	0		nie	1-1	15	1	1	1	1	1	1	1	1	1	1	1	1	1	1	1	15	1	1	1	1	1	1	1	1	1	1	1	1	1	1	1
0	41	1	0	4100	10	2	OK	0	0	0	0	0	0	0		nie	1-1	15	1	1	1	1	1	1	1	1	1	1	1	1	1	1	1	15	1	1	1	1	1	1	1	1	1	1	1	1	1	1	1
1	41	1	0	3520	10	2	OK	0	0	0	0	0	0	0		nie	1-1	15	1	1	1	1	1	1	1	1	1	1	1	1	1	1	1	15	1	1	1	1	1	1	1	1	1	1	1	1	1	1	1
0	41	1	0	3980	10	2	OK	0	0	0	0	0	0	0		nie	1-1	15	1	1	1	1	1	1	1	1	1	1	1	1	1	1	1	15	1	1	1	1	1	1	1	1	1	1	1	1	1	1	1
1	41	1	0	2940	10	2	OK	0	0	0	0	0	0	0		nie	1-1	15	1	1	1	1	1	1	1	1	1	1	1	1	1	1	1	15	1	1	1	1	1	1	1	1	1	1	1	1	1	1	1
1	41	1	0	3840	10	2	OK	0	0	0	0	0	0	0		nie	1-1	15	1	1	1	1	1	1	1	1	1	1	1	1	1	1	1	15	1	1	1	1	1	1	1	1	1	1	1	1	1	1	1
1	41	1	0	2940	10	2	OK	0	0	0	0	0	0	0		nie	1-1	15	1	1	1	1	1	1	1	1	1	1	1	1	1	1	1	15	1	1	1	1	1	1	1	1	1	1	1	1	1	1	1
1	41	1	0	3320	10	2	OK	0	0	0	0	0	0	0		nie	1-1	15	1	1	1	1	1	1	1	1	1	1	1	1	1	1	1	15	1	1	1	1	1	1	1	1	1	1	1	1	1	1	1
1	41	1	0	3440	10	2	OK	0	0	0	0	0	0	0		nie	1-1	15	1	1	1	1	1	1	1	1	1	1	1	1	1	1	1	15	1	1	1	1	1	1	1	1	1	1	1	1	1	1	1
0	41	1	0	4440	10	2	OK	0	0	0	0	0	0	0		nie	1-1	15	1	1	1	1	1	1	1	1	1	1	1	1	1	1	1	15	1	1	1	1	1	1	1	1	1	1	1	1	1	1	1
1	41	1	0	3410	10	2	OK	0	0	0	0	0	0	0		nie	1-1	15	1	1	1	1	1	1	1	1	1	1	1	1	1	1	1	15	1	1	1	1	1	1	1	1	1	1	1	1	1	1	1
1	41	1	0	3270	10	2	OK	0	0	0	0	0	0	0		nie	1-1	15	1	1	1	1	1	1	1	1	1	1	1	1	1	1	1	15	1	1	1	1	1	1	1	1	1	1	1	1	1	1	1
0	42	1	0	4220	9	2	OK	0	0	0	0	0	0	0		nie	0-0	2	0	0	0	0	0	0	0	0	0	0	0	0	0	1	1	5	0	0	0	0	1	1	0	1	1	1	0	0	0	0	0
1	42	1	0	3860	10	2	OK	0	0	0	0	0	0	0		nie	0-0	0	0	0	0	0	0	0	0	0	0	0	0	0	0	0	0	0	0	0	0	0	0	0	0	0	0	0	0	0	0	0	0
1	42	1	0	3480	10	2	OK	0	0	0	0	0	0	0		nie	0-0	6	0	0	0	1	1	1	1	0	0	0	0	0	0	1	1	8	0	0	0	0	1	1	1	1	1	1	0	1	1	0	0
1	42	1	0	2770	10	2	OK	0	0	0	0	0	0	0		nie	0-0	4	0	0	0	0	0	0	0	0	0	0	0	1	1	1	1	8	0	0	0	0	1	1	0	1	1	0	1	1	1	1	1
1	42	1	0	3260	10	2	OK	0	0	0	0	0	0	0		nie	0-0	6	0	0	0	0	0	1	1	0	0	0	0	1	1	1	1	8	0	0	1	1	1	1	1	1	1	1	0	0	0	0	0
0	42	1	0	3200	10	2	OK	0	0	0	0	0	0	0		nie	0-0	0	0	0	0	0	0	0	0	0	0	0	0	0	0	0	0	0	0	0	0	0	0	0	0	0	0	0	0	0	0	0	0
1	42	1	0	3480	10	2	OK	0	0	0	0	0	0	0		nie	1-1	15	1	1	1	1	1	1	1	1	1	1	1	1	1	1	1	15	1	1	1	1	1	1	1	1	1	1	1	1	1	1	1
1	42	1	0	3480	10	2	OK	0	0	0	0	0	0	0		nie	1-1	15	1	1	1	1	1	1	1	1	1	1	1	1	1	1	1	15	1	1	1	1	1	1	1	1	1	1	1	1	1	1	1
1	42	1	0	3760	10	2	OK	0	0	0	0	0	0	0		nie	1-1	15	1	1	1	1	1	1	1	1	1	1	1	1	1	1	1	15	1	1	1	1	1	1	1	1	1	1	1	1	1	1	1
0	42	1	0	3970	7	2	OK	0	0	0	0	0	0	0		nie	1-1	15	1	1	1	1	1	1	1	1	1	1	1	1	1	1	1	15	1	1	1	1	1	1	1	1	1	1	1	1	1	1	1
1	42	1	0	3480	10	2	OK	0	0	0	0	0	0	0		nie	1-1	15	1	1	1	1	1	1	1	1	1	1	1	1	1	1	1	15	1	1	1	1	1	1	1	1	1	1	1	1	1	1	1
[truncated: 4 more columns]
